# Supplementary material
Source: publisher figshare collection journal article supplement (https://gsapubs.figshare.com/ndownloader/files/23301230)
Supplement: Supplementary file 1 [file 23301230]

## Sheet: Detrital zircon U-Pb
Detrital U-Pb Analysis							Isotope ratios						Apparent ages (Ma)
Analysis	U	206Pb	U/Th	206Pb*	±	207Pb*	±	206Pb*	±	error	206Pb*	±	207Pb*	±	206Pb*	±	Best age	±	Conc
	(ppm)	204Pb		207Pb*	(%)	235U*	(%)	238U	(%)	corr.	238U*	(Ma)	235U	(Ma)	207Pb*	(Ma)	(Ma)	(Ma)	(%)
Sample:	1LQ-51		N29.12652	E88.65069
1LQ51-86	102.847	4880.79	1.28554	28.1881	58.3116	0.0636185	58.5724	0.0130061	5.52095	0.0942585	83.3024	4.56949	62.6255	35.5876	-671.196	1741.41	83.3024	4.56949	NA
1LQ51-44	236.648	16091.4	1.0459	21.4985	16.8724	0.085269	17.1925	0.0132953	3.30219	0.192072	85.1423	2.79308	83.0867	13.7167	24.4115	407.257	85.1423	2.79308	NA
1LQ51-99	305.273	23665.8	1.26313	19.9	17.3145	0.0978645	17.481	0.0141247	2.40664	0.137672	90.4163	2.16081	94.8032	15.8237	206.636	404.227	90.4163	2.16081	NA
1LQ51-65	134.205	6866.11	1.58682	26.0554	57.1991	0.0754637	58.0627	0.0142605	9.97682	0.171828	91.2797	9.04264	73.871	41.3914	-458.885	1630.98	91.2797	9.04264	NA
1LQ51-18	414.19	1312.75	0.962076	15.0497	19.6063	0.131705	19.9773	0.0143757	3.83209	0.191822	92.0117	3.50093	125.628	23.6109	820.492	413.199	92.0117	3.50093	NA
1LQ51-9	225.58	19609.9	0.877139	22.4927	18.7875	0.0881594	19.1048	0.0143817	3.46772	0.18151	92.05	3.16935	85.7873	15.7175	-85.1933	463.721	92.05	3.16935	NA
1LQ51-21	799.762	109287	0.895256	20.6455	3.67015	0.0970452	3.94081	0.0145311	1.43528	0.364209	92.9993	1.32522	94.0452	3.5397	120.669	86.4958	92.9993	1.32522	NA
1LQ51-2	230.526	25276.8	1.60045	20.5658	17.164	0.099791	17.4812	0.0148846	3.31497	0.18963	95.245	3.13413	96.5834	16.1072	129.757	406.347	95.245	3.13413	NA
1LQ51-54	248.867	11605.5	1.7436	21.743	12.6269	0.0946845	12.7325	0.0149313	1.63657	0.128535	95.542	1.55208	91.8579	11.1828	-2.79379	305.529	95.542	1.55208	NA
1LQ51-23	369.933	44385.5	1.32005	21.508	9.5199	0.0960189	9.9638	0.0149781	2.9409	0.295159	95.8388	2.79768	93.0948	8.86349	23.3435	228.882	95.8388	2.79768	NA
1LQ51-61	392.651	68827.1	1.63493	21.1819	7.19633	0.0984702	7.43842	0.0151275	1.88225	0.253044	96.7881	1.80818	95.3632	6.7707	59.8719	171.699	96.7881	1.80818	NA
1LQ51-11	169.699	10591.7	1.64491	19.881	12.7719	0.105091	13.136	0.0151532	3.0715	0.233823	96.9511	2.95557	101.465	12.6848	208.845	297.142	96.9511	2.95557	NA
1LQ51-26	169.038	10647	0.934662	23.5492	14.7728	0.0891754	15.5705	0.0152307	4.91996	0.315979	97.4431	4.75811	86.735	12.9451	-198.893	371.712	97.4431	4.75811	NA
1LQ51-46	254.929	18094.5	1.62472	21.837	14.5921	0.0975165	14.909	0.0154444	3.05797	0.205109	98.7999	2.99824	94.4813	13.4515	-13.2055	354.19	98.7999	2.99824	NA
1LQ51-62	83.5896	8611.42	2.10072	20.8875	23.7379	0.102267	24.7288	0.0154924	6.92988	0.280236	99.1048	6.81532	98.8665	23.3	93.1326	569.145	99.1048	6.81532	NA
1LQ51-82	145.089	13730	2.36172	23.9341	21.0415	0.089455	21.3324	0.0155282	3.51053	0.164564	99.3319	3.46035	86.9956	17.7872	-239.673	536.259	99.3319	3.46035	NA
1LQ51-6	86.8179	11250.6	1.7748	30.1696	50.0316	0.0715897	50.7541	0.0156646	8.53382	0.16814	100.198	8.48458	70.2069	34.4421	-862.56	1518.94	100.198	8.48458	NA
1LQ51-16	262.55	28055.2	2.42365	19.1674	11.1055	0.11353	11.1671	0.0157824	1.17164	0.104919	100.945	1.17351	109.19	11.5611	292.949	254.301	100.945	1.17351	NA
1LQ51-100	472.448	30488.3	1.77817	20.8112	4.77524	0.104986	5.04544	0.0158463	1.62898	0.322862	101.351	1.63807	101.368	4.8675	101.805	112.972	101.351	1.63807	NA
1LQ51-68	546.013	50537.2	1.702	20.519	5.71349	0.107692	5.90706	0.0160265	1.49981	0.2539	102.495	1.52506	103.852	5.83138	135.094	134.35	102.495	1.52506	NA
1LQ51-8	66.7057	5301.4	2.2317	21.0995	42.869	0.105359	43.4455	0.0161229	7.05381	0.16236	103.106	7.21506	101.711	42.0719	69.1692	1064.2	103.106	7.21506	NA
1LQ51-53	124.635	6809.44	2.09049	25.3876	19.2362	0.0876712	19.6473	0.0161427	3.99776	0.203477	103.232	4.09409	85.3317	16.0815	-390.821	504.527	103.232	4.09409	NA
1LQ51-80	226.101	15954.6	2.26905	23.0908	15.2252	0.0967304	15.5581	0.0161995	3.20101	0.205746	103.592	3.28947	93.7538	13.934	-149.889	379.561	103.592	3.28947	NA
1LQ51-76	51.5892	5804.44	2.32557	22.9815	31.9606	0.0982047	33.4616	0.0163685	9.90943	0.296144	104.664	10.2879	95.1178	30.3917	-138.13	808.78	104.664	10.2879	NA
1LQ51-33	135.514	13291.5	2.629	20.6762	20.712	0.110026	21.0135	0.0164993	3.54686	0.168789	105.493	3.71125	105.989	21.1521	117.13	492.939	105.493	3.71125	NA
1LQ51-2	101.112	3414.49	2.94725	15.7955	25.3965	0.144756	26.6126	0.0165832	7.95282	0.298837	106.026	8.36307	137.271	34.1826	718.608	547.435	106.026	8.36307	NA
1LQ51-47	231.23	16744.6	1.25848	20.7552	10.4531	0.110824	10.9635	0.0166824	3.30619	0.301563	106.655	3.4972	106.719	11.1067	108.125	247.447	106.655	3.4972	NA
1LQ51-43	90.2894	4379.82	1.3858	28.7311	44.6883	0.0829032	44.8427	0.0172752	3.71778	0.0829072	110.412	4.06992	80.8708	34.8718	-724.147	1301.5	110.412	4.06992	NA
1LQ51-105	199.924	24233.2	0.864383	19.0485	7.98983	0.143014	8.12612	0.0197578	1.48205	0.182381	126.125	1.85107	135.725	10.3242	307.136	182.222	126.125	1.85107	NA
1LQ51-13	164.83	20722.4	1.1486	21.1907	15.5772	0.129071	16.0851	0.0198369	4.00992	0.249294	126.625	5.02802	123.263	18.6728	58.8977	373.228	126.625	5.02802	NA
1LQ51-1	239.563	7233.06	1.76575	20.0582	6.84041	0.137571	7.09718	0.0200132	1.89177	0.266552	127.739	2.39274	130.878	8.71513	188.213	159.34	127.739	2.39274	NA
1LQ51-66	167.64	18901.3	0.963758	21.2182	14.9439	0.131614	15.6859	0.020254	4.76713	0.303913	129.261	6.10068	125.547	18.5264	55.7771	358.112	129.261	6.10068	NA
1LQ51-50	146.965	15243.1	0.676635	20.7611	13.336	0.137339	14.2355	0.0206796	4.98015	0.34984	131.95	6.50451	130.671	17.4562	107.506	316.201	131.95	6.50451	NA
1LQ51-69	503.45	34337.6	0.806624	15.8065	16.4215	0.209245	16.8642	0.0239877	3.83881	0.227631	152.809	5.79708	192.919	29.6387	717.131	350.909	152.809	5.79708	NA
1LQ51-10	59.3558	8098.59	1.57221	19.3009	20.6119	0.200233	21.2438	0.0280292	5.1431	0.242098	178.202	9.03958	185.323	36.001	277.107	476.448	178.202	9.03958	NA
1LQ51-103	785.548	197416	44.375	20.0012	3.81655	0.215537	3.84571	0.0312664	0.472674	0.122909	198.469	0.923818	198.189	6.92417	194.871	88.7321	198.469	0.923818	NA
1LQ51-14	469.73	107926	0.54925	19.2277	2.80641	0.269953	2.89848	0.0376455	0.72474	0.250042	238.222	1.69498	242.656	6.25612	285.778	64.1582	238.222	1.69498	NA
1LQ51-28	89.107	18266.9	1.49096	18.9575	11.1933	0.276512	11.4396	0.0380184	2.36148	0.206429	240.538	5.57559	247.887	25.1663	318.014	255.177	240.538	5.57559	NA
1LQ51-84	102.371	18777.6	1.46216	20.7363	10.5785	0.259637	11.0132	0.0390478	3.06369	0.278183	246.928	7.42205	234.374	23.0537	110.313	250.329	246.928	7.42205	NA
1LQ51-42	122.244	35928.8	1.68221	19.4736	9.30108	0.311357	9.43881	0.0439748	1.60654	0.170205	277.424	4.36237	275.233	22.7592	256.653	214.191	277.424	4.36237	NA
1LQ51-19	67.4192	16730.1	1.41758	18.8171	9.71924	0.372844	9.97143	0.0508836	2.22839	0.223478	319.944	6.95558	321.759	27.5042	334.942	220.739	319.944	6.95558	NA
1LQ51-63	227.524	52352.8	1.99825	18.1569	3.95599	0.39088	4.29881	0.0514734	1.68224	0.391326	323.561	5.30872	335.012	12.2674	415.269	88.4381	323.561	5.30872	NA
1LQ51-5	748.991	88005.8	3.28545	18.5677	1.20792	0.436245	2.15524	0.0587471	1.78493	0.828182	368.001	6.38459	367.601	6.64711	365.057	27.2326	368.001	6.38459	NA
1LQ51-70	201.94	54533.4	1.43793	18.4381	3.00121	0.482766	3.64287	0.0645583	2.06476	0.566794	403.288	8.07181	399.968	12.0436	380.814	67.4857	403.288	8.07181	105.901
1LQ51-12	418.247	149465	1.25944	17.8214	2.00049	0.524874	2.47576	0.0678413	1.45858	0.589142	423.137	5.97359	428.402	8.65307	456.806	44.3945	423.137	5.97359	92.6295
1LQ51-74	117.723	41728.3	1.27697	17.5626	4.35014	0.593267	4.60834	0.0755682	1.52087	0.330026	469.615	6.88831	472.952	17.4252	489.169	96.0345	469.615	6.88831	96.0027
1LQ51-75	148.102	51488.8	0.750297	17.5208	3.7056	0.651903	3.94287	0.0828391	1.34713	0.341663	513.047	6.64355	509.649	15.8007	494.439	81.7256	513.047	6.64355	103.763
1LQ51-24	1481.74	501382	1.70533	17.3231	0.530883	0.663061	0.841904	0.0833062	0.653426	0.776129	515.827	3.23922	516.485	3.40831	519.376	11.6522	515.827	3.23922	99.3167
1LQ51-25	113.539	31013.8	1.14407	17.7007	3.21676	0.660655	3.45875	0.0848134	1.27099	0.367471	524.79	6.40577	515.014	13.9724	471.862	71.1966	524.79	6.40577	111.217
1LQ51-2	54.0623	34521.7	0.918357	16.9147	5.1563	0.702638	6.13547	0.0861975	3.32514	0.541954	533.009	17.0104	540.365	25.7146	571.504	112.262	533.009	17.0104	93.2642
1LQ51-7	91.6068	40999.2	1.02708	17.5289	2.65404	0.692505	3.15955	0.0880391	1.71429	0.542574	543.93	8.94198	534.304	13.1272	493.406	58.5385	543.93	8.94198	110.24
1LQ51-55	611.296	386488	4.07953	16.9498	0.706561	0.731991	0.825246	0.0899847	0.426383	0.516674	555.447	2.26917	557.721	3.5414	567.036	15.3834	555.447	2.26917	97.9562
1LQ51-73	99.9623	38663.2	1.47572	16.3712	3.00174	0.774155	3.2867	0.0919194	1.33863	0.407288	566.879	7.26433	582.144	14.5632	642.175	64.5495	566.879	7.26433	88.2748
1LQ51-98	169.196	103499	4.55785	17.0519	2.06927	0.747476	2.38013	0.0924416	1.17606	0.494116	569.961	6.4153	566.759	10.3379	553.931	45.1487	569.961	6.4153	102.894
1LQ51-22	294.329	194452	4.78056	16.9939	1.36838	0.751459	1.85864	0.0926182	1.2578	0.676733	571.003	6.87319	569.071	8.09727	561.345	29.8206	571.003	6.87319	101.721
1LQ51-78	110.153	45350.9	0.551819	16.8449	4.75977	0.769852	5.0638	0.0940536	1.7282	0.341285	579.466	9.57743	579.678	22.369	580.488	103.465	579.466	9.57743	99.824
1LQ51-38	77.7173	30897.2	0.822238	16.356	6.07799	0.812954	6.30905	0.0964366	1.69179	0.268153	593.492	9.59232	604.11	28.7335	644.169	130.738	593.492	9.59232	92.1331
1LQ51-72	64.2203	28747.5	0.997632	17.4398	6.67506	0.765794	6.84888	0.0968619	1.5332	0.223861	595.992	8.72806	577.347	30.1682	504.631	147.021	595.992	8.72806	118.105
1LQ51-104	82.8884	23930.2	0.962454	16.8183	4.7928	0.796434	4.96413	0.0971473	1.29291	0.260451	597.669	7.37996	594.815	22.3502	583.924	104.102	597.669	7.37996	102.354
1LQ51-37	212.435	130260	0.790278	16.7024	1.78269	0.80608	1.88437	0.0976461	0.610651	0.324061	600.6	3.5019	600.253	8.53981	598.946	38.6065	600.6	3.5019	100.276
1LQ51-39	325.144	202688	7.72035	16.6052	1.09333	0.840532	2.5274	0.101227	2.27868	0.90159	621.595	13.5027	619.439	11.7202	611.549	23.6284	621.595	13.5027	101.643
1LQ51-52	202.335	154458	1.64553	15.7916	1.49402	0.978801	1.77127	0.112103	0.95147	0.537169	684.95	6.18281	692.99	8.89645	719.143	31.7041	684.95	6.18281	95.2454
1LQ51-92	142.737	121261	0.990831	13.6408	0.922051	1.64407	5.38096	0.162651	5.30137	0.985209	971.493	47.8104	987.275	33.9859	1022.51	18.6623	1022.51	18.6623	95.0109
1LQ51-48	373.387	405266	2.66859	13.5821	0.93814	1.57852	2.88541	0.155495	2.72864	0.945669	931.693	23.6709	961.787	17.9375	1031.22	18.9809	1031.22	18.9809	90.3488
1LQ51-40	350.252	229384	1.61845	13.4669	0.945704	1.64208	3.04482	0.160384	2.89423	0.950542	958.912	25.7878	986.514	19.2173	1048.46	19.0852	1048.46	19.0852	91.4595
1LQ51-88	246.691	224276	1.1775	13.382	0.901939	1.76657	3.50097	0.171455	3.3828	0.966245	1020.12	31.917	1033.26	22.7028	1061.19	18.1485	1061.19	18.1485	96.1296
1LQ51-32	62.7478	75607	0.620636	13.2171	3.96444	1.82685	4.97744	0.175121	3.00968	0.604664	1040.27	28.9133	1055.15	32.6728	1086.06	79.503	1086.06	79.503	95.7836
1LQ51-36	57.4462	61528.5	1.0209	13.1684	2.70329	1.93806	2.87102	0.185097	0.966927	0.336789	1094.76	9.73551	1094.33	19.232	1093.49	54.1499	1093.49	54.1499	100.117
1LQ51-51	181.031	301959	1.78913	13.1511	1.45376	1.91953	2.20896	0.183087	1.66316	0.752914	1083.81	16.5918	1087.91	14.7479	1096.12	29.0993	1096.12	29.0993	98.8771
1LQ51-35	30.3507	29411.3	0.763339	12.9672	5.04751	1.96746	5.14941	0.185034	1.01934	0.197953	1094.41	10.2602	1104.44	34.6799	1124.22	100.675	1124.22	100.675	97.3488
1LQ51-90	26.0886	28575.9	0.611901	12.8511	5.90948	2.08003	6.203	0.193869	1.88554	0.303972	1142.3	19.7382	1142.24	42.5598	1142.13	117.585	1142.13	117.585	100.015
1LQ51-96	79.3931	83044.9	0.914293	12.8123	1.21003	2.14429	1.63847	0.199256	1.10472	0.674237	1171.32	11.8323	1163.21	11.3461	1148.14	24.0547	1148.14	24.0547	102.019
1LQ51-67	96.7046	92992.5	0.885006	12.7539	1.0322	2.15461	1.42565	0.199302	0.98338	0.689776	1171.57	10.5347	1166.54	9.88735	1157.19	20.4758	1157.19	20.4758	101.243
1LQ51-60	160.801	124345	1.54304	12.6737	0.944028	2.14407	1.96075	0.197079	1.71854	0.876467	1159.61	18.2387	1163.14	13.5777	1169.71	18.704	1169.71	18.704	99.1367
1LQ51-89	142.554	108470	0.978694	12.6637	2.33739	2.18416	2.38087	0.200606	0.452931	0.190237	1178.58	4.87859	1176.01	16.5842	1171.3	46.2746	1171.3	46.2746	100.621
1LQ51-34	316.079	230548	1.46253	12.5855	0.341224	2.1516	1.41006	0.196395	1.36815	0.970278	1155.92	14.478	1165.57	9.77487	1183.55	6.73345	1183.55	6.73345	97.6659
1LQ51-71	268.916	169328	2.47173	12.5792	0.645584	2.16111	1.79617	0.197165	1.67614	0.933175	1160.07	17.7953	1168.63	12.4692	1184.53	12.7554	1184.53	12.7554	97.9351
1LQ51-45	178.826	83128.3	1.03452	12.5388	0.825084	2.16614	2.05312	0.196988	1.88003	0.915697	1159.12	19.9451	1170.24	14.2636	1190.88	16.2865	1190.88	16.2865	97.333
1LQ51-85	51.1487	58369.5	0.692929	12.4476	3.35907	2.19933	3.57706	0.198552	1.22965	0.343759	1167.53	13.1315	1180.83	24.9733	1205.25	66.1836	1205.25	66.1836	96.8703
1LQ51-56	774.742	176961	6.01785	12.3588	1.15241	2.26341	1.30832	0.202879	0.619395	0.473427	1190.77	6.73442	1200.97	9.21399	1219.38	22.6708	1219.38	22.6708	97.6533
1LQ51-102	58.389	41111.3	0.73629	12.3357	2.01481	2.26806	3.25493	0.202915	2.55638	0.785389	1190.96	27.7989	1202.41	22.9408	1223.02	39.5831	1223.02	39.5831	97.3786
1LQ51-77	173.043	229547	1.14692	11.8282	0.768048	2.49728	3.37635	0.214233	3.28783	0.973783	1251.33	37.3953	1271.25	24.4849	1305.07	14.9156	1305.07	14.9156	95.8821
1LQ51-41	218.75	208081	1.93286	11.3807	0.726191	2.86686	1.0007	0.236633	0.688505	0.688026	1369.17	8.49297	1373.25	7.53335	1379.58	13.9574	1379.58	13.9574	99.2452
1LQ51-15	172.802	357603	0.884016	10.7722	0.521446	3.27206	1.96236	0.255637	1.89182	0.964049	1467.48	24.829	1474.43	15.2625	1484.44	9.87995	1484.44	9.87995	98.8573
1LQ51-87	185.784	286265	1.22937	10.7101	0.717291	3.35792	1.19056	0.260833	0.95022	0.798131	1494.1	12.6721	1494.64	9.315	1495.38	13.5709	1495.38	13.5709	99.9145
1LQ51-31	86.2527	125531	1.00729	10.3307	1.47139	3.73217	1.70363	0.279635	0.858698	0.504041	1589.53	12.0966	1578.3	13.6437	1563.3	27.5887	1563.3	27.5887	101.678
1LQ51-29	111.769	193495	2.26423	9.08944	0.894356	4.86326	1.24711	0.3206	0.869145	0.696927	1792.66	13.602	1795.91	10.5036	1799.68	16.2738	1799.68	16.2738	99.6098
1LQ51-57	834.738	218132	1.75773	8.7715	0.20871	4.94538	1.00442	0.31461	0.982498	0.978173	1763.35	15.1575	1810.04	8.48352	1864.2	3.76796	1864.2	3.76796	94.5901
1LQ51-83	394.625	1.22099e+06	13.5031	8.65338	0.197307	5.38935	0.929838	0.338237	0.908663	0.977227	1878.18	14.805	1883.16	7.9639	1888.65	3.54967	1888.65	3.54967	99.446
1LQ51-79	65.2538	116967	0.746581	6.1298	0.547099	10.1393	2.24808	0.450766	2.18049	0.969935	2398.66	43.675	2447.56	20.7803	2488.43	9.22125	2488.43	9.22125	96.3926
1LQ51-93	93.1129	271442	1.90987	5.64004	0.388407	11.7729	2.46919	0.481577	2.43845	0.987551	2534.13	51.0956	2586.51	23.1129	2627.8	6.4578	2627.8	6.4578	96.4354
1LQ51-58	108.844	380962	1.91509	3.04136	0.320526	33.0419	1.37021	0.72884	1.33219	0.972255	3529.09	36.2048	3581.86	13.5049	3611.49	4.9166	3611.49	4.9166	97.7185
Sample:	1LQ-660		N29.12032	N88.55923
1LQ660-33	198.89	2145.93	1.1326	19.7403	25.225	0.0931367	25.5457	0.0133344	4.03515	0.157958	85.391	3.42293	90.4211	22.1036	225.275	591.356	85.391	3.42293	NA
1LQ660-44	91.4061	2123.51	0.716369	26.114	19.7326	0.071306	20.9184	0.0135051	6.943	0.331908	86.477	5.96401	69.938	14.1384	-464.823	525.629	86.477	5.96401	NA
1LQ660-72	497.34	15335.7	1.71428	20.5672	7.94467	0.0911546	8.63742	0.0135973	3.38928	0.392395	87.0634	2.93098	88.5784	7.32679	129.58	187.151	87.0634	2.93098	NA
1LQ660-14	145.457	11085.9	1.42697	25.9321	32.3109	0.0724771	32.936	0.0136313	6.38649	0.193906	87.2795	5.53653	71.0474	22.604	-446.38	869.47	87.2795	5.53653	NA
1LQ660-79	88.5522	4787.28	1.0133	17.2053	30.3665	0.113192	31.4039	0.0141246	8.00514	0.254909	90.4161	7.18741	108.881	32.4345	534.328	679.255	90.4161	7.18741	NA
1LQ660-86	289.89	12327.9	1.15551	20.4627	11.2551	0.0978092	11.7029	0.0145158	3.2063	0.273974	92.9021	2.95736	94.7521	10.5875	141.567	264.888	92.9021	2.95736	NA
1LQ660-78	711.408	18058.1	0.900469	21.0542	3.45531	0.0953821	3.9493	0.0145648	1.91254	0.484273	93.2135	1.76992	92.5047	3.49183	74.2602	82.1265	93.2135	1.76992	NA
1LQ660-95	210.579	8101.25	1.57819	19.3774	11.242	0.103776	11.9908	0.0145846	4.17101	0.347851	93.3392	3.86514	100.256	11.4476	267.988	258.598	93.3392	3.86514	NA
1LQ660-37	157.683	3045.54	0.759992	20.9706	24.0819	0.0974264	24.3503	0.0148179	3.60548	0.148067	94.8214	3.39375	94.3979	21.9534	83.6876	578.633	94.8214	3.39375	NA
1LQ660-84	402.689	14116.4	2.35067	21.4497	8.30565	0.0970662	8.70036	0.0151004	2.59085	0.297786	96.6157	2.4845	94.0646	7.81648	29.8381	199.363	96.6157	2.4845	NA
1LQ660-22	58.5452	1466.97	1.39273	19.804	50.1479	0.105246	50.6037	0.0151166	6.77648	0.133913	96.7189	6.50522	101.607	48.9659	217.816	1234.45	96.7189	6.50522	NA
1LQ660-15	175.941	6467.22	1.23735	19.5108	12.0397	0.108452	12.4879	0.0153466	3.31545	0.265493	98.179	3.23041	104.548	12.4068	252.277	277.823	98.179	3.23041	NA
1LQ660-18	844.912	53568.1	0.861961	21.0323	3.48548	0.101374	3.75601	0.0154636	1.39967	0.372647	98.922	1.37401	98.0438	3.51035	76.7159	82.8129	98.922	1.37401	NA
1LQ660-42	61.84	1724.5	1.12813	22.4608	40.9589	0.0989516	41.301	0.0161193	5.30474	0.128441	103.083	5.4248	95.8081	37.7776	-81.7082	1041.43	103.083	5.4248	NA
1LQ660-12	65.932	2526.72	1.77886	24.1864	32.2956	0.0945549	33.2242	0.0165865	7.80016	0.234773	106.046	8.2041	91.7376	29.1508	-266.224	838.306	106.046	8.2041	NA
1LQ660-40	55.0656	2034.32	1.77701	22.6314	34.9813	0.105124	35.8725	0.0172549	7.94654	0.221522	110.283	8.68918	101.495	34.6617	-100.277	882.946	110.283	8.68918	NA
1LQ660-23	63.1879	3570.58	1.18165	35.6827	133.257	0.0730543	133.445	0.0189061	7.07837	0.0530433	120.739	8.4668	71.5937	92.503	NA	NA	120.739	8.4668	NA
1LQ660-92	305.539	11584.9	0.608619	21.4608	11.0209	0.124417	11.1686	0.0193653	1.8099	0.162053	123.644	2.2165	119.069	12.5488	28.5994	264.878	123.644	2.2165	NA
1LQ660-9	74.1916	2402.47	1.07717	22.9216	56.4203	0.12277	56.6549	0.0204096	5.15073	0.0909142	130.244	6.64121	117.58	62.9831	-131.675	1507.43	130.244	6.64121	NA
1LQ660-5	220.064	7027.6	0.775395	20.1981	10.9161	0.141307	11.8151	0.0207002	4.52055	0.382607	132.08	5.90997	134.208	14.8546	172.009	255.432	132.08	5.90997	NA
1LQ660-1	118.749	5168.49	1.72015	24.5333	30.2708	0.118473	30.544	0.0210802	4.07575	0.133439	134.479	5.42425	113.687	32.8625	-302.514	789.158	134.479	5.42425	NA
1LQ660-105	87.2982	3746.46	0.875824	24.7886	43.9875	0.119495	44.4191	0.0214833	6.17716	0.139066	137.024	8.37487	114.614	48.1785	-329.056	1180.38	137.024	8.37487	NA
1LQ660-87	556.68	44518.5	1.9288	20.7996	4.03995	0.157904	4.30351	0.0238203	1.48289	0.344577	151.755	2.22408	148.867	5.95907	103.097	95.539	151.755	2.22408	NA
1LQ660-65	146.885	1003.46	0.702546	17.8049	12.6807	0.185625	13.0787	0.0239703	3.20208	0.244832	152.7	4.83211	172.889	20.7943	458.859	282.239	152.7	4.83211	NA
1LQ660-50	56.3993	2752.2	1.45937	23.5933	60.9294	0.142214	61.3492	0.0243349	7.16471	0.116786	154.995	10.9725	135.014	77.7107	-203.585	1676.3	154.995	10.9725	NA
1LQ660-55	141.694	7525.46	1.88335	20.6897	10.9194	0.196669	11.1312	0.0295114	2.16078	0.19412	187.49	3.99289	182.304	18.5772	115.63	258.183	187.49	3.99289	NA
1LQ660-35	160.421	11353.5	0.92502	19.8896	7.5783	0.21086	7.87172	0.0304173	2.12917	0.270483	193.159	4.05168	194.274	13.9196	207.83	175.953	193.159	4.05168	NA
1LQ660-25	731.663	66273	1.41413	20.1127	2.59328	0.214357	3.60397	0.0312686	2.5027	0.694429	198.483	4.89175	197.203	6.45966	181.889	60.4258	198.483	4.89175	NA
1LQ660-67	277.173	20424.5	0.421397	19.9355	5.6823	0.21696	5.86963	0.0313693	1.47105	0.250621	199.112	2.88428	199.376	10.6258	202.5	131.974	199.112	2.88428	NA
1LQ660-57	770.373	68710.4	4.1914	19.4917	2.20805	0.235192	2.83116	0.0332485	1.77199	0.62589	210.847	3.67576	214.476	5.47376	254.479	50.7914	210.847	3.67576	NA
1LQ660-32	119.174	11733.3	1.29747	19.1942	14.1213	0.241238	14.3362	0.0335826	2.47249	0.172465	212.932	5.17872	219.434	28.2986	289.744	324.037	212.932	5.17872	NA
1LQ660-10	82.5191	5734.95	0.859673	17.5191	22.1885	0.39711	23.6866	0.0504571	8.2902	0.349995	317.327	25.6702	339.55	68.4654	494.662	494.562	317.327	25.6702	NA
1LQ660-63	136.208	38989.2	1.7542	20.5361	4.51091	0.342919	5.02393	0.0510749	2.2117	0.440232	321.117	6.92815	299.381	13.0268	133.138	106.092	321.117	6.92815	NA
1LQ660-59	67.8575	9112.98	0.45512	17.6448	5.97454	0.63538	6.24312	0.0813107	1.81145	0.290152	503.941	8.78097	499.441	24.6338	478.852	132.127	503.941	8.78097	105.239
1LQ660-104	84.4725	19181.8	1.45253	17.0863	6.03015	0.658913	6.20237	0.0816535	1.45142	0.23401	505.985	7.06314	513.949	25.0196	549.525	131.802	505.985	7.06314	92.0768
1LQ660-13	144.508	32765.8	1.29408	18.0379	4.48547	0.628368	4.57819	0.0822052	0.916743	0.200241	509.272	4.48906	495.079	17.9403	429.939	100.025	509.272	4.48906	118.452
1LQ660-38	588.028	125120	0.713099	17.2399	1.02777	0.664876	1.22674	0.0831333	0.669773	0.545976	514.798	3.3139	517.592	4.97446	529.967	22.5174	514.798	3.3139	97.1378
1LQ660-17	1419.33	33520.2	3.11235	17.3357	0.39052	0.670582	4.36706	0.0843124	4.34956	0.995994	521.812	21.8023	521.066	17.8011	517.781	8.5835	521.812	21.8023	100.778
1LQ660-56	154.686	49199.6	0.928616	17.4349	2.94507	0.670737	3.11818	0.0848147	1.02451	0.328559	524.798	5.16355	521.16	12.7115	505.264	64.8075	524.798	5.16355	103.866
1LQ660-47	327.627	108222	1.91465	17.3089	1.65841	0.682579	1.85976	0.0856881	0.841652	0.452559	529.985	4.28219	528.332	7.66077	521.174	36.3892	529.985	4.28219	101.691
1LQ660-62	677.532	106399	6.76425	17.0785	0.76424	0.703847	1.18397	0.087182	0.904285	0.763771	538.849	4.67464	541.086	4.96619	550.508	16.6955	538.849	4.67464	97.8822
1LQ660-73	228.642	36705.8	1.71282	17.0085	2.45935	0.722132	3.00566	0.0890803	1.72788	0.574876	550.096	9.11075	551.925	12.798	559.476	53.6025	550.096	9.11075	98.3233
1LQ660-2	617.691	161322	5.90864	17.0687	0.839631	0.727425	1.13574	0.0900509	0.764797	0.673394	555.838	4.07292	555.041	4.85623	551.779	18.3489	555.838	4.07292	100.736
1LQ660-54	703.143	156049	4.07115	16.9741	0.617456	0.732952	1.00864	0.0902323	0.797556	0.790727	556.911	4.25523	558.284	4.33168	563.867	13.4568	556.911	4.25523	98.7664
1LQ660-34	131.917	38417.3	0.943989	17.5154	3.25313	0.727644	3.54738	0.0924351	1.4146	0.398772	569.923	7.716	555.169	15.1717	495.136	71.7346	569.923	7.716	115.104
1LQ660-16	119.109	23888.6	0.665732	16.8872	3.92971	0.762577	4.01998	0.0933985	0.847143	0.210733	575.605	4.66484	575.496	17.6617	575.055	85.4572	575.605	4.66484	100.096
1LQ660-100	94.1674	22455.6	1.16569	16.6878	5.07698	0.777974	5.34953	0.0941594	1.68575	0.315121	580.09	9.35179	584.327	23.7719	600.806	109.975	580.09	9.35179	96.552
1LQ660-88	64.3462	13587.3	4.49867	16.6108	8.62133	0.806397	9.12071	0.097149	2.9766	0.326356	597.679	16.9907	600.431	41.3651	610.813	186.635	597.679	16.9907	97.8498
1LQ660-24	279.755	91586.1	1.91181	16.5014	1.14609	0.855267	1.74212	0.102358	1.31205	0.753131	628.213	7.85357	627.536	8.15481	625.076	24.711	628.213	7.85357	100.502
1LQ660-36	134.743	78797.9	0.956802	15.7447	2.25264	1.02374	3.12856	0.116902	2.17106	0.693948	712.71	14.6487	715.792	16.0711	725.448	47.7767	712.71	14.6487	98.2441
1LQ660-91	138.125	54436.5	0.60013	15.4242	1.34383	1.15851	2.11424	0.129599	1.63221	0.77201	785.576	12.0718	781.256	11.5225	768.914	28.2991	785.576	12.0718	102.167
1LQ660-58	241.131	91361.6	1.60472	13.6159	0.447342	1.66023	1.63338	0.163951	1.57092	0.961765	978.695	14.2644	993.462	10.3509	1026.19	9.04822	1026.19	9.04822	95.3715
1LQ660-21	50.3292	13948.4	1.37797	13.5596	6.22338	1.71607	6.66368	0.168765	2.38205	0.357467	1005.3	22.173	1014.56	42.7755	1034.57	125.841	1034.57	125.841	97.1707
1LQ660-41	143.222	73605.6	0.829203	13.4847	1.46616	1.75903	3.36766	0.172034	3.03175	0.900254	1023.31	28.6873	1030.49	21.8043	1045.79	29.5906	1045.79	29.5906	97.8507
1LQ660-90	55.2812	30085	3.46033	13.4313	3.52125	1.75066	4.35526	0.170536	2.56303	0.58849	1015.07	24.0716	1027.41	28.1527	1053.8	70.9522	1053.8	70.9522	96.3247
1LQ660-96	327.884	120084	3.77171	13.3548	0.575776	1.80231	1.51265	0.174567	1.39878	0.924723	1037.23	13.4015	1046.29	9.87859	1065.29	11.5788	1065.29	11.5788	97.3654
1LQ660-29	376.28	200635	6.97479	13.2993	0.867142	1.71858	3.5258	0.165767	3.4175	0.969285	988.747	31.3269	1015.5	22.6354	1073.65	17.3966	1073.65	17.3966	92.0921
1LQ660-26	347.453	161988	2.59428	13.2969	0.557106	1.77091	1.41767	0.170783	1.30362	0.91955	1016.42	12.2585	1034.85	9.20007	1074.02	11.1741	1074.02	11.1741	94.637
1LQ660-80	123.309	58681.9	1.49721	13.147	1.34427	1.93485	1.85317	0.18449	1.27561	0.68834	1091.46	12.8079	1093.22	12.4059	1096.71	26.8947	1096.71	26.8947	99.5206
1LQ660-94	121.844	42313.7	0.717961	13.1437	1.42626	1.87842	1.82924	0.179065	1.14539	0.626155	1061.86	11.2136	1073.51	12.1216	1097.23	28.5346	1097.23	28.5346	96.7772
1LQ660-85	582.623	248384	6.64577	13.1401	0.441845	1.90941	1.58209	0.181969	1.51914	0.96021	1077.72	15.0767	1084.38	10.5431	1097.79	8.83357	1097.79	8.83357	98.1721
1LQ660-49	122.907	61092.3	0.962139	12.9753	2.00195	2.09214	2.12103	0.196882	0.700705	0.33036	1158.55	7.43033	1146.23	14.5727	1122.99	39.9158	1122.99	39.9158	103.167
1LQ660-97	37.4207	13560.4	0.603963	12.8404	6.27266	2.06589	7.04798	0.192392	3.21369	0.455973	1134.32	33.4267	1137.57	48.2583	1143.8	124.811	1143.8	124.811	99.1706
1LQ660-77	205.032	68760	1.21319	12.7485	1.10572	1.98753	2.40207	0.183769	2.13245	0.887753	1087.53	21.3405	1111.28	16.2276	1158.03	21.9324	1158.03	21.9324	93.9124
1LQ660-46	412.013	133515	1.52284	12.7278	0.472652	2.1605	0.788171	0.199437	0.630724	0.800238	1172.29	6.76061	1168.43	5.47083	1161.26	9.38859	1161.26	9.38859	100.95
1LQ660-101	49.6744	22775.4	3.08608	12.6937	2.76532	2.10615	3.57206	0.1939	2.2611	0.632998	1142.47	23.6728	1150.82	24.598	1166.57	54.7907	1166.57	54.7907	97.9341
1LQ660-102	110.07	68375.7	1.0076	12.6584	2.12488	2.14683	2.30509	0.197095	0.893506	0.387622	1159.69	9.48336	1164.03	15.969	1172.13	42.0596	1172.13	42.0596	98.939
1LQ660-75	87.4739	51997.9	0.955931	12.6489	1.2003	2.05771	2.3525	0.188771	2.02325	0.860043	1114.71	20.7113	1134.86	16.0762	1173.61	23.7606	1173.61	23.7606	94.9813
1LQ660-98	142.896	119012	2.30841	12.6417	1.69731	2.09446	6.61943	0.192033	6.39812	0.966567	1132.38	66.4469	1146.99	45.5227	1174.73	33.6039	1174.73	33.6039	96.3948
1LQ660-7	194.203	54686.6	1.72291	12.6411	1.00362	2.20114	1.42501	0.201804	1.01163	0.70991	1185.01	10.9505	1181.4	9.94956	1174.83	19.8652	1174.83	19.8652	100.866
1LQ660-60	53.5868	35852.1	0.641596	12.6049	2.45051	2.10017	2.69555	0.191995	1.12294	0.416589	1132.18	11.6598	1148.86	18.5436	1180.51	48.434	1180.51	48.434	95.9058
1LQ660-66	111.521	65504.9	0.585027	12.5942	0.699035	2.17033	1.35645	0.198242	1.16246	0.856986	1165.87	12.3979	1171.58	9.42905	1182.18	13.8155	1182.18	13.8155	98.6204
1LQ660-93	108.335	60673	1.84833	12.5776	0.668752	2.18758	1.69057	0.199554	1.55267	0.918432	1172.92	16.651	1177.1	11.7811	1184.79	13.1945	1184.79	13.1945	98.9983
1LQ660-81	76.1747	62995.5	0.598269	12.5628	1.73167	2.16344	2.14588	0.19712	1.26733	0.590588	1159.83	13.4525	1169.38	14.9023	1187.11	34.2226	1187.11	34.2226	97.7016
1LQ660-76	136.159	145568	1.79362	12.1484	1.41504	2.2466	2.5859	0.197945	2.16438	0.836992	1164.27	23.0548	1195.72	18.1713	1253.01	27.6846	1253.01	27.6846	92.9179
1LQ660-19	195.585	127775	1.51179	12.0845	3.78008	2.5872	5.19752	0.226755	3.56725	0.686336	1317.47	42.5066	1297.02	38.0806	1263.33	73.8566	1263.33	73.8566	104.285
1LQ660-6	63.4731	28913.1	1.44914	12.0845	2.63626	2.49291	3.91597	0.218491	2.89568	0.739454	1273.89	33.4721	1269.98	28.3858	1263.33	51.4919	1263.33	51.4919	100.836
1LQ660-69	321.064	158292	1.03937	11.7877	0.455414	2.66525	1.1152	0.227858	1.01797	0.912816	1323.26	12.1778	1318.88	8.23428	1311.74	8.83643	1311.74	8.83643	100.879
1LQ660-68	130.882	35836.8	1.351	11.7802	0.65771	2.65845	1.73534	0.227132	1.60587	0.925393	1319.45	19.161	1316.99	12.8047	1312.98	12.7577	1312.98	12.7577	100.493
1LQ660-39	70.8918	27343.3	1.35095	11.736	1.96858	2.58342	2.78828	0.219895	1.97464	0.708193	1281.32	22.9456	1295.95	20.4137	1320.25	38.1517	1320.25	38.1517	97.0509
1LQ660-53	84.129	84376.5	1.2662	10.5886	1.58757	3.36363	2.27697	0.258313	1.63224	0.716847	1481.21	21.6004	1495.97	17.8235	1516.93	29.9503	1516.93	29.9503	97.6449
1LQ660-89	29.5673	21914.9	0.392991	10.1619	3.49232	3.69823	3.97488	0.272564	1.89825	0.477562	1553.8	26.2097	1570.99	31.7801	1594.13	65.2353	1594.13	65.2353	97.4705
1LQ660-51	188.635	127841	2.40122	9.65346	0.742633	4.18714	1.28804	0.293156	1.0524	0.817055	1657.28	15.3797	1671.51	10.5576	1689.4	13.7001	1689.4	13.7001	98.0991
1LQ660-31	169.189	104390	1.84676	9.28545	0.546865	4.35767	1.62061	0.293465	1.52555	0.941346	1658.82	22.3125	1704.35	13.3848	1760.77	9.99863	1760.77	9.99863	94.21
1LQ660-20	185.167	213923	3.30564	9.13768	0.587925	4.41523	1.83978	0.292609	1.74331	0.947565	1654.55	25.4399	1715.2	15.2323	1790.04	10.7087	1790.04	10.7087	92.4308
1LQ660-61	163.984	126029	1.53575	9.04308	0.662023	4.84086	1.2	0.317495	1.00086	0.834052	1777.49	15.5482	1792.03	10.0988	1808.98	12.0305	1808.98	12.0305	98.259
1LQ660-99	191.307	187625	1.89904	6.38693	0.299223	9.73987	1.33923	0.451174	1.30538	0.97472	2400.47	26.1626	2410.48	12.3328	2418.94	5.07878	2418.94	5.07878	99.2366
1LQ660-28	118.172	80730.4	1.07476	6.00618	0.282541	10.6858	1.15744	0.465485	1.12243	0.969748	2463.73	22.9828	2496.2	10.7472	2522.7	4.746	2522.7	4.746	97.6624
1LQ660-74	69.0511	77938.8	1.85437	5.49268	0.372839	12.3337	1.76141	0.491336	1.7215	0.977341	2576.45	36.5623	2630.14	16.5452	2671.72	6.17316	2671.72	6.17316	96.4344
1LQ660-43	155.766	196064	1.59963	5.28487	0.236867	13.3227	0.76695	0.510654	0.729456	0.951113	2659.42	15.8957	2702.8	7.24389	2735.37	3.89521	2735.37	3.89521	97.2234
1LQ660-71	158.641	198993	2.31788	5.1643	0.291722	13.5247	1.76735	0.506569	1.74311	0.986283	2641.96	37.7831	2717.01	16.7114	2773.29	4.78467	2773.29	4.78467	95.2646
Sample:	1LQ-1073		N29.11846	E88.65651
1LQ1073-59	1998.47	23623.2	1.78017	20.9686	5.48987	0.0342751	5.99008	0.00521251	2.39633	0.40005	33.5147	0.80104	34.2193	2.01561	83.9146	130.333	33.5147	0.80104	NA
1LQ1073-76	131.631	3702.57	1.431	18.2051	19.9493	0.0968531	21.6195	0.0127881	8.33236	0.385409	81.9144	6.78222	93.8674	19.3862	409.346	450.252	81.9144	6.78222	NA
1LQ1073-8	622.928	23927.1	1.17731	20.7745	8.01287	0.0866588	8.38227	0.0130569	2.46098	0.293593	83.6256	2.04471	84.3861	6.78762	105.938	189.571	83.6256	2.04471	NA
1LQ1073-102	134.944	3177.52	1.77516	24.6047	39.2938	0.07378	39.6214	0.0131661	5.08425	0.128321	84.3201	4.25913	72.2802	27.6497	-309.95	1040.67	84.3201	4.25913	NA
1LQ1073-105	160.189	2713.04	0.419106	23.7539	22.271	0.0775676	22.545	0.0133633	3.50394	0.15542	85.5747	2.97867	75.8555	16.4798	-220.621	566.099	85.5747	2.97867	NA
1LQ1073-117	527.769	12485.4	0.834364	19.8835	9.9801	0.0949264	10.1748	0.0136892	1.9809	0.194687	87.6478	1.72446	92.0822	8.95712	208.568	231.877	87.6478	1.72446	NA
1LQ1073-6	195.753	3549.34	0.853159	21.6117	19.1394	0.0898143	19.4961	0.0140778	3.7123	0.190413	90.1182	3.32218	87.3303	16.3157	11.769	463.918	90.1182	3.32218	NA
1LQ1073-109	307.579	1417.95	0.968431	22.8769	23.782	0.08644	24.1234	0.014342	4.04447	0.167657	91.7979	3.68643	84.1816	19.4909	-126.854	594.466	91.7979	3.68643	NA
1LQ1073-131	192.246	5807.67	2.32636	21.1462	29.7434	0.096274	30.0312	0.0147652	4.14778	0.138116	94.4868	3.89052	93.3311	26.7851	63.9062	722.264	94.4868	3.89052	NA
1LQ1073-5	231.033	6084.64	1.04555	24.2968	21.41	0.083972	22.0979	0.0147973	5.47052	0.247559	94.6905	5.14221	81.8724	17.3836	-277.796	549.972	94.6905	5.14221	NA
1LQ1073-133	54.122	1050.15	0.697451	31.365	52.1058	0.0658536	53.1616	0.0149804	10.5425	0.19831	95.8536	10.0306	64.7571	33.3631	-975.705	1629.49	95.8536	10.0306	NA
1LQ1073-130	117.381	2051.78	0.91413	21.3478	32.5814	0.0984401	32.9351	0.0152413	4.81358	0.146154	97.5108	4.65844	95.3354	29.9785	41.2698	797.747	97.5108	4.65844	NA
1LQ1073-1	461.201	8943.82	0.710552	21.7669	9.05332	0.0965451	9.12969	0.0152414	1.17835	0.129068	97.5113	1.14038	93.5822	8.16204	-5.43925	218.823	97.5113	1.14038	NA
1LQ1073-80	136.811	3559.26	0.832389	21.7808	25.0812	0.0971053	25.3182	0.0153397	3.45605	0.136505	98.1351	3.36592	94.1008	22.7578	-6.98122	613.624	98.1351	3.36592	NA
1LQ1073-94	278.331	28353.2	1.51213	20.0223	18.0657	0.108515	18.6097	0.0157581	4.46696	0.240034	100.791	4.46727	104.606	18.4998	192.429	423.105	100.791	4.46727	NA
1LQ1073-143	91.7908	485.853	0.259959	23.1776	35.7812	0.0995701	37.1278	0.0167377	9.90849	0.266875	107.005	10.5151	96.3795	34.1506	-159.205	914.581	107.005	10.5151	NA
1LQ1073-134	239.2	7910.34	1.67463	18.1209	13.4199	0.1278	13.8495	0.0167962	3.42272	0.247136	107.376	3.64473	122.119	15.9367	419.696	300.868	107.376	3.64473	NA
1LQ1073-69	83.7101	619.728	1.25576	16.5538	19.3076	0.142084	20.038	0.0170585	5.36067	0.267526	109.039	5.79605	134.898	25.3175	618.244	420.353	109.039	5.79605	NA
1LQ1073-123	394.218	10026.3	0.988493	21.029	7.95566	0.117732	8.07754	0.0179561	1.3979	0.17306	114.725	1.58956	113.014	8.63926	77.0854	189.228	114.725	1.58956	NA
1LQ1073-104	66.6126	1789.02	1.41332	24.2932	53.4055	0.102831	54.1055	0.0181179	8.67455	0.160327	115.75	9.9512	99.3865	51.2691	-277.42	1452.91	115.75	9.9512	NA
1LQ1073-93	205.928	1583.12	0.853861	22.1404	16.0357	0.116934	16.4023	0.0187769	3.44841	0.210239	119.921	4.09715	112.289	17.4378	-46.6478	392.082	119.921	4.09715	NA
1LQ1073-115	53.2737	636.638	1.0691	41.9209	68.0939	0.0619795	68.8988	0.0188442	10.5009	0.152411	120.347	12.5204	61.0597	40.8515	-1928.09	531.098	120.347	12.5204	NA
1LQ1073-10	70.0855	4068.86	1.03544	21.0382	38.5541	0.124309	39.1961	0.0189676	7.06482	0.180243	121.128	8.47757	118.971	44.0314	76.0399	947.524	121.128	8.47757	NA
1LQ1073-82	86.1183	2444.19	0.994553	19.8469	44.7949	0.132213	44.9693	0.0190311	3.95651	0.0879825	121.53	4.76329	126.084	53.3692	212.806	1088.49	121.53	4.76329	NA
1LQ1073-111	53.7897	1476.72	0.899241	3.01368	1053.5	0.876327	1053.52	0.0191541	6.50747	0.00617689	122.308	7.8841	638.997	#NUM!	3625.51	644.904	122.308	7.8841	NA
1LQ1073-40	201.567	4679.29	1.40438	21.6782	14.5756	0.122963	15.1243	0.0193329	4.03704	0.266924	123.439	4.93586	117.755	16.8173	4.35787	352.6	123.439	4.93586	NA
1LQ1073-112	50.0046	1828.54	1.01074	30.498	83.1265	0.0876362	83.6809	0.0193845	9.61625	0.114916	123.765	11.788	85.299	68.567	-893.804	2966.55	123.765	11.788	NA
1LQ1073-135	109.5	7247.48	0.861224	20.3158	23.1976	0.131749	24.1191	0.0194124	6.6031	0.273771	123.941	8.10578	125.668	28.5168	158.435	549.235	123.941	8.10578	NA
1LQ1073-126	209.008	6307.27	0.859489	19.6749	14.3071	0.136771	14.5331	0.0195167	2.55321	0.175682	124.601	3.15077	130.164	17.7564	232.928	331.709	124.601	3.15077	NA
1LQ1073-132	217.061	6799.65	1.3368	17.8455	10.3522	0.151389	10.689	0.0195939	2.66232	0.24907	125.089	3.29817	143.138	14.2715	453.843	230.345	125.089	3.29817	NA
1LQ1073-13	226.54	9122.93	0.929618	20.7113	14.0849	0.131022	14.5047	0.0196811	3.4642	0.238833	125.64	4.31028	125.016	17.0629	113.154	333.768	125.64	4.31028	NA
1LQ1073-45	236.228	18409.7	2.71608	21.0606	11.9467	0.130186	12.0479	0.0198854	1.55793	0.129311	126.932	1.95816	124.265	14.0924	73.5594	284.841	126.932	1.95816	NA
1LQ1073-27	352.394	22521.8	0.984415	20.4927	10.9163	0.134084	11.1269	0.0199285	2.15476	0.193653	127.204	2.71408	127.761	13.3586	138.12	257.035	127.204	2.71408	NA
1LQ1073-128	157.595	4522.15	0.744937	19.222	23.0838	0.142956	23.3678	0.0199298	3.63169	0.155415	127.212	4.57466	135.674	29.6855	286.45	534.006	127.212	4.57466	NA
1LQ1073-142	207.853	545.712	0.495245	15.3566	14.2252	0.179664	14.9429	0.0200104	4.57541	0.306193	127.722	5.78628	167.772	23.1123	778.15	300.496	127.722	5.78628	NA
1LQ1073-129	194.519	10987.9	0.634673	17.7478	27.2544	0.155476	27.6722	0.0200127	4.79	0.173098	127.736	6.05836	146.735	37.8248	465.996	614.071	127.736	6.05836	NA
1LQ1073-136	214.325	3632.7	0.377522	19.8939	21.2971	0.13987	21.6763	0.0201809	4.03645	0.186215	128.799	5.14733	132.928	27.0138	207.347	498.845	128.799	5.14733	NA
1LQ1073-122	318.173	11092.3	0.941669	19.6766	12.063	0.141674	12.4522	0.020218	3.0887	0.248045	129.034	3.94584	134.534	15.6912	232.734	279.325	129.034	3.94584	NA
1LQ1073-79	208.38	14675.6	1.08446	19.9932	14.1215	0.14105	14.3052	0.0204528	2.28529	0.159752	130.517	2.9527	133.979	17.9571	195.806	329.588	130.517	2.9527	NA
1LQ1073-23	407.356	17258	2.15266	20.0026	5.93101	0.142717	10.9293	0.0207043	9.17997	0.839944	132.106	12.0039	135.461	13.8607	194.711	137.964	132.106	12.0039	NA
1LQ1073-50	145.364	6722.4	1.80168	16.6384	18.0438	0.178655	19.3697	0.0215588	7.0434	0.363629	137.5	9.58213	166.902	29.8199	607.225	393.097	137.5	9.58213	NA
1LQ1073-127	283.253	1495.48	1.93949	16.7744	12.9592	0.19793	14.9129	0.0240799	7.37918	0.494819	153.39	11.1853	183.373	25.0241	589.644	282.161	153.39	11.1853	NA
1LQ1073-119	495.075	49341.1	0.900314	20.4721	4.70259	0.185243	4.91756	0.0275044	1.43805	0.292432	174.911	2.48149	172.562	7.8041	140.472	110.459	174.911	2.48149	NA
1LQ1073-120	894.966	52280.4	1.88669	19.9583	1.87313	0.22638	2.5182	0.0327687	1.68306	0.668361	207.853	3.44251	207.206	4.71993	199.825	43.5208	207.853	3.44251	NA
1LQ1073-95	147.725	15419.8	0.73913	19.7679	10.7361	0.248094	10.9689	0.0355694	2.24778	0.204923	225.311	4.97702	225.027	22.1428	222.081	248.917	225.311	4.97702	NA
1LQ1073-140	64.0442	558.884	1.51032	12.8038	17.9604	0.388682	22.7121	0.0360937	13.902	0.612095	228.574	31.2198	333.406	64.6346	1149.47	359.485	228.574	31.2198	NA
1LQ1073-87	204.323	25547.8	2.89421	19.5934	7.78447	0.255671	7.94874	0.0363321	1.60764	0.202251	230.058	3.63328	231.173	16.4351	242.505	179.618	230.058	3.63328	NA
1LQ1073-32	90.3114	6835.86	1.46842	18.4607	13.9149	0.303027	14.2301	0.0405721	2.97824	0.209292	256.378	7.48574	268.761	33.6142	378.063	314.331	256.378	7.48574	NA
1LQ1073-2	254.014	20673	1.19415	19.5047	3.60288	0.296957	4.68065	0.0420079	2.98793	0.638357	265.267	7.76512	264.021	10.8823	252.999	82.901	265.267	7.76512	NA
1LQ1073-137	658.054	33030.6	1.20143	18.9135	1.74354	0.388001	4.50669	0.0532234	4.15576	0.922131	334.281	13.5379	332.908	12.7924	323.303	39.5859	334.281	13.5379	NA
1LQ1073-22	103.206	9699.56	2.25344	17.6592	10.341	0.429218	11.0229	0.0549728	3.81682	0.346262	344.98	12.8212	362.621	33.6252	477.042	229.165	344.98	12.8212	NA
1LQ1073-60	341.65	37849	3.09978	18.5644	2.77149	0.433655	3.60734	0.0583879	2.30905	0.640099	365.814	8.21165	365.768	11.0798	365.455	62.4769	365.814	8.21165	NA
1LQ1073-43	225.14	34212	1.22302	18.1664	3.07455	0.526873	3.68663	0.0694183	2.0343	0.551806	432.65	8.51257	429.732	12.9177	414.095	68.7327	432.65	8.51257	104.481
1LQ1073-84	244.784	1963.49	1.15696	16.5447	4.04364	0.620519	5.35576	0.0744583	3.51187	0.655717	462.96	15.6885	490.172	20.8263	619.424	87.2835	462.96	15.6885	74.7404
1LQ1073-16	1512.11	42302.2	3.94908	17.1477	0.529418	0.624593	1.92115	0.0776789	1.84676	0.96128	482.253	8.58108	492.722	7.49982	541.702	11.5643	482.253	8.58108	89.0255
1LQ1073-107	54.8166	3459.96	1.8207	16.4858	11.594	0.667515	12.0777	0.0798124	3.38389	0.280176	495.003	16.1234	519.201	49.1299	627.114	250.67	495.003	16.1234	78.9335
1LQ1073-78	128.187	70485.2	0.37263	17.0505	5.22979	0.660962	5.78241	0.0817358	2.46689	0.42662	506.475	12.016	515.202	23.3686	554.122	114.2	506.475	12.016	91.4014
1LQ1073-75	174.262	45303.2	1.51281	17.3428	5.30104	0.6581	5.43673	0.0827772	1.20709	0.222025	512.678	5.94881	513.451	21.9137	516.871	116.491	512.678	5.94881	99.1889
1LQ1073-121	270.144	47141.9	1.30006	17.4603	2.69041	0.659191	3.44635	0.0834761	2.15384	0.624963	516.838	10.6973	514.119	13.9037	502.032	59.2552	516.838	10.6973	102.949
1LQ1073-105	236.896	29378.6	1.23435	17.5141	2.29838	0.662779	3.86612	0.0841892	3.10876	0.804102	521.079	15.5617	516.313	15.6486	495.293	50.6598	521.079	15.5617	105.206
1LQ1073-139	279.412	1928.72	2.00739	19.5488	7.88085	0.59489	8.1718	0.084344	2.16112	0.264461	522	10.8364	473.986	30.9591	247.77	181.659	522	10.8364	210.68
1LQ1073-70	228.947	53069.6	2.36687	17.038	2.78494	0.685342	2.96605	0.0846887	1.02058	0.344086	524.048	5.13671	529.998	12.2476	555.719	60.7484	524.048	5.13671	94.301
1LQ1073-9	15.8472	2808.87	15.3199	22.7857	42.4932	0.519052	42.8673	0.0857771	5.65139	0.131834	530.514	28.7811	424.518	149.806	-116.992	1091.08	530.514	28.7811	NA
1LQ1073-18	949.56	104339	0.884392	17.3276	0.421915	0.68983	1.10775	0.0866921	1.02426	0.924627	535.944	5.26745	532.698	4.59171	518.8	9.26644	535.944	5.26745	103.304
1LQ1073-116	64.4754	5401.97	1.29382	17.4992	6.98767	0.686458	8.34133	0.0871227	4.55524	0.546105	538.498	23.5334	530.67	34.4882	497.166	154.103	538.498	23.5334	108.314
1LQ1073-125	78.6829	7025.19	0.577319	17.1197	9.13638	0.717577	9.325	0.0890973	1.86603	0.20011	550.196	9.84089	549.235	39.5777	545.242	200.001	550.196	9.84089	100.909
1LQ1073-38	162.486	28914.7	1.11056	17.0631	3.13112	0.721844	3.47567	0.0893305	1.50876	0.434092	551.576	7.97589	551.755	14.7962	552.482	68.3305	551.576	7.97589	99.8361
1LQ1073-47	106.58	4663.99	1.52764	18.2761	7.09892	0.682668	7.43506	0.0904883	2.21031	0.297282	558.424	11.8234	528.386	30.6378	400.623	159.196	558.424	11.8234	139.389
1LQ1073-64	110.222	30284.8	1.47491	17.411	3.34715	0.738597	4.22581	0.0932677	2.57954	0.610426	574.834	14.1862	561.587	18.2304	508.29	73.6295	574.834	14.1862	113.092
1LQ1073-81	305.052	56922.6	4.3946	16.8436	1.69648	0.76923	2.40133	0.0939704	1.69951	0.707737	578.976	9.41082	579.321	10.6016	580.668	36.8417	578.976	9.41082	99.7086
1LQ1073-90	239.302	85100	0.923003	17.0565	1.23418	0.765611	2.12275	0.09471	1.7271	0.813613	583.333	9.63236	577.242	9.34662	553.32	26.9334	583.333	9.63236	105.424
1LQ1073-92	287.995	43294	0.769132	16.6733	1.16756	0.786422	2.57725	0.0950989	2.29762	0.891498	585.622	12.8623	589.14	11.5207	602.697	25.2584	585.622	12.8623	97.167
1LQ1073-99	327.033	98801	7.25372	16.8323	2.13951	0.796095	2.71631	0.0971869	1.67356	0.616117	597.902	9.55625	594.624	12.2255	582.139	46.4668	597.902	9.55625	102.708
1LQ1073-71	169.555	54379.3	2.10544	16.6935	2.34791	0.812888	3.47752	0.0984186	2.56525	0.737665	605.134	14.8169	604.073	15.8341	600.071	50.8283	605.134	14.8169	100.844
1LQ1073-37	335.195	69354.8	1.82072	16.621	1.63331	0.821546	2.00224	0.099035	1.15812	0.578415	608.751	6.72745	608.911	9.16957	609.484	35.3176	608.751	6.72745	99.8797
1LQ1073-12	108.429	42928	2.4969	16.195	2.60808	0.937906	3.62677	0.110164	2.5202	0.694888	673.699	16.1215	671.786	17.8247	665.393	55.8653	673.699	16.1215	101.248
1LQ1073-28	49.224	11865.3	1.32182	15.6014	7.41066	0.985871	7.7601	0.111553	2.30243	0.296701	681.762	14.8956	696.611	39.1364	744.808	156.853	681.762	14.8956	91.5353
1LQ1073-26	64.39	17232.7	1.01122	14.8302	4.52169	1.27652	8.61258	0.137301	7.33013	0.851096	829.383	57.048	835.303	49.0746	851.071	94.031	851.071	94.031	97.4517
1LQ1073-39	100.605	18420.9	1.52661	14.5622	3.49955	1.3726	3.78184	0.144967	1.4337	0.379102	872.689	11.7018	877.277	22.2189	888.873	72.3206	888.873	72.3206	98.1792
1LQ1073-65	83.2774	50657.9	1.949	14.4895	2.13714	1.37366	3.65355	0.144354	2.96328	0.81107	869.236	24.0969	877.729	21.4719	899.19	44.0674	899.19	44.0674	96.6688
1LQ1073-77	138.473	39132.8	1.71552	14.4194	1.71109	1.45066	2.1615	0.15171	1.3207	0.611011	910.542	11.2149	910.148	12.9925	909.173	35.2222	909.173	35.2222	100.151
1LQ1073-54	65.6408	30671.7	1.28263	14.3498	3.93269	1.4799	4.41096	0.154019	1.99762	0.452877	923.456	17.1868	922.188	26.7338	919.177	80.8957	919.177	80.8957	100.466
1LQ1073-42	115.987	17345.7	0.52213	14.2833	3.0698	1.39765	5.14235	0.144785	4.12554	0.802267	871.666	33.636	887.942	30.4463	928.688	63.0242	928.688	63.0242	93.86
1LQ1073-17	200.193	12570.5	2.81727	14.12	1.55942	1.59462	2.19047	0.163301	1.53829	0.702267	975.096	13.9205	968.106	13.6702	952.27	31.8954	952.27	31.8954	102.397
1LQ1073-41	258.336	62571	1.18209	13.9088	1.34127	1.54812	2.63217	0.156169	2.2648	0.86043	935.45	19.7207	949.744	16.2392	983.036	27.3111	983.036	27.3111	95.1593
1LQ1073-48	71.1393	15956.5	3.264	13.7793	4.02582	1.70894	4.69692	0.170787	2.41946	0.515116	1016.45	22.7518	1011.89	30.0952	1002.02	81.7635	1002.02	81.7635	101.44
1LQ1073-110	385.984	78788.9	2.0684	13.7522	1.04102	1.68093	3.10949	0.167656	2.93005	0.942294	999.186	27.1208	1001.33	19.7988	1006.02	21.1044	1006.02	21.1044	99.3204
1LQ1073-67	188.806	56721.6	5.31941	13.625	0.729016	1.71144	1.28055	0.169121	1.05278	0.822131	1007.27	9.81735	1012.83	8.20727	1024.85	14.7503	1024.85	14.7503	98.2842
1LQ1073-63	93.4875	42249.3	1.02115	13.3748	2.00764	1.8937	3.117	0.183695	2.38433	0.764945	1087.13	23.8531	1078.88	20.715	1062.28	40.3928	1062.28	40.3928	102.339
1LQ1073-11	140.079	39184.7	0.643157	13.3679	1.37509	1.91216	1.9847	0.185391	1.43113	0.721084	1096.36	14.4286	1085.34	13.233	1063.31	27.6611	1063.31	27.6611	103.108
1LQ1073-20	204.444	45201.3	0.916375	13.0509	0.793896	1.99396	1.76603	0.188737	1.57753	0.893262	1114.53	16.1461	1113.47	11.9432	1111.37	15.8368	1111.37	15.8368	100.284
1LQ1073-86	117.806	50743.7	0.650101	12.9831	1.31697	2.0354	1.9314	0.191659	1.41276	0.731469	1130.36	14.6475	1127.43	13.151	1121.77	26.2619	1121.77	26.2619	100.766
1LQ1073-89	128.022	39793.1	2.20571	12.8789	2.04563	2.00081	3.32202	0.186889	2.61748	0.787919	1104.5	26.5692	1115.79	22.4942	1137.86	40.7002	1137.86	40.7002	97.0682
1LQ1073-35	51.4672	21104.1	1.32439	12.8647	3.79007	2.06426	4.55728	0.192603	2.53064	0.555296	1135.46	26.3462	1137.03	31.1825	1140.02	75.3964	1140.02	75.3964	99.6004
1LQ1073-113	368.545	93279.8	1.63625	12.7649	2.05787	1.61932	4.14438	0.149917	3.59737	0.868011	900.499	30.2337	977.729	26.0213	1155.48	40.836	1155.48	40.836	77.9328
1LQ1073-31	185.745	27048.1	1.05631	12.7161	2.74445	2.08342	4.58399	0.192144	3.67165	0.800972	1132.98	38.149	1143.36	31.4598	1163.09	54.4194	1163.09	54.4194	97.4116
1LQ1073-74	137.922	82936.1	0.681247	12.6642	2.29955	2.05128	4.17062	0.188409	3.47939	0.834262	1112.75	35.56	1132.72	28.4766	1171.22	45.5146	1171.22	45.5146	95.0076
1LQ1073-72	239.091	90781.2	0.959285	12.6468	0.768594	2.21453	1.74935	0.203124	1.57146	0.898311	1192.08	17.103	1185.64	12.2375	1173.94	15.2276	1173.94	15.2276	101.545
1LQ1073-124	28.106	10275.1	0.935843	12.6353	7.71268	2.11152	8.35793	0.193498	3.22018	0.385284	1140.3	33.6557	1152.57	57.6524	1175.75	152.802	1175.75	152.802	96.9851
1LQ1073-118	304.613	88567.4	2.50958	12.5564	0.736989	2.17448	2.01768	0.198024	1.87827	0.930903	1164.69	20.0137	1172.91	14.0344	1188.13	14.5445	1188.13	14.5445	98.0275
1LQ1073-51	131.423	79563.8	1.37987	12.5149	0.965972	2.18503	2.17282	0.198328	1.94629	0.895744	1166.33	20.7652	1176.28	15.1367	1194.62	19.0395	1194.62	19.0395	97.632
1LQ1073-73	78.6018	3012.57	1.18921	12.2019	4.92029	2.27664	5.66158	0.201475	2.80075	0.494694	1183.24	30.2763	1205.08	39.9629	1244.4	96.4339	1244.4	96.4339	95.085
1LQ1073-141	194.46	13249.4	1.99366	12.1915	1.51166	2.31526	4.23848	0.204718	3.95975	0.934237	1200.61	43.3773	1216.97	30.0642	1246.12	29.5993	1246.12	29.5993	96.3482
1LQ1073-58	230.779	10328.9	0.76879	12.053	0.907142	2.31349	8.95595	0.202237	8.90989	0.994857	1187.33	96.626	1216.43	63.5756	1268.43	17.7008	1268.43	17.7008	93.6062
1LQ1073-88	131.129	77019.5	1.50001	11.7991	0.79789	2.51583	1.95612	0.215292	1.786	0.913029	1256.95	20.3961	1276.62	14.2137	1309.86	15.4846	1309.86	15.4846	95.9607
1LQ1073-24	52.1431	21043.5	1.74571	11.141	3.13129	3.09583	3.46817	0.25015	1.49105	0.429924	1439.25	19.2331	1431.66	26.6235	1420.38	59.8589	1420.38	59.8589	101.328
1LQ1073-66	80.7556	35459.6	1.12347	11.0121	1.17726	3.11115	1.69768	0.24848	1.22318	0.720501	1430.63	15.6935	1435.45	13.0457	1442.58	22.4324	1442.58	22.4324	99.172
1LQ1073-100	107.245	92882.2	1.57515	10.6457	1.17223	3.39394	1.50526	0.262046	0.944302	0.627333	1500.3	12.6396	1503	11.8063	1506.78	22.1434	1506.78	22.1434	99.5702
1LQ1073-3	102.171	89034.4	1.85482	10.629	1.1691	3.44611	2.14695	0.265658	1.80073	0.838736	1518.72	24.3655	1514.98	16.8982	1509.74	22.0755	1509.74	22.0755	100.595
1LQ1073-53	120.629	73843.9	1.30856	10.1608	0.741058	3.80664	2.00329	0.280525	1.86118	0.929063	1594	26.284	1594.15	16.1105	1594.33	13.839	1594.33	13.839	99.9797
1LQ1073-30	150.929	92390.9	0.905459	10.1518	0.763229	3.7241	1.08751	0.274198	0.7747	0.712361	1562.08	10.7468	1576.56	8.70515	1595.99	14.2499	1595.99	14.2499	97.8753
1LQ1073-57	205.332	240071	2.32026	9.89215	0.821825	4.09753	3.0228	0.293975	2.90894	0.962332	1661.36	42.6034	1653.81	24.6767	1644.21	15.2487	1644.21	15.2487	101.043
1LQ1073-29	268.503	138580	2.21862	9.88136	0.336747	3.88094	1.6551	0.278133	1.62048	0.979083	1581.95	22.7322	1609.73	13.3633	1646.24	6.24653	1646.24	6.24653	96.0953
1LQ1073-21	487.541	253912	2.4363	9.51656	0.160834	4.50824	1.70231	0.311161	1.6947	0.995527	1746.42	25.9264	1732.49	14.1479	1715.7	2.95721	1715.7	2.95721	101.791
1LQ1073-106	10.431	5215.66	1.10493	9.19011	7.26718	4.63343	9.967	0.308832	6.82122	0.684381	1734.95	103.766	1755.31	83.4256	1779.62	132.727	1779.62	132.727	97.4902
1LQ1073-97	303.384	310784	1.72311	8.76975	0.216299	5.3755	1.31694	0.341904	1.29906	0.98642	1895.82	21.3369	1880.96	11.2751	1864.57	3.9048	1864.57	3.9048	101.676
1LQ1073-49	270.312	184755	2.19252	6.33596	0.440789	9.96288	4.80368	0.457822	4.78342	0.995781	2429.93	96.8459	2431.35	44.3548	2432.52	7.47152	2432.52	7.47152	99.8936
1LQ1073-61	136.243	338420	1.10847	6.11938	0.288238	10.7308	3.10203	0.476254	3.08861	0.995674	2510.93	64.2353	2500.1	28.8202	2491.29	4.85676	2491.29	4.85676	100.788
1LQ1073-98	253.243	221921	1.18325	6.05862	0.322674	10.28	1.87225	0.451714	1.84424	0.985037	2402.87	36.9932	2460.3	17.3269	2508.09	5.425	2508.09	5.425	95.8046
1LQ1073-68	156.194	141340	1.41879	6.04089	0.324333	10.4199	1.33058	0.456523	1.29045	0.969837	2424.19	26.0739	2472.82	12.328	2513.02	5.45033	2513.02	5.45033	96.4652
1LQ1073-108	589.737	323334	2.17942	5.78164	0.676224	8.40403	3.88336	0.352401	3.82404	0.984722	1946.05	64.2372	2275.61	35.2522	2586.49	11.2849	2586.49	11.2849	75.2391
1LQ1073-25	494.774	496734	1.44678	5.56655	0.119001	11.1932	2.20042	0.451898	2.1972	0.998537	2403.68	44.0857	2539.35	20.5131	2649.58	1.97451	2649.58	1.97451	90.7195
1LQ1073-36	555.913	164376	1.8121	5.34212	0.0956437	13.1204	0.760652	0.508347	0.754615	0.992063	2649.57	16.3947	2688.35	7.17667	2717.63	1.57678	2717.63	1.57678	97.4955
Sample:	1LQ-BT0		N29.12716	E88.56223
1LQBT0-84	188.372	5860.03	0.865638	22.2194	14.3567	0.0775225	14.6281	0.0124928	2.80463	0.191729	80.0347	2.2308	75.813	10.6865	-55.3219	351.242	80.0347	2.2308	NA
1LQBT0-35	452.17	26451.1	1.04622	20.8473	4.84212	0.0864067	5.21114	0.0130646	1.92608	0.369609	83.6745	1.60123	84.1505	4.20843	97.702	114.646	83.6745	1.60123	NA
1LQBT0-104	138.174	18913	1.47733	21.452	12.4049	0.0884409	13.5318	0.01376	5.4062	0.399519	88.0982	4.73037	86.05	11.1648	29.6078	298.287	88.0982	4.73037	NA
1LQBT0-31	129.113	9815.85	1.18374	21.0938	10.7723	0.0902085	11.8554	0.0138007	4.95074	0.417592	88.3565	4.34446	87.6975	9.96091	69.8175	256.891	88.3565	4.34446	NA
1LQBT0-15	124.671	1380.89	1.05371	24.4559	26.0152	0.0787775	27.093	0.0139729	7.56555	0.279244	89.4513	6.72075	76.9949	20.0916	-294.44	673.603	89.4513	6.72075	NA
1LQBT0-93	115.029	7523.8	1.06298	19.7867	23.6263	0.097581	24.6307	0.0140035	6.96223	0.282664	89.6464	6.19819	94.5409	22.2385	219.857	553.454	89.6464	6.19819	NA
1LQBT0-29	176.478	1877.36	0.808389	19.868	15.532	0.0990236	16.147	0.014269	4.4137	0.273345	91.3335	4.00277	95.8747	14.7735	210.343	361.896	91.3335	4.00277	NA
1LQBT0-26	149.051	11313.9	1.15764	20.1838	13.2841	0.0980269	14.0807	0.0143498	4.66881	0.331575	91.8474	4.25778	94.9534	12.7647	173.67	311.149	91.8474	4.25778	NA
1LQBT0-87	143.555	3270.04	1.00023	19.271	16.2492	0.102749	16.377	0.0143608	2.04221	0.1247	91.9175	1.86383	99.3104	15.4952	280.647	374.021	91.9175	1.86383	NA
1LQBT0-11	182.826	6085.58	1.00705	21.7106	12.9804	0.091369	13.1862	0.014387	2.32085	0.176006	92.0837	2.12194	88.7779	11.2098	0.755053	313.944	92.0837	2.12194	NA
1LQBT0-75	398.51	6053.55	0.53417	20.411	7.00237	0.0973861	7.85504	0.0144165	3.55928	0.453121	92.2712	3.2608	94.3607	7.0782	147.522	164.358	92.2712	3.2608	NA
1LQBT0-64	199.765	11805.8	0.926811	22.2641	13.7396	0.0892941	13.9333	0.0144187	2.3153	0.166169	92.2854	2.12146	86.8456	11.598	-60.2221	336.332	92.2854	2.12146	NA
1LQBT0-73	158.02	8668.65	0.894239	23.3055	16.3135	0.0870699	16.4654	0.0147172	2.23136	0.135518	94.182	2.08626	84.7702	13.3918	-172.91	408.809	94.182	2.08626	NA
1LQBT0-52	920.565	97109	0.334464	20.6177	2.59977	0.0985448	2.67023	0.0147357	0.609365	0.228207	94.2995	0.570446	95.4322	2.43218	123.81	61.2321	94.2995	0.570446	NA
1LQBT0-82	168.683	31709.8	0.631894	21.8481	15.8963	0.0956618	16.2347	0.0151583	3.29771	0.203127	96.9836	3.1743	92.764	14.3935	-14.4301	386.258	96.9836	3.1743	NA
1LQBT0-25	100.046	7324.75	0.90758	20.0819	19.5259	0.106153	19.778	0.0154609	3.14738	0.159135	98.9048	3.08915	102.44	19.2744	185.465	458.418	98.9048	3.08915	NA
1LQBT0-6	400.744	44735.9	1.07442	21.0787	6.1166	0.102175	6.7281	0.0156202	2.80258	0.416549	99.9162	2.77864	98.7823	6.3332	71.4776	145.553	99.9162	2.77864	NA
1LQBT0-16	292.606	17068.1	0.645459	20.6787	7.74077	0.104834	7.94618	0.0157226	1.79508	0.225904	100.566	1.79123	101.229	7.65603	116.88	182.754	100.566	1.79123	NA
1LQBT0-4	202.079	15908.4	3.42292	21.2312	11.8899	0.103881	13.1037	0.015996	5.50804	0.420342	102.301	5.59029	100.353	12.5216	54.3448	284.498	102.301	5.59029	NA
1LQBT0-33	102.128	8770.34	1.0356	26.5204	30.9499	0.0845912	31.8916	0.0162706	7.69269	0.241214	104.043	7.93948	82.4523	25.2613	-505.812	841.436	104.043	7.93948	NA
1LQBT0-67	1489.95	12195	0.502078	20.0289	2.41697	0.116305	2.79528	0.0168949	1.40423	0.502355	108.001	1.50395	111.717	2.95715	191.663	56.2331	108.001	1.50395	NA
1LQBT0-20	32.1512	4091.25	1.06177	18.6436	49.3734	0.12679	49.8802	0.0171441	7.09241	0.142189	109.581	7.70627	121.209	57.0502	355.889	1184.34	109.581	7.70627	NA
1LQBT0-90	47.8634	127.659	0.851166	10.6575	23.7139	0.238348	24.4416	0.0184232	5.91979	0.242202	117.683	6.90338	217.067	47.8023	1504.69	454.595	117.683	6.90338	NA
1LQBT0-27	372.604	54279.2	0.606595	20.4182	3.17365	0.128939	3.46088	0.0190942	1.38045	0.398872	121.929	1.66735	123.144	4.01359	146.697	74.4605	121.929	1.66735	NA
1LQBT0-59	88.9951	4812.56	0.757188	23.1133	21.9632	0.117182	23.0533	0.0196435	7.00496	0.30386	125.403	8.69952	112.514	24.5574	-152.305	550.711	125.403	8.69952	NA
1LQBT0-34	330.383	45584.1	1.14216	20.9053	4.89629	0.13087	5.25468	0.0198424	1.90734	0.362979	126.66	2.39225	124.879	6.17459	91.1119	116.054	126.66	2.39225	NA
1LQBT0-37	601.878	33162.5	0.494776	20.2746	3.4177	0.135397	3.58172	0.0199095	1.07145	0.299145	127.084	1.34831	128.936	4.33697	163.185	79.9426	127.084	1.34831	NA
1LQBT0-65	76.9127	6414.33	0.929065	25.3306	32.9973	0.112155	33.3231	0.0206045	4.64881	0.139507	131.475	6.05014	107.935	34.1344	-384.974	877.861	131.475	6.05014	NA
1LQBT0-13	424.963	46245.3	1.31413	21.0726	4.98897	0.134852	5.1437	0.0206099	1.2521	0.243424	131.509	1.62994	128.449	6.20626	72.1977	118.691	131.509	1.62994	NA
1LQBT0-58	92.0032	3055.65	0.978366	19.9351	17.6438	0.142605	18.6893	0.0206182	6.16355	0.329789	131.562	8.02671	135.362	23.6887	202.551	412.325	131.562	8.02671	NA
1LQBT0-98	92.4767	12815.1	0.986616	27.4318	54.6243	0.105031	54.6975	0.0208964	2.82809	0.0517042	133.319	3.73165	101.41	52.8364	-596.724	1588.43	133.319	3.73165	NA
1LQBT0-70	1003.01	38453.7	1.55689	19.7533	4.33125	0.1584	4.95711	0.0226931	2.41107	0.486386	144.654	3.44886	149.301	6.88274	223.746	100.203	144.654	3.44886	NA
1LQBT0-42	613.088	64477.7	1.01325	20.2943	2.51568	0.155481	4.64611	0.022885	3.90611	0.840727	145.863	5.63361	146.74	6.34805	160.947	58.8522	145.863	5.63361	NA
1LQBT0-95	44.6164	270.378	1.39028	16.2261	51.8875	0.194883	52.4897	0.0229343	7.92823	0.151044	146.174	11.4586	180.787	87.1399	661.274	1193.07	146.174	11.4586	NA
1LQBT0-88	463.061	105460	0.882523	20.0939	5.40527	0.163541	5.59598	0.0238337	1.44847	0.25884	151.839	2.17364	153.798	7.98657	184.07	125.964	151.839	2.17364	NA
1LQBT0-41	106.379	11427.8	1.26	19.8187	11.676	0.16908	12.4999	0.0243033	4.46299	0.357041	154.796	6.82624	158.62	18.3583	216.098	271.132	154.796	6.82624	NA
1LQBT0-54	655.328	58834.4	4.79767	20.2876	1.96245	0.165996	2.60254	0.0244246	1.70938	0.656814	155.559	2.62728	155.938	3.7621	161.724	45.8957	155.559	2.62728	NA
1LQBT0-71	229.263	6921.27	1.69663	20.5756	7.62462	0.163729	7.97348	0.024433	2.33273	0.292561	155.612	3.58654	153.962	11.3912	128.657	179.603	155.612	3.58654	NA
1LQBT0-97	204.228	8367.22	1.08563	20.6737	11.1372	0.169827	13.3662	0.0254639	7.39038	0.552916	162.096	11.8301	159.269	19.705	117.457	263.271	162.096	11.8301	NA
1LQBT0-50	326.361	51136.3	0.971994	19.9612	2.29995	0.176343	2.89251	0.0255296	1.7541	0.606428	162.509	2.81494	164.909	4.40284	199.486	53.402	162.509	2.81494	NA
1LQBT0-89	146.734	14526.2	0.740977	19.6044	11.4597	0.186701	11.753	0.026546	2.60903	0.221989	168.895	4.34929	173.811	18.7773	241.244	264.866	168.895	4.34929	NA
1LQBT0-5	1043.73	168759	1.65974	19.8119	1.0077	0.215666	1.56729	0.030989	1.20038	0.765899	196.735	2.3259	198.296	2.82323	216.895	23.3185	196.735	2.3259	NA
1LQBT0-76	391.4	81115	0.837765	19.8409	2.56067	0.219557	2.77625	0.0315942	1.07263	0.386359	200.518	2.11771	201.541	5.07502	213.551	59.3052	200.518	2.11771	NA
1LQBT0-47	196.445	22141.3	0.759951	19.2203	4.41636	0.226657	4.50104	0.0315958	0.868989	0.193064	200.528	1.71574	207.435	8.44499	286.653	101.006	200.528	1.71574	NA
1LQBT0-22	752.91	30106.9	0.572705	19.9579	1.29834	0.222148	1.62347	0.0321555	0.974664	0.600358	204.025	1.95742	203.696	2.99636	199.909	30.1526	204.025	1.95742	NA
1LQBT0-79	471.738	56292.5	0.938551	19.704	2.13061	0.238265	3.93334	0.0340498	3.30631	0.840585	215.845	7.01836	216.999	7.68506	229.515	49.2401	215.845	7.01836	NA
1LQBT0-103	520.081	82589	2.08551	19.839	2.07836	0.259202	3.29473	0.0372955	2.55649	0.775934	236.047	5.92539	234.024	6.88651	213.772	48.1487	236.047	5.92539	NA
1LQBT0-28	175.392	45272.2	1.02223	19.5887	4.80787	0.270838	6.18862	0.0384782	3.89659	0.629638	243.393	9.30723	243.364	13.3927	243.1	110.827	243.393	9.30723	NA
1LQBT0-96	78.0902	14047.5	1.06993	20.4097	8.4734	0.272679	8.67506	0.0403634	1.85963	0.214365	255.085	4.65103	244.834	18.8749	147.629	198.957	255.085	4.65103	NA
1LQBT0-39	168.865	23868.6	0.949579	18.9357	5.57542	0.312416	5.74286	0.0429055	1.37667	0.239718	270.818	3.65103	276.052	13.8819	320.681	126.751	270.818	3.65103	NA
1LQBT0-21	541.396	55367.9	1.44582	19.0176	1.72475	0.336383	2.08421	0.0463968	1.17013	0.561424	292.362	3.34459	294.428	5.32696	310.839	39.266	292.362	3.34459	NA
1LQBT0-61	591.307	27707.3	1.9292	18.2679	2.31942	0.357967	4.2947	0.0474275	3.61452	0.841623	298.708	10.5505	310.696	11.4957	401.633	51.9602	298.708	10.5505	NA
1LQBT0-78	597.15	154635	4.4069	15.5004	2.22097	0.554684	3.63375	0.0623572	2.87602	0.791472	389.945	10.8824	448.06	13.1648	758.523	46.845	389.945	10.8824	NA
1LQBT0-48	95.4728	25794.2	1.08592	17.8634	3.43268	0.530322	3.94344	0.0687074	1.94098	0.492206	428.363	8.04423	432.023	13.8768	451.564	76.266	428.363	8.04423	94.8621
1LQBT0-80	633.258	92465.2	3.47583	17.8052	0.834118	0.564629	3.31529	0.0729137	3.20864	0.967832	453.686	14.0567	454.535	12.1485	458.834	18.4994	453.686	14.0567	98.8779
1LQBT0-99	7.71028	3107.63	2.26342	15.3859	82.3311	0.689356	82.7184	0.0769248	7.99555	0.0966598	477.741	36.8173	532.413	356.717	774.135	2220.28	477.741	36.8173	61.7128
1LQBT0-8	1250.14	29973.3	3.74079	16.9774	2.83205	0.639118	3.00829	0.0786955	1.01456	0.337254	488.332	4.7714	501.76	11.9108	563.454	61.705	488.332	4.7714	86.6675
1LQBT0-9	510.313	209969	8.28364	16.3612	1.40343	0.798586	2.09946	0.0947625	1.56145	0.743738	583.642	8.71289	596.031	9.46543	643.485	30.1829	583.642	8.71289	90.7001
1LQBT0-19	157.697	154138	1.73979	16.8272	1.13411	0.795218	1.95858	0.09705	1.59682	0.815295	597.098	9.10635	594.128	8.8095	582.823	24.6234	597.098	9.10635	102.449
1LQBT0-85	138.301	44608.2	1.20866	16.064	1.32109	0.965642	2.00677	0.112504	1.51057	0.752741	687.274	9.84753	686.215	10.0104	682.725	28.2148	687.274	9.84753	100.666
1LQBT0-1	492.977	362690	3.98725	15.9856	0.59008	0.975235	1.20634	0.113067	1.05216	0.872199	690.538	6.88998	691.159	6.04775	693.16	12.5798	690.538	6.88998	99.6217
1LQBT0-63	92.6523	27468.5	1.67808	15.7017	2.13554	1.04569	2.28443	0.119083	0.811235	0.355115	725.281	5.56482	726.745	11.8574	731.285	45.2286	725.281	5.56482	99.1789
1LQBT0-7	27.4883	11893.1	1.44045	15.1731	9.80761	1.18093	10.2034	0.129956	2.81442	0.275831	787.616	20.8662	791.747	56.1567	803.379	205.845	787.616	20.8662	98.038
1LQBT0-92	123.754	110536	2.33503	13.8394	1.62814	1.61251	1.9304	0.161853	1.03712	0.537255	967.064	9.31352	975.084	12.0988	993.182	33.081	993.182	33.081	97.3702
1LQBT0-51	108.012	72595	2.30442	13.2643	1.199	1.84539	1.6842	0.17753	1.18276	0.702271	1053.47	11.4952	1061.79	11.0914	1078.93	24.0619	1078.93	24.0619	97.6403
1LQBT0-81	39.5156	11865.4	0.853124	13.0796	4.50724	1.90019	4.67529	0.180256	1.24223	0.2657	1068.37	12.2302	1081.16	31.1132	1107.02	90.1169	1107.02	90.1169	96.5091
1LQBT0-32	175.59	67890.3	1.53692	13.009	0.795409	1.91932	1.23629	0.181088	0.946432	0.765543	1072.92	9.35439	1087.83	8.25325	1117.83	15.8507	1117.83	15.8507	95.9818
1LQBT0-101	49.5419	40187.3	0.617995	12.8321	2.51939	2.1215	2.70194	0.197443	0.976285	0.361328	1161.57	10.3772	1155.83	18.6481	1145.09	50.055	1145.09	50.055	101.439
1LQBT0-102	755.048	101744	3.21699	12.7843	0.212035	2.06208	0.806141	0.191198	0.777756	0.964789	1127.86	8.04749	1136.31	5.51232	1152.47	4.20363	1152.47	4.20363	97.8647
1LQBT0-44	41.6026	44022.6	0.567584	12.7683	3.62255	2.11041	3.72403	0.195434	0.863422	0.231852	1150.74	9.09947	1152.21	25.6616	1154.95	71.9062	1154.95	71.9062	99.6356
1LQBT0-56	66.0834	94011.6	0.705313	12.7614	1.93646	2.12521	3.99839	0.196698	3.49818	0.874897	1157.56	37.0664	1157.03	27.615	1156.03	38.4133	1156.03	38.4133	100.132
1LQBT0-43	71.6405	50871.6	0.416317	12.7549	1.939	2.11417	2.26269	0.195575	1.16622	0.515413	1151.51	12.2981	1153.44	15.5987	1157.04	38.4494	1157.04	38.4494	99.5214
1LQBT0-77	48.1874	56235.8	0.802818	12.6143	2.56662	2.12228	2.7801	0.194162	1.06838	0.384294	1143.88	11.1981	1156.08	19.1899	1179.03	50.7603	1179.03	50.7603	97.0186
1LQBT0-66	38.9798	58149.5	0.296988	12.6073	2.98768	2.19325	3.28103	0.200543	1.35607	0.413307	1178.24	14.6027	1178.9	22.886	1180.14	59.0661	1180.14	59.0661	99.8392
1LQBT0-45	87.6898	57749.3	1.33518	12.5599	1.5163	2.19028	1.91003	0.19952	1.16148	0.608099	1172.74	12.4541	1177.96	13.3157	1187.57	29.9568	1187.57	29.9568	98.7515
1LQBT0-2	86.4679	56917.2	0.566706	12.52	1.21101	2.20288	2.04306	0.200029	1.64546	0.805391	1175.48	17.6811	1181.96	14.2689	1193.85	23.914	1193.85	23.914	98.461
1LQBT0-100	67.0686	84088.4	0.878439	12.044	2.04081	2.56077	2.99864	0.223686	2.19703	0.732674	1301.32	25.8896	1289.51	21.9002	1269.91	39.815	1269.91	39.815	102.473
1LQBT0-105	86.5915	83613	1.40166	11.4053	0.931866	2.85595	1.6953	0.23624	1.41622	0.835379	1367.12	17.4462	1370.38	12.7503	1375.44	17.9203	1375.44	17.9203	99.3951
1LQBT0-91	113.941	70289.3	0.87139	11.139	0.648406	2.87496	2.60904	0.23226	2.52718	0.968626	1346.34	30.7065	1375.37	19.6575	1420.73	12.3915	1420.73	12.3915	94.7637
1LQBT0-3	144.194	210488	0.802413	10.7356	0.274922	3.31626	1.64921	0.258211	1.62614	0.986008	1480.68	21.5128	1484.89	12.8668	1490.88	5.20449	1490.88	5.20449	99.3161
1LQBT0-24	103.882	101715	0.76837	10.7075	0.954698	3.13976	3.22711	0.243827	3.08266	0.955238	1406.56	38.9557	1442.49	24.8572	1495.85	18.0616	1495.85	18.0616	94.0312
1LQBT0-12	262.909	196932	4.61239	10.5059	0.240752	3.53224	0.959524	0.269144	0.92883	0.968011	1536.45	12.6978	1534.46	7.59331	1531.7	4.53298	1531.7	4.53298	100.31
1LQBT0-18	293.424	47818	0.813707	10.2981	0.870156	3.69251	6.20107	0.275788	6.13972	0.990106	1570.12	85.5637	1569.75	49.5859	1569.24	16.3016	1569.24	16.3016	100.056
1LQBT0-53	106.509	149345	1.19719	9.99902	0.601931	4.09268	1.69546	0.2968	1.58502	0.934857	1675.42	23.3854	1652.84	13.8359	1624.25	11.1957	1624.25	11.1957	103.151
1LQBT0-49	84.4252	163135	1.10991	9.50235	0.642843	4.51085	2.13812	0.310877	2.03919	0.953732	1745.02	31.175	1732.97	17.7724	1718.44	11.8158	1718.44	11.8158	101.546
1LQBT0-69	382.477	34089.4	1.00317	9.20274	0.343731	4.73328	0.900646	0.315921	0.832474	0.924307	1769.78	12.8836	1773.15	7.55007	1777.11	6.27004	1777.11	6.27004	99.5873
1LQBT0-94	30.2647	58220.1	0.758835	8.8927	1.77152	5.03008	2.08207	0.32442	1.09395	0.525415	1811.28	17.2742	1824.4	17.6368	1839.4	32.077	1839.4	32.077	98.4713
1LQBT0-17	309.873	245949	24.8376	8.71623	0.189945	5.30943	1.10426	0.335641	1.0878	0.985095	1865.67	17.622	1870.38	9.43565	1875.61	3.42446	1875.61	3.42446	99.47
1LQBT0-62	255.433	406799	2.80349	7.20376	3.09758	7.18935	3.30898	0.375619	1.16377	0.351699	2055.79	20.4849	2135.18	29.5044	2212.48	53.7401	2212.48	53.7401	92.9177
1LQBT0-86	60.843	124402	1.31465	6.00864	0.58216	10.9884	1.19737	0.47886	1.04632	0.873849	2522.3	21.8407	2522.15	11.1442	2522.01	9.77961	2522.01	9.77961	100.011
1LQBT0-55	218.444	188001	1.40556	5.77158	0.319717	10.7577	3.33565	0.450313	3.3203	0.995396	2396.65	66.4605	2502.42	30.9987	2589.4	5.33538	2589.4	5.33538	92.556
1LQBT0-57	148.026	214338	1.5326	5.38094	0.411077	12.514	1.92278	0.488376	1.87832	0.976879	2563.65	39.7315	2643.78	18.0808	2705.69	6.78473	2705.69	6.78473	94.7502
1LQBT0-38	230.783	537999	2.92625	4.84987	0.166883	15.6259	1.98813	0.549634	1.98111	0.996471	2823.65	45.2979	2854.2	18.9751	2875.83	2.71198	2875.83	2.71198	98.1855
Sample:	1LQ-BT1		N29.12716	E88.56223
1LQBT1-6	82.0637	3755.74	1.84924	26.3032	23.8809	0.0662468	24.5526	0.0126378	5.70347	0.232296	80.9582	4.58856	65.1315	15.4906	-483.939	641.06	80.9582	4.58856	NA
1LQBT1-2	391.115	10468.3	0.670828	19.3857	11.8307	0.102666	11.8958	0.0144347	1.24243	0.104443	92.3868	1.13965	99.2343	11.2467	267.037	272.245	92.3868	1.13965	NA
1LQBT1-3	676.284	48140.8	0.897155	20.3636	2.47161	0.169175	2.63699	0.0249856	0.919167	0.348567	159.088	1.44439	158.703	3.87434	152.942	57.8957	159.088	1.44439	NA
1LQBT1-4	266.915	18214.8	0.711023	17.2634	2.302	0.616781	3.62945	0.0772248	2.80601	0.773122	479.537	12.9675	487.828	14.0598	526.983	50.4617	479.537	12.9675	90.9966
1LQBT1-7	151.094	8289.66	2.18553	8.39964	0.488692	5.55689	0.613591	0.338525	0.371044	0.60471	1879.57	6.04935	1909.44	5.28015	1942.04	8.74115	1942.04	8.74115	96.7833
1LQBT1-5	130.718	450529	0.585282	7.15847	0.445582	7.32569	0.82393	0.380336	0.69305	0.841151	2077.85	12.3102	2151.95	7.36133	2223.41	7.71793	2223.41	7.71793	93.4533
Sample:	4LQ-173		N29.19842	E87.65741
LEARY-4LQ-173-30 <>	242.536	7252.52	1.48952	19.0467	28.9019	0.0597722	29.4065	0.0082569	5.42389	0.184445	53.0089	2.86335	58.947	16.8422	307.363	670.817	53.0089	2.86335	NA
LEARY-4LQ-173-6 <>	15.9667	1285.66	2.83121	0.124389	5470.37	19.9505	5470.41	0.0179984	19.7078	0.00360261	114.993	22.4617	3088.96	#NUM!	NA	NA	114.993	22.4617	NA
LEARY-4LQ-173-38 <>	37.6797	4247.98	2.51707	19.9321	43.2364	0.127901	45.3807	0.0184895	13.7849	0.303762	118.103	16.1322	122.21	52.2984	202.919	1048.69	118.103	16.1322	NA
LEARY-4LQ-173-15 <>	106.787	9059.01	2.58864	19.2602	37.7558	0.134641	38.118	0.0188077	5.24197	0.13752	120.116	6.23817	128.259	45.9594	281.937	892.944	120.116	6.23817	NA
LEARY-4LQ-173-25 <>	27.9292	3675.67	3.01751	9.03797	99.1173	0.287006	100.449	0.0188131	16.3038	0.162309	120.151	19.4077	256.2	231.374	1810.01	#VALUE!	120.151	19.4077	NA
LEARY-4LQ-173-29 <>	61.5404	6297.92	2.221	28.4657	77.2668	0.0912189	77.7843	0.0188324	8.9573	0.115156	120.272	10.6733	88.6382	66.1163	-698.316	2536.33	120.272	10.6733	NA
LEARY-4LQ-173-28 <>	185.701	24411.3	2.48337	17.6931	9.23017	0.147753	9.79847	0.0189601	3.28847	0.335611	121.08	3.94453	139.926	12.8085	472.83	204.619	121.08	3.94453	NA
LEARY-4LQ-173-13 <>	73.5112	5160.3	2.34244	19.4781	27.6688	0.134804	28.3684	0.0190435	6.26111	0.220707	121.608	7.54265	128.405	34.2302	256.092	647.003	121.608	7.54265	NA
LEARY-4LQ-173-22 <>	55.7204	3853.33	1.16921	2.77035	938.56	0.953881	938.609	0.0191658	9.56186	0.0101873	122.382	11.5916	680.121	#NUM!	3753.92	364.049	122.382	11.5916	NA
LEARY-4LQ-173-19 <>	177.255	14217	1.96979	21.6444	34.31	0.122243	34.4289	0.0191897	2.85806	0.0830134	122.533	3.46899	117.104	38.0973	8.11569	847.553	122.533	3.46899	NA
LEARY-4LQ-173-18 <>	109.64	23241.6	2.39818	23.9734	31.2141	0.110552	31.5606	0.0192218	4.66349	0.147763	122.736	5.66962	106.47	31.9113	-243.817	805.416	122.736	5.66962	NA
LEARY-4LQ-173-9 <>	309.158	53389.1	1.38034	19.9153	6.24835	0.133628	6.44315	0.0193012	1.57235	0.244035	123.238	1.91933	127.353	7.71195	204.873	145.084	123.238	1.91933	NA
LEARY-4LQ-173-21 <>	42.7331	3288.01	2.35475	27.3426	103.455	0.0976332	103.683	0.0193614	6.86844	0.0662445	123.619	8.40979	94.5893	93.9106	-587.89	1567.15	123.619	8.40979	NA
LEARY-4LQ-173-11 <>	70.5403	8914.61	2.73895	28.8552	74.0285	0.0928384	74.3358	0.019429	6.75195	0.0908305	124.046	8.29549	90.1441	64.2063	-736.198	2399.11	124.046	8.29549	NA
LEARY-4LQ-173-10 <>	181.357	20705	1.08435	21.0497	14.2161	0.127449	14.4726	0.0194572	2.71275	0.18744	124.224	3.33763	121.802	16.6132	74.7799	339.306	124.224	3.33763	NA
LEARY-4LQ-173-36 <>	111.016	17938.4	2.5322	20.7843	20.0042	0.129345	20.4669	0.0194978	4.32738	0.211434	124.481	5.3351	123.509	23.8059	104.837	476.852	124.481	5.3351	NA
LEARY-4LQ-173-8 <>	95.8489	8564	2.28797	28.5731	22.2619	0.0952389	22.5335	0.0197365	3.48823	0.154802	125.99	4.35217	92.372	19.8985	-708.781	625.433	125.99	4.35217	NA
LEARY-4LQ-173-16 <>	56.4449	3137.38	1.18979	18.3636	15.8741	0.148551	20.4937	0.0197848	12.9616	0.63247	126.295	16.2107	140.631	26.9201	389.918	358.307	126.295	16.2107	NA
LEARY-4LQ-173-5 <>	113.062	19647.4	1.97064	21.3228	18.2877	0.129068	20.4655	0.0199601	9.18682	0.448893	127.404	11.5895	123.26	23.7592	44.023	440.278	127.404	11.5895	NA
LEARY-4LQ-173-32 <>	39.1799	3395.84	2.89556	-7.57548	577.225	-0.369424	577.356	0.0202971	12.309	0.0213196	129.533	15.7852	-468.215	#NUM!	NA	NA	129.533	15.7852	NA
LEARY-4LQ-173-24 <>	140.607	13128.3	0.463685	23.2215	24.7337	0.123139	24.9784	0.0207389	3.48774	0.13963	132.324	4.56807	117.914	27.8142	-163.911	623.344	132.324	4.56807	NA
LEARY-4LQ-173-7 <>	87.6864	4681.59	2.23088	20.674	21.0888	0.139719	21.5167	0.0209497	4.2694	0.198423	133.655	5.64753	132.793	26.7893	117.421	502.058	133.655	5.64753	NA
LEARY-4LQ-173-3 <>	57.8571	8178.37	2.5757	21.0108	54.9446	0.13761	55.6726	0.0209697	8.9741	0.161194	133.781	11.882	130.913	68.4836	79.1429	1406.14	133.781	11.882	NA
LEARY-4LQ-173-4 <>	49.2805	2274.32	1.14956	22.7565	53.2529	0.133912	54.2174	0.0221015	10.1814	0.187788	140.924	14.1923	127.607	65.1033	-113.835	1404.09	140.924	14.1923	NA
LEARY-4LQ-173-33 <>	128.43	21173	0.37416	19.4275	23.8531	0.180967	28.2801	0.0254985	15.1919	0.537194	162.313	24.3507	168.892	44.0295	262.092	554.662	162.313	24.3507	NA
LEARY-4LQ-173-27 <>	398.392	173153	2.72941	8.762	0.406666	5.20311	2.94876	0.330648	2.92058	0.990445	1841.52	46.784	1853.13	25.1195	1866.16	7.34005	1866.16	7.34005	98.6795
Sample:	5LQ-196		N29.17325	E88.15549
LEARY-5LQ196-96 <>	861.948	22609.9	1.75632	20.7623	4.41813	0.0596641	4.77635	0.00898437	1.81484	0.379965	57.6584	1.04174	58.8435	2.73069	107.365	104.388	57.6584	1.04174	NA
LEARY-5LQ196-105 <>	988.663	62589.1	0.819538	20.7981	2.684	0.0872225	3.5062	0.0131568	2.25602	0.643436	84.261	1.88857	84.9127	2.85613	103.255	63.4379	84.261	1.88857	NA
LEARY-5LQ196-72 <>	118.411	8779.85	1.20832	20.0645	17.8157	0.0927899	18.0267	0.0135029	2.75009	0.152557	86.463	2.36194	90.099	15.5433	187.48	417.52	86.463	2.36194	NA
LEARY-5LQ196-16 <>	121.434	4244.31	1.13834	28.5863	37.0285	0.0668807	37.3606	0.0138662	4.97065	0.133045	88.7732	4.38236	65.735	23.7853	-710.069	1059.98	88.7732	4.38236	NA
LEARY-5LQ196-45 <>	108.739	3664.66	1.20565	29.1952	30.295	0.0666776	30.6654	0.0141186	4.75152	0.154947	90.3776	4.26435	65.5418	19.4661	-769.093	869.665	90.3776	4.26435	NA
LEARY-5LQ196-78 <>	672.59	36909.9	0.61817	20.9112	6.17006	0.0935848	6.24677	0.0141933	0.975941	0.156231	90.8527	0.880449	90.8373	5.42803	90.4382	146.331	90.8527	0.880449	NA
LEARY-5LQ196-1 <>	303.227	7836.63	0.718526	21.568	7.61745	0.0914732	8.31694	0.0143088	3.33855	0.401416	91.5868	3.03605	88.8748	7.07752	16.6132	183.236	91.5868	3.03605	NA
LEARY-5LQ196-65 <>	57.377	4785.57	0.659426	1.86218	1585.35	1.06543	1585.36	0.0143895	7.44777	0.00469783	92.0996	6.8106	736.496	#NUM!	NA	NA	92.0996	6.8106	NA
LEARY-5LQ196-61 <>	132.567	9608.32	1.0332	23.4135	26.9903	0.0854014	27.5138	0.0145021	5.34162	0.194143	92.8149	4.9223	83.2105	21.9848	-184.437	684.677	92.8149	4.9223	NA
LEARY-5LQ196-68 <>	267.391	24172.1	0.978244	17.3958	9.64616	0.115356	9.81637	0.0145541	1.82009	0.185413	93.1455	1.68314	110.853	10.3092	510.181	212.512	93.1455	1.68314	NA
LEARY-5LQ196-80 <>	102.034	2368.5	0.956101	16.0815	20.1528	0.124853	20.9116	0.0145622	5.58207	0.266937	93.1968	5.16489	119.462	23.5721	680.395	434.622	93.1968	5.16489	NA
LEARY-5LQ196-63 <>	222.067	2342.24	0.424578	19.645	13.7053	0.102284	14.0708	0.0145733	3.18645	0.226458	93.2678	2.95054	98.8827	13.2583	236.451	317.457	93.2678	2.95054	NA
LEARY-5LQ196-34 <>	345.275	21021.1	0.903137	20.5247	9.7004	0.0989903	10.1238	0.0147356	2.89709	0.286167	94.2986	2.71203	95.8439	9.25942	134.461	228.435	94.2986	2.71203	NA
LEARY-5LQ196-49 <>	154.694	7260.99	1.16239	15.314	12.06	0.133616	12.9375	0.0148404	4.68363	0.362019	94.9647	4.4152	127.342	15.4849	783.989	254.196	94.9647	4.4152	NA
LEARY-5LQ196-28 <>	117.055	3434.37	0.906455	21.0547	26.0714	0.0986414	26.6623	0.0150628	5.58205	0.209361	96.3771	5.3398	95.5214	24.3116	74.2033	628.928	96.3771	5.3398	NA
LEARY-5LQ196-66 <>	223.884	5110.22	1.29337	20.7284	12.8534	0.100945	13.3061	0.0151757	3.44127	0.258624	97.094	3.31623	97.648	12.3885	111.175	304.464	97.094	3.31623	NA
LEARY-5LQ196-52 <>	83.3021	5087.29	1.7835	25.3515	25.8356	0.0825973	26.3501	0.0151868	5.1816	0.196644	97.1647	4.99694	80.5839	20.416	-387.116	681.362	97.1647	4.99694	NA
LEARY-5LQ196-90 <>	51.877	2704.93	2.04014	21.0732	47.4463	0.0996214	47.9619	0.0152259	7.01354	0.146232	97.4126	6.78071	96.4268	44.1478	72.0959	1189.93	97.4126	6.78071	NA
LEARY-5LQ196-43 <>	83.475	2278.52	1.63546	34.874	32.6651	0.0609871	33.5464	0.0154255	7.63894	0.227713	98.6798	7.48069	60.1103	19.582	-1299.94	1058.37	98.6798	7.48069	NA
LEARY-5LQ196-100 <>	99.2083	14701.1	1.75698	19.0078	21.2684	0.112968	22.1931	0.0155734	6.33942	0.285648	99.619	6.26673	108.676	22.8767	311.994	488.902	99.619	6.26673	NA
LEARY-5LQ196-69 <>	82.7174	4162.39	0.942496	20.3463	24.9238	0.106552	25.6185	0.0157233	5.92528	0.231289	100.57	5.91284	102.806	25.053	154.965	591.593	100.57	5.91284	NA
LEARY-5LQ196-75 <>	63.0881	1282.18	1.6191	734.073	271.744	0.00300385	271.771	0.0159925	3.78724	0.0139354	102.279	3.84298	3.04549	8.26454	NA	NA	102.279	3.84298	NA
LEARY-5LQ196-26 <>	110.613	2970.82	1.15549	32.7567	62.7055	0.0677158	63.0712	0.0160875	6.78157	0.107523	102.882	6.92161	66.5296	40.6375	-1105.59	2084.24	102.882	6.92161	NA
LEARY-5LQ196-98 <>	299.572	19801.2	1.35647	20.6855	7.66907	0.107595	7.96902	0.016142	2.16579	0.271776	103.227	2.21788	103.763	7.86061	116.069	181.096	103.227	2.21788	NA
LEARY-5LQ196-50 <>	48.1491	2683.14	1.55449	21.5894	36.2295	0.104086	36.6466	0.0162979	5.51366	0.150455	104.216	5.69991	100.541	35.0934	14.2626	896.822	104.216	5.69991	NA
LEARY-5LQ196-110 <>	46.7528	1743.2	2.03219	16.2764	28.4445	0.143602	29.3293	0.0169519	7.14992	0.243781	108.363	7.68313	136.247	37.4123	654.605	622.01	108.363	7.68313	NA
LEARY-5LQ196-58 <>	128.454	2895	0.75157	20.9533	16.0457	0.113957	16.7619	0.0173178	4.8472	0.289181	110.682	5.3192	109.579	17.4128	85.6921	382.676	110.682	5.3192	NA
LEARY-5LQ196-5 <>	45.2063	2644.07	1.78844	-4.11046	943.314	-0.586071	943.367	0.0174718	9.9919	0.0105917	111.658	11.0607	-895.629	#NUM!	NA	NA	111.658	11.0607	NA
LEARY-5LQ196-29 <>	115.521	4573.69	1.07511	19.8907	19.1719	0.12126	19.3492	0.0174931	2.61326	0.135058	111.793	2.89625	116.214	21.2504	207.696	448.155	111.793	2.89625	NA
LEARY-5LQ196-35 <>	29.676	1566.6	1.18218	9.44444	22.2053	0.261749	23.5177	0.0179292	7.7463	0.329382	114.555	8.79541	236.076	49.5772	1729.67	412.826	114.555	8.79541	NA
LEARY-5LQ196-107 <>	58.1839	352.264	1.14949	14.5349	25.1015	0.170302	26.0675	0.0179528	7.03075	0.269713	114.704	7.99327	159.681	38.5354	892.722	526.207	114.704	7.99327	NA
LEARY-5LQ196-75 <>	61.9194	4408	0.517009	20.1396	57.8688	0.127834	58.2165	0.0186721	6.35341	0.109134	119.258	7.50731	122.149	67.0977	178.782	1469.94	119.258	7.50731	NA
LEARY-5LQ196-14 <>	569.694	49906.7	0.880867	20.8183	5.03063	0.130005	5.77759	0.0196292	2.84137	0.491791	125.312	3.52619	124.102	6.74934	100.968	119.041	125.312	3.52619	NA
LEARY-5LQ196-38 <>	37.1097	2000.92	2.42223	24.2063	62.6005	0.112027	63.3828	0.0196674	9.92707	0.156621	125.554	12.3432	107.818	64.9229	-268.312	1754.58	125.554	12.3432	NA
LEARY-5LQ196-92 <>	76.3266	5615.64	1.07702	23.8216	21.1494	0.116394	22.0961	0.0201095	6.39844	0.289574	128.348	8.13106	111.798	23.3957	-227.787	537.788	128.348	8.13106	NA
LEARY-5LQ196-56 <>	141.464	1927.06	0.752882	19.9216	8.11753	0.145963	8.5021	0.0210894	2.52812	0.297352	134.537	3.36602	138.341	10.9962	204.091	188.635	134.537	3.36602	NA
LEARY-5LQ196-9 <>	164.886	17960.1	1.0288	20.7992	10.5783	0.144503	10.7723	0.0217983	2.03504	0.188914	139.011	2.79866	137.047	13.811	103.125	250.658	139.011	2.79866	NA
LEARY-5LQ196-73 <>	88.8856	11396.2	1.2748	22.2706	18.7423	0.135809	19.2086	0.021936	4.20678	0.219004	139.88	5.82107	129.304	23.3252	-60.935	460.443	139.88	5.82107	NA
LEARY-5LQ196-102 <>	196.694	12282	1.08546	15.8098	9.8409	0.193056	10.1818	0.0221365	2.61265	0.2566	141.144	3.64753	179.234	16.7308	716.698	209.461	141.144	3.64753	NA
LEARY-5LQ196-39 <>	771.45	57002.3	1.35185	20.4524	2.61287	0.157233	3.40625	0.0233232	2.18529	0.641551	148.624	3.21071	148.278	4.6993	142.726	61.3503	148.624	3.21071	NA
LEARY-5LQ196-104 <>	1217.42	97243.4	2.17615	20.1867	1.36476	0.161718	4.84058	0.0236768	4.6442	0.959432	150.851	6.92451	152.206	6.84211	173.324	31.8368	150.851	6.92451	NA
LEARY-5LQ196-76 <>	194.854	14945.6	1.12869	17.4068	7.14103	0.189984	7.5798	0.0239847	2.54149	0.335298	152.79	3.83749	176.615	12.2881	508.798	157.195	152.79	3.83749	NA
LEARY-5LQ196-94 <>	1436.41	132747	2.44261	20.4681	1.3998	0.162391	1.7375	0.0241066	1.02932	0.592411	153.558	1.56192	152.794	2.46471	140.978	32.8513	153.558	1.56192	NA
LEARY-5LQ196-74 <>	117.381	4833.44	0.894909	20.3909	14.7605	0.163459	15.0392	0.0241737	2.88194	0.191628	153.98	4.38504	153.726	21.4574	149.81	347.552	153.98	4.38504	NA
LEARY-5LQ196-57 <>	65.4773	7109.26	1.15019	21.1917	30.7049	0.158034	31.7158	0.0242893	7.94369	0.250465	154.707	12.1432	148.981	43.975	58.7882	747.3	154.707	12.1432	NA
LEARY-5LQ196-108 <>	66.0889	2999.84	1.16549	23.7325	19.0907	0.141389	19.4814	0.0243364	3.88211	0.199272	155.004	5.94566	134.28	24.5085	-218.36	483.702	155.004	5.94566	NA
LEARY-5LQ196-70 <>	71.5449	10628	1.00321	16.9169	14.5672	0.205568	15.3567	0.0252218	4.86061	0.316514	160.573	7.70844	189.827	26.5944	571.224	318.451	160.573	7.70844	NA
LEARY-5LQ196-109 <>	39.8252	2188.27	1.9254	16.0603	14.3004	0.24951	15.1542	0.0290629	5.0147	0.330912	184.68	9.12977	226.178	30.7356	683.261	306.806	184.68	9.12977	NA
LEARY-5LQ196-17 <>	143.757	8446.84	1.50053	20.2634	10.7304	0.201964	11.5881	0.0296815	4.37527	0.377565	188.555	8.13029	186.787	19.7733	164.47	251.412	188.555	8.13029	NA
LEARY-5LQ196-82 <>	186.336	17911.6	2.33781	19.7083	7.16812	0.210703	9.50714	0.0301174	6.24529	0.656906	191.283	11.7707	194.142	16.8016	229.014	165.755	191.283	11.7707	NA
LEARY-5LQ196-3 <>	273.11	25068.1	1.55136	18.2802	3.85333	0.248527	4.93365	0.03295	3.08104	0.624494	208.985	6.33565	225.379	9.97215	400.119	86.3555	208.985	6.33565	NA
LEARY-5LQ196-42 <>	166.273	19553.8	1.54094	21.8296	6.8203	0.213843	7.56021	0.0338563	3.26193	0.431461	214.639	6.8861	196.773	13.5245	-12.3825	164.938	214.639	6.8861	NA
LEARY-5LQ196-2 <>	177.03	4730.81	1.24116	18.1863	11.0046	0.258738	12.9751	0.0341273	6.87391	0.529779	216.328	14.6235	233.649	27.0873	411.656	246.729	216.328	14.6235	NA
LEARY-5LQ196-64 <>	184.277	13320.2	1.56332	19.5772	2.89264	0.241804	5.63596	0.034333	4.83701	0.858241	217.61	10.3502	219.896	11.1436	244.413	66.6566	217.61	10.3502	NA
LEARY-5LQ196-41 <>	268.26	10330.6	1.51402	18.8911	3.07638	0.267968	3.27965	0.0367146	1.13664	0.346573	232.436	2.59489	241.068	7.03782	326.022	69.838	232.436	2.59489	NA
LEARY-5LQ196-84 <>	128.528	66558.1	0.540594	20.2785	7.94403	0.252005	8.33429	0.0370633	2.52048	0.302423	234.604	5.80685	228.204	17.035	162.734	185.995	234.604	5.80685	NA
LEARY-5LQ196-77 <>	21.7538	1601.98	1.34413	42.2978	76.0368	0.121958	76.3623	0.0374135	7.04335	0.0922359	236.781	16.3748	116.846	84.4782	NA	NA	236.781	16.3748	NA
LEARY-5LQ196-103 <>	26.6961	4409.5	0.715373	25.1512	36.217	0.206844	36.6437	0.0377312	5.57616	0.152172	238.754	13.0698	190.901	63.8548	-366.527	964.81	238.754	13.0698	NA
LEARY-5LQ196-87 <>	214.463	45247	1.50099	19.1376	2.33372	0.321009	3.29753	0.0445558	2.32968	0.706495	281.01	6.40602	282.678	8.13652	296.491	53.2506	281.01	6.40602	NA
LEARY-5LQ196-31 <>	265.358	58274.7	4.41884	18.7908	3.23584	0.41767	3.37763	0.0569217	0.968339	0.286692	356.877	3.36187	354.384	10.1045	338.06	73.301	356.877	3.36187	NA
LEARY-5LQ196-21 <>	86.7459	11677.8	0.774508	19.1378	3.40489	0.457306	5.26824	0.0634741	4.02009	0.76308	396.719	15.4676	382.382	16.7877	296.482	77.7217	396.719	15.4676	NA
LEARY-5LQ196-36 <>	246.551	52156.7	2.45548	17.9464	2.05203	0.543286	4.34207	0.0707138	3.82658	0.881281	440.455	16.2915	440.589	15.5218	441.269	45.6549	440.455	16.2915	99.8154
LEARY-5LQ196-79 <>	62.6005	14828.3	0.323195	20.4656	7.20598	0.540171	7.62259	0.0801781	2.48549	0.326069	497.186	11.893	438.537	27.1518	141.229	169.345	497.186	11.893	352.043
LEARY-5LQ196-51 <>	81.5138	16571.6	0.7325	16.1858	4.11248	0.694141	6.26656	0.0814856	4.72835	0.754536	504.984	22.9662	535.286	26.0767	666.579	88.0819	504.984	22.9662	75.7576
LEARY-5LQ196-30 <>	44.5978	14251.5	0.301204	18.4708	10.2716	0.615159	10.4746	0.0824086	2.05228	0.195929	510.483	10.0725	486.809	40.5294	376.831	231.599	510.483	10.0725	135.468
LEARY-5LQ196-33 <>	202.14	52485.8	0.691553	17.3197	1.84595	0.66409	5.00873	0.0834191	4.65616	0.929609	516.499	23.1109	517.113	20.2986	519.805	40.5369	516.499	23.1109	99.364
LEARY-5LQ196-12 <>	305.617	169193	3.67266	17.1139	1.07352	0.707236	2.51924	0.0877836	2.27906	0.904662	542.416	11.8562	543.104	10.5971	545.972	23.4773	542.416	11.8562	99.3487
LEARY-5LQ196-67 <>	48.3552	17562.9	0.885928	16.7024	5.55088	0.764556	6.32237	0.0926162	3.02656	0.478707	570.991	16.5382	576.635	27.8223	598.942	120.286	570.991	16.5382	95.3333
LEARY-5LQ196-85 <>	107.136	50304.1	1.37009	16.7695	3.08108	0.77894	3.64694	0.0947378	1.95117	0.535017	583.496	10.885	584.879	16.2158	590.262	66.8373	583.496	10.885	98.8537
LEARY-5LQ196-106 <>	409.561	127596	2.41959	16.817	0.811112	0.784105	1.23248	0.0956358	0.927957	0.752919	588.782	5.22156	587.822	5.50007	584.097	17.5875	588.782	5.22156	100.802
LEARY-5LQ196-91 <>	340.071	18724.8	0.597794	14.806	1.08448	1.04589	6.07877	0.112311	5.98125	0.983957	686.158	38.9326	726.845	31.5638	854.45	22.5076	686.158	38.9326	80.304
LEARY-5LQ196-86 <>	187.716	27321.8	0.99306	14.8914	1.58539	1.16343	8.00327	0.125653	7.84467	0.980183	763.019	56.4511	783.565	43.7283	842.541	32.9966	763.019	56.4511	90.5617
LEARY-5LQ196-40 <>	55.296	34682.3	0.822052	15.2359	5.64207	1.15465	6.09027	0.12759	2.29315	0.376526	774.104	16.727	779.438	33.1509	794.722	118.424	774.104	16.727	97.4056
LEARY-5LQ196-59 <>	134.999	73957.7	1.21549	15.3912	1.83809	1.16772	3.28758	0.13035	2.72573	0.829099	789.86	20.2628	785.578	17.984	773.419	38.6799	789.86	20.2628	102.126
LEARY-5LQ196-101 <>	247.443	220988	1.24177	15.3401	0.884164	1.19502	2.49087	0.132954	2.32867	0.934881	804.696	17.6164	798.284	13.7703	780.406	18.584	804.696	17.6164	103.113
LEARY-5LQ196-83 <>	142.173	69550.1	1.75393	14.4631	1.1925	1.45326	2.53802	0.152441	2.24042	0.882744	914.635	19.1044	911.222	15.2671	902.943	24.5808	902.943	24.5808	101.295
LEARY-5LQ196-6 <>	217.786	69819.2	3.6619	13.5815	1.12378	1.59452	2.79083	0.157064	2.55458	0.915346	940.439	22.3541	968.067	17.4172	1031.31	22.7325	1031.31	22.7325	91.1885
LEARY-5LQ196-11 <>	351.348	340164	2.18936	13.2832	0.395097	1.89368	1.47981	0.182436	1.42609	0.963699	1080.27	14.1839	1078.87	9.83341	1076.08	7.91384	1076.08	7.91384	100.389
LEARY-5LQ196-23 <>	292.755	314256	9.49945	13.1953	0.515983	1.93335	3.28912	0.185024	3.2484	0.987618	1094.36	32.6958	1092.7	22.0153	1089.37	10.3394	1089.37	10.3394	100.459
LEARY-5LQ196-25 <>	122.164	67829.6	1.24533	12.8614	1.35531	2.05422	5.59085	0.191618	5.42409	0.970172	1130.13	56.2282	1133.7	38.1996	1140.55	26.9517	1140.55	26.9517	99.0862
LEARY-5LQ196-37 <>	117.5	46551.4	1.3857	12.6297	1.16811	2.18003	1.97326	0.199689	1.59037	0.80596	1173.65	17.0648	1174.69	13.7363	1176.62	23.1251	1176.62	23.1251	99.7479
LEARY-5LQ196-13 <>	69.7638	37465.1	1.10172	11.9924	1.30722	2.4296	3.74125	0.21132	3.50545	0.936971	1235.85	39.4229	1251.4	26.9178	1278.24	25.4832	1278.24	25.4832	96.6831
LEARY-5LQ196-71 <>	240.554	20089.4	1.03053	10.334	0.36892	3.11358	5.74822	0.233362	5.73637	0.997938	1352.09	69.9699	1436.05	44.2056	1562.7	6.91785	1562.7	6.91785	86.5227
LEARY-5LQ196-10 <>	106.427	63094.7	0.528162	10.0785	0.73307	3.19401	2.68063	0.233471	2.57844	0.961881	1352.66	31.4617	1455.71	20.7316	1609.5	13.6612	1609.5	13.6612	84.0424
LEARY-5LQ196-93 <>	82.4544	131345	0.957914	10.0119	1.03636	4.02453	3.16607	0.292234	2.99165	0.944909	1652.68	43.6139	1639.17	25.7551	1621.85	19.2834	1621.85	19.2834	101.901
LEARY-5LQ196-20 <>	142.369	116053	1.20538	9.99266	0.376713	3.862	3.46201	0.279893	3.44145	0.994062	1590.82	48.5161	1605.78	27.9296	1625.43	7.00499	1625.43	7.00499	97.8708
LEARY-5LQ196-19 <>	72.5223	113617	0.863223	9.92	0.960545	3.98131	2.92134	0.286442	2.75891	0.944398	1623.72	39.6011	1630.39	23.7123	1638.99	17.8347	1638.99	17.8347	99.0683
LEARY-5LQ196-18 <>	118.253	89384.2	1.61142	9.27674	0.843307	4.72275	4.49697	0.317753	4.41719	0.982259	1778.74	68.6651	1771.28	37.6999	1762.48	15.4155	1762.48	15.4155	100.923
LEARY-5LQ196-22 <>	96.1279	51808.1	1.53755	8.61375	0.462884	5.42183	3.08205	0.338717	3.04709	0.988658	1880.49	49.7005	1888.31	26.4274	1896.9	8.32207	1896.9	8.32207	99.1351
LEARY-5LQ196-27 <>	176.953	106475	1.67929	8.25028	0.450792	5.30566	2.33878	0.317473	2.29492	0.981249	1777.38	35.6497	1869.78	19.9841	1974.07	8.03302	1974.07	8.03302	90.0363
LEARY-5LQ196-32 <>	150.489	107538	1.83487	6.8141	0.525523	8.35221	3.26719	0.41277	3.22465	0.986979	2227.58	60.7367	2270	29.6357	2308.43	9.02052	2308.43	9.02052	96.4973
LEARY-5LQ196-97 <>	178.109	255339	1.34071	6.1253	0.212728	10.1822	1.41856	0.452342	1.40252	0.988692	2405.66	28.1597	2451.46	13.1164	2489.66	3.58502	2489.66	3.58502	96.6258
LEARY-5LQ196-8 <>	312.404	178714	3.12109	6.08017	0.185299	9.58972	3.17902	0.422883	3.17361	0.9983	2273.56	60.8046	2396.19	29.2391	2502.12	3.11884	2502.12	3.11884	90.8652
LEARY-5LQ196-99 <>	74.6231	51077.3	1.5863	5.06967	0.537729	13.6628	5.73067	0.502365	5.70539	0.995588	2623.95	122.999	2726.63	54.2715	2803.58	8.79559	2803.58	8.79559	93.5931
LEARY-5LQ196-4 <>	79.883	125720	1.24708	5.05245	0.205601	14.8663	3.3836	0.54476	3.37734	0.998152	2803.34	76.7818	2806.72	32.2019	2809.14	3.36126	2809.14	3.36126	99.7937
LEARY-5LQ196-81 <>	88.0375	31264	1.26266	5.03494	0.469668	13.7833	2.09371	0.503323	2.04035	0.974515	2628.06	44.0377	2734.93	19.8237	2814.81	7.67437	2814.81	7.67437	93.3654
LEARY-5LQ196-7 <>	80.6016	135329	1.26741	3.43301	0.223988	26.1837	2.98593	0.651937	2.97752	0.997182	3235.77	75.7539	3353.42	29.2114	3424.5	3.48194	3424.5	3.48194	94.4888
LEARY-5LQ196-62 <>	340.546	326267	0.778605	3.15019	0.156496	32.307	4.20116	0.73813	4.19824	0.999306	3563.64	114.943	3559.7	41.4	3557.47	2.40944	3557.47	2.40944	100.173
Sample:	7LQ-268		N29.16355	E88.13490
30	3062.98	8674.08	10.7331	20.7065	2.78954	0.0142049	5.74621	0.00213326	5.02368	0.874261	13.7372	0.689379	14.3219	0.817192	113.723	65.8225	13.7372	0.689379	NA
259	235.314	1672.74	1.26466	16.6803	5.20735	0.110208	7.63767	0.0133326	5.58727	0.73154	85.3793	4.73892	106.155	7.69851	601.788	112.779	85.3793	4.73892	NA
94	203.703	1511.08	0.786664	18.2816	4.71392	0.108513	7.7494	0.0143878	6.15078	0.793711	92.0891	5.62393	104.605	7.7028	399.957	105.665	92.0891	5.62393	NA
139	148.76	2857.01	1.20874	17.0645	4.43844	0.1246	6.61115	0.0154209	4.89976	0.741135	98.6506	4.79684	119.234	7.43763	552.339	96.9013	98.6506	4.79684	NA
207	157.026	2379.03	1.07378	17.5218	3.91899	0.128624	8.69072	0.0163456	7.75694	0.892555	104.519	8.04209	122.861	10.0571	494.287	86.4265	104.519	8.04209	NA
233	262.555	3315.18	0.79097	17.3017	3.49441	0.131625	5.76141	0.0165168	4.58072	0.795069	105.605	4.79804	125.557	6.80458	522.085	76.6923	105.605	4.79804	NA
281	202.957	3284.69	1.3782	17.7201	4.33458	0.137238	8.82871	0.0176376	7.69139	0.871179	112.708	8.59348	130.581	10.8185	469.449	96.0167	112.708	8.59348	NA
79	194.839	14547.5	1.1982	16.6563	3.35871	0.168646	5.21811	0.0203729	3.99347	0.765309	130.012	5.13999	158.243	7.64618	604.906	72.6574	130.012	5.13999	NA
299	557.137	8183.2	0.341125	20.6539	2.06216	0.1505	2.63408	0.0225443	1.63886	0.622177	143.716	2.32925	142.353	3.49873	119.669	48.6071	143.716	2.32925	NA
174	390.313	15249.1	0.277413	20.6993	2.31008	0.151888	2.88102	0.0228023	1.72158	0.597559	145.342	2.47419	143.578	3.85738	114.508	54.4878	145.342	2.47419	NA
187	933.941	13243.1	1.568	20.557	1.58105	0.159539	2.23346	0.0237863	1.57754	0.706321	151.541	2.36274	150.3	3.12026	130.785	37.1675	151.541	2.36274	NA
108	428.92	19477.1	1.16459	19.1551	2.33881	0.176903	3.00162	0.0245764	1.88141	0.626799	156.514	2.90922	165.392	4.58124	294.428	53.3831	156.514	2.90922	NA
14	544.747	10155.9	1.74133	20.3204	1.79554	0.169251	2.38828	0.0249438	1.57478	0.659378	158.826	2.47059	158.769	3.51027	157.907	42.001	158.826	2.47059	NA
179	250.124	26489.3	0.169263	19.3415	3.11535	0.178054	7.48087	0.024977	6.80133	0.909162	159.034	10.6841	166.384	11.4812	272.242	71.4106	159.034	10.6841	NA
24	112.34	1699.14	1.0542	18.6318	4.57066	0.208496	6.80513	0.0281742	5.04171	0.740869	179.111	8.90596	192.29	11.9217	357.28	103.22	179.111	8.90596	NA
268	580.873	12888.8	4.20181	18.4626	1.82339	0.226634	2.35103	0.0303471	1.48411	0.631259	192.72	2.81784	207.416	4.41063	377.837	40.9979	192.72	2.81784	NA
49	446.491	10281.9	2.01115	20.1255	2.00952	0.23283	2.53972	0.0339846	1.55306	0.61151	215.439	3.29061	212.532	4.87028	180.416	46.8305	215.439	3.29061	NA
285	44.6579	611.483	1.3796	17.1619	7.83073	0.285645	12.2017	0.0355542	9.35746	0.766896	225.217	20.7107	255.126	27.5336	539.895	171.509	225.217	20.7107	NA
38	163.119	1440.17	0.853512	20.8384	4.09158	0.258408	4.83711	0.0390543	2.58004	0.533385	246.969	6.25138	233.383	10.0859	98.7021	96.8605	246.969	6.25138	NA
172	191.323	7044.07	0.947572	19.6347	2.50487	0.28054	3.23087	0.03995	2.04062	0.631602	252.523	5.05343	251.086	7.18717	237.678	57.7987	252.523	5.05343	NA
91	886.506	30933.5	2.74797	19.2667	1.28293	0.289062	2.74275	0.0403923	2.42421	0.883859	255.264	6.06721	257.821	6.2451	281.157	29.3585	255.264	6.06721	NA
238	114.049	3936.07	1.87787	18.602	3.5634	0.3258	4.81964	0.0439551	3.24516	0.673321	277.302	8.80811	286.354	12.0265	360.887	80.3935	277.302	8.80811	NA
230	155.191	390.327	0.49048	37.2293	4.81745	0.167324	5.55112	0.0451796	2.7581	0.496855	284.859	7.68562	157.094	8.07954	-1512.46	160.685	284.859	7.68562	NA
95	309.769	16104	2.3499	18.9416	1.65645	0.430453	2.54813	0.0591347	1.93627	0.759878	370.361	6.96908	363.498	7.78597	319.963	37.6242	370.361	6.96908	NA
158	219.132	13259.9	1.06776	19.1939	1.89423	0.433365	2.585	0.0603274	1.75901	0.68047	377.616	6.45152	365.563	7.93589	289.821	43.2755	377.616	6.45152	NA
138	299.501	27008.5	1.56429	18.5944	1.24204	0.490893	2.04074	0.0662016	1.61925	0.793462	413.231	6.4813	405.519	6.82284	361.807	28.0067	413.231	6.4813	114.213
221	935.981	1178.87	2.85989	17.076	0.846795	0.574129	1.63139	0.0711041	1.39441	0.854736	442.804	5.96722	460.681	6.04175	550.82	18.4868	442.804	5.96722	80.39
64	253.7	2382.53	0.90459	15.981	4.11764	0.632863	4.38395	0.0733519	1.50467	0.343224	456.319	6.62873	497.878	17.2543	693.82	87.8087	456.319	6.62873	65.769
22	199.956	13439.6	0.823487	18.0878	1.82342	0.568284	2.72385	0.0745506	2.02349	0.742878	463.513	9.04991	456.904	10.0223	423.777	40.6999	463.513	9.04991	109.377
32	52.9175	2657.16	0.397296	17.5867	4.33279	0.590502	5.84822	0.0753191	3.92793	0.671646	468.122	17.7358	471.188	22.05	486.147	95.6809	468.122	17.7358	96.2922
200	106.824	7519.02	0.850212	17.7786	3.04465	0.598861	4.56469	0.0772187	3.40096	0.745058	479.5	15.7159	476.51	17.362	462.125	67.5201	479.5	15.7159	103.76
126	273.516	12648.1	0.573947	17.4726	1.17433	0.612753	1.72267	0.0776499	1.26037	0.731636	482.08	5.85434	485.295	6.64592	500.528	25.877	482.08	5.85434	96.3143
135	187.458	20884.8	0.918117	17.8799	1.93751	0.615963	2.83561	0.0798766	2.07045	0.730158	495.386	9.87252	487.314	10.9753	449.513	43.048	495.386	9.87252	110.205
31	81.8094	7409.23	0.703037	17.13	2.89162	0.644809	4.22214	0.08011	3.07652	0.728664	496.779	14.7095	505.279	16.8081	543.929	63.2136	496.779	14.7095	91.3317
128	78.5384	1564.26	1.80503	19.0749	4.22098	0.580664	6.67314	0.0803317	5.16857	0.774534	498.102	24.7754	464.888	24.8962	303.984	96.2324	498.102	24.7754	163.858
217	220.143	12778.5	0.804997	17.6876	1.67994	0.629596	2.13041	0.0807662	1.31014	0.61497	500.694	6.31152	495.844	8.35768	473.508	37.1779	500.694	6.31152	105.741
129	972.489	1943.71	0.980947	15.2952	0.525277	0.728955	1.68589	0.0808637	1.60197	0.950222	501.276	7.726	555.94	7.21744	786.573	11.0301	501.276	7.726	63.7291
283	147.542	7177.69	0.326544	17.8361	2.33795	0.625954	4.23879	0.0809731	3.53573	0.834135	501.929	17.0735	493.572	16.5709	454.964	51.892	501.929	17.0735	110.323
239	79.599	6476.57	0.39662	17.5889	2.77232	0.636825	4.52077	0.0812376	3.57094	0.789896	503.506	17.2957	500.339	17.861	485.875	61.2081	503.506	17.2957	103.629
61	146.061	5552.22	0.807472	18.188	2.18471	0.623199	2.84914	0.0822073	1.82883	0.641889	509.284	8.95553	491.85	11.1075	411.441	48.8578	509.284	8.95553	123.781
245	167.257	10664.3	0.587053	18.1831	2.17021	0.624962	2.78583	0.0824177	1.74671	0.627001	510.537	8.57365	492.953	10.8796	412.045	48.5284	510.537	8.57365	123.903
132	96.6945	17519.8	1.02666	18.5317	2.4592	0.61381	4.87218	0.0824988	4.20601	0.86327	511.021	20.6638	485.96	18.8185	369.427	55.3934	511.021	20.6638	138.328
134	159.2	24501.7	0.776537	17.5037	1.85379	0.650713	2.93078	0.082607	2.27001	0.774541	511.665	11.1659	508.917	11.7314	496.611	40.8603	511.665	11.1659	103.031
255	77.7311	1931.07	0.346119	16.8478	3.61693	0.679025	7.28191	0.082971	6.32012	0.867921	513.832	31.2145	526.185	29.9109	580.165	78.5863	513.832	31.2145	88.5666
148	134.074	29047.7	1.58469	17.9005	2.38255	0.639517	2.76699	0.0830261	1.40701	0.5085	514.16	6.95333	502.007	10.9595	446.966	52.9761	514.16	6.95333	115.033
127	69.9618	8025.57	0.428729	16.416	3.35518	0.698645	5.15489	0.0831808	3.91352	0.759186	515.081	19.3735	537.981	21.5312	636.292	72.2223	515.081	19.3735	80.9503
178	259.739	30376.1	0.731889	17.4095	1.30942	0.664112	2.53541	0.0838547	2.17112	0.856317	519.09	10.8282	517.126	10.2743	508.479	28.804	519.09	10.8282	102.087
289	495.394	15009.5	2.10525	17.4553	1.00159	0.663589	1.46744	0.0840088	1.07248	0.730849	520.007	5.35796	516.807	5.9436	502.707	22.0463	520.007	5.35796	103.441
73	160.125	12314.7	1.09025	18.0695	2.29498	0.64646	2.64535	0.08472	1.31564	0.497341	524.235	6.62405	506.298	10.5467	426.04	51.1943	524.235	6.62405	123.048
113	68.1791	2758.65	0.363886	15.5629	3.90385	0.754158	5.601	0.085124	4.01636	0.717079	526.635	20.3107	570.634	24.4553	750.025	82.4992	526.635	20.3107	70.2157
266	204.944	9759.35	0.677108	17.7812	1.78327	0.660506	3.02194	0.08518	2.43969	0.807325	526.968	12.3449	514.924	12.206	461.797	39.5468	526.968	12.3449	114.112
202	35.1875	4701.15	0.496025	16.2037	3.82698	0.725505	7.7699	0.0852618	6.76207	0.87029	527.454	34.2469	553.912	33.1837	664.238	82.0042	527.454	34.2469	79.4073
26	52.6678	3298.85	0.738764	17.1685	3.51424	0.685731	5.13822	0.0853858	3.74851	0.729536	528.19	19.0099	530.232	21.2261	539.009	76.8745	528.19	19.0099	97.9928
37	42.3903	2391.57	0.597277	16.7841	3.95301	0.701573	7.84371	0.0854026	6.77477	0.86372	528.29	34.3635	539.73	32.8492	588.348	85.799	528.29	34.3635	89.792
175	270.466	11324.6	1.53217	17.0336	1.61672	0.692224	2.41235	0.0855167	1.79044	0.742195	528.967	9.09267	534.136	10.0201	556.291	35.2853	528.967	9.09267	95.0882
66	128.413	11098.3	1.17247	17.2377	2.27001	0.684527	2.97391	0.085579	1.92125	0.646034	529.338	9.76355	529.507	12.2713	530.256	49.7574	529.338	9.76355	99.8268
103	133.383	918.231	0.313164	15.7451	5.09328	0.750038	6.05375	0.0856499	3.27206	0.540501	529.758	16.6409	568.247	26.3504	725.399	108.077	529.758	16.6409	73.03
84	118.622	11616.3	0.83897	18.3886	2.46878	0.642851	3.44737	0.0857347	2.40615	0.697965	530.262	12.2482	504.07	13.698	386.865	55.4475	530.262	12.2482	137.066
205	71.711	10847.4	0.654142	16.2822	3.07551	0.728801	4.2961	0.0860637	2.99961	0.698218	532.215	15.3232	555.849	18.3914	653.873	65.9956	532.215	15.3232	81.3943
16	186.177	13377	0.290438	17.6179	1.93467	0.674133	2.83949	0.0861389	2.0784	0.731962	532.661	10.6258	523.222	11.6103	482.255	42.7373	532.661	10.6258	110.452
241	329.673	5512.19	0.613689	16.8828	1.76394	0.70391	2.44602	0.0861906	1.69456	0.692783	532.968	8.66821	541.123	10.2606	575.624	38.347	532.968	8.66821	92.5898
45	102.632	6082.82	0.932832	17.7922	2.59591	0.670583	3.64028	0.0865329	2.55204	0.701056	535	13.1022	521.067	14.8382	460.429	57.5648	535	13.1022	116.196
2	319.392	17289.7	2.46908	17.0984	1.20827	0.699009	1.94601	0.0866836	1.52547	0.783893	535.893	7.8443	538.199	8.12965	548.001	26.4031	535.893	7.8443	97.7907
226	429.439	24610.8	2.69128	17.2427	1.0761	0.694533	2.664	0.0868555	2.43699	0.914785	536.913	12.5544	535.52	11.0873	529.613	23.578	536.913	12.5544	101.378
177	164.545	19920.3	1.02205	17.5268	1.75383	0.683908	2.35861	0.0869361	1.57707	0.668642	537.391	8.13138	529.134	9.727	493.675	38.6661	537.391	8.13138	108.855
208	140.282	2579.63	1.19	18.4342	2.77789	0.652022	3.23672	0.0871737	1.66121	0.513241	538.8	8.58679	509.722	12.9719	381.295	62.4358	538.8	8.58679	141.308
104	80.4014	8987.87	0.875852	17.8471	3.1519	0.681933	5.93223	0.0882688	5.02562	0.847172	545.29	26.2773	527.942	24.4267	453.601	69.9804	545.29	26.2773	120.214
12	70.3197	5525.03	0.379329	18.4066	3.34651	0.661938	4.75883	0.088367	3.38339	0.710971	545.872	17.7087	515.799	19.248	384.661	75.2027	545.872	17.7087	141.91
122	397.322	51409.9	1.62963	17.2413	0.800678	0.70676	1.5425	0.0883776	1.31842	0.854727	545.935	6.90135	542.821	6.48577	529.787	17.5227	545.935	6.90135	103.048
237	290.846	15182.1	4.07115	17.1406	1.12467	0.718336	1.75634	0.0893004	1.34902	0.768085	551.398	7.12922	549.684	7.45532	542.58	24.6088	551.398	7.12922	101.625
86	274.415	22442.9	13.5061	17.3475	0.863957	0.710898	1.87609	0.0894423	1.66533	0.887656	552.238	8.81366	545.279	7.91547	516.282	18.9805	552.238	8.81366	106.964
166	140.548	29383.3	1.10716	17.6369	2.08775	0.701934	3.06279	0.0897878	2.24098	0.731678	554.282	11.9023	539.945	12.827	479.836	46.1594	554.282	11.9023	115.515
56	19.8649	2070.66	3.2743	12.7399	5.7493	0.973129	10.4989	0.0899153	8.7848	0.836735	555.036	46.7196	690.075	52.6233	1159.38	114.084	555.036	46.7196	47.8736
273	377.53	5460.01	2.00901	17.1298	1.19487	0.725463	2.7469	0.0901291	2.47341	0.900436	556.301	13.1826	553.887	11.7274	543.99	26.137	556.301	13.1826	102.263
185	350.876	40176.1	226.779	17.4752	1.12703	0.711535	1.96783	0.0901817	1.61313	0.819747	556.611	8.60213	545.657	8.30689	500.189	24.8083	556.611	8.60213	111.28
23	194.014	7641.85	2.67017	17.5463	1.6778	0.714864	2.50456	0.0909722	1.85952	0.742454	561.284	9.99572	547.631	10.6016	491.2	37.0181	561.284	9.99572	114.268
167	382.608	3950.46	2.8406	16.4492	1.14043	0.766025	3.01434	0.0913873	2.79028	0.925668	563.736	15.0617	577.48	13.2768	631.951	24.5692	563.736	15.0617	89.2057
29	172.139	5275.02	0.482447	17.7982	1.81822	0.711042	2.78377	0.0917845	2.10795	0.757228	566.082	11.4238	545.365	11.7467	459.688	40.3418	566.082	11.4238	123.145
47	226.24	36710.9	34.2473	17.0321	1.1972	0.743501	1.61152	0.0918435	1.07875	0.6694	566.43	5.84963	564.446	6.97802	556.479	26.0968	566.43	5.84963	101.788
254	53.1305	1621.54	0.479619	15.7683	4.72628	0.807121	7.29064	0.0923043	5.55118	0.761413	569.151	30.2402	600.837	33.075	722.271	100.352	569.151	30.2402	78.8001
288	118.966	10113	0.438896	17.9669	2.75528	0.709134	4.15667	0.0924063	3.1123	0.748747	569.753	16.9714	544.232	17.5134	438.721	61.351	569.753	16.9714	129.867
72	174.114	20660.3	2.35516	17.6088	1.53791	0.731657	2.19641	0.0934405	1.56814	0.713954	575.853	8.63859	557.525	9.42327	483.405	33.9655	575.853	8.63859	119.124
298	132.907	10802.9	1.31068	17.442	2.25968	0.740707	3.18762	0.0937001	2.24828	0.705318	577.383	12.4169	562.818	13.7735	504.386	49.747	577.383	12.4169	114.472
275	51.0828	1512.56	0.479891	17.8865	4.56536	0.722657	10.2331	0.093747	9.15831	0.894966	577.659	50.6038	552.234	43.6153	448.695	101.459	577.659	50.6038	128.742
36	706.99	4037.45	1.75203	17.0945	0.698397	0.757215	2.05232	0.0938801	1.92984	0.940318	578.444	10.6769	572.402	8.9801	548.5	15.2449	578.444	10.6769	105.459
28	300.173	13842.5	4.19869	16.7972	0.876312	0.78336	1.93627	0.0954327	1.72662	0.891725	587.587	9.69676	587.398	8.63631	586.663	18.9955	587.587	9.69676	100.158
54	85.3176	4429.14	112.075	18.1864	2.65319	0.723596	3.77448	0.0954426	2.68464	0.711261	587.645	15.0785	552.787	16.091	411.635	59.3197	587.645	15.0785	142.759
228	85.6721	7409.01	2.15672	16.3449	2.71557	0.813133	3.74608	0.0963927	2.58046	0.688843	593.234	14.625	604.21	17.06	645.624	58.3482	593.234	14.625	91.8853
141	164.943	22496.2	1.27184	16.8693	1.56752	0.789579	2.36158	0.096603	1.76633	0.747945	594.47	10.0307	590.933	10.5802	577.392	34.0656	594.47	10.0307	102.958
291	497.757	28557.1	1.95963	17.3226	0.966218	0.775221	3.67843	0.0973951	3.54926	0.964885	599.125	20.3063	582.753	16.3118	519.436	21.2104	599.125	20.3063	115.341
143	264.807	23019.1	0.620532	16.6508	0.846966	0.818609	2.28139	0.0988575	2.11834	0.928533	607.71	12.2852	607.272	10.4275	605.616	18.3205	607.71	12.2852	100.346
117	361.907	5031.3	1.83645	16.3043	1.08917	0.847555	2.94375	0.100223	2.73485	0.929034	615.718	16.0598	623.306	13.7129	650.946	23.3836	615.718	16.0598	94.5881
258	243.541	1486.92	2.50262	15.3915	2.65553	0.906428	5.14726	0.101184	4.40937	0.856643	621.346	26.1186	655.157	24.8546	773.371	55.9092	621.346	26.1186	80.3426
231	707.082	33573.5	18.7625	16.3603	0.489943	0.856187	1.12222	0.101592	1.00962	0.899664	623.732	6.00228	628.039	5.25605	643.603	10.5231	623.732	6.00228	96.9125
76	211.904	29708.9	3.00996	16.5442	1.15696	0.856446	1.75465	0.102765	1.31918	0.751819	630.593	7.92474	628.181	8.21955	619.486	24.9831	630.593	7.92474	101.793
162	573.869	34649.1	0.562694	16.5538	0.879512	0.865854	3.41822	0.103954	3.30314	0.966331	637.539	20.051	633.314	16.1077	618.24	18.9843	637.539	20.051	103.122
81	104.824	7914.84	2.25912	16.4308	1.90448	0.87611	2.52641	0.104404	1.66004	0.657074	640.164	10.1164	638.88	11.9799	634.361	40.9901	640.164	10.1164	100.915
48	256.955	8840.37	1.36291	15.874	1.03487	0.951458	1.4411	0.10954	1.0029	0.695926	670.077	6.38272	678.861	7.13446	708.099	22.0088	670.077	6.38272	94.6304
131	215.333	26384.1	1.52818	15.9144	1.02135	0.972929	2.01064	0.112298	1.73191	0.861374	686.077	11.2718	689.972	10.0681	702.711	21.7404	686.077	11.2718	97.633
39	513.653	8749.44	4.6128	15.3032	0.671831	1.0716	2.01871	0.118936	1.90364	0.942997	724.438	13.0441	739.525	10.6035	785.468	14.1098	724.438	13.0441	92.2301
184	320.664	5200.33	5.34955	14.9925	0.857077	1.12255	1.58022	0.122061	1.3276	0.840135	742.414	9.3099	764.193	8.48604	828.424	17.8774	742.414	9.3099	89.6176
70	296.168	24703.6	2.20893	15.4862	0.820699	1.09967	1.98506	0.123512	1.80746	0.910533	750.743	12.8091	753.193	10.5568	760.454	17.3057	750.743	12.8091	98.723
154	196.297	18886.1	1.04296	14.8338	1.39848	1.14921	2.99085	0.123638	2.64376	0.883948	751.466	18.7528	776.868	16.2398	850.553	29.0483	751.466	18.7528	88.3504
206	213.441	16253.7	1.90091	15.1366	1.06648	1.15973	1.79753	0.127316	1.44698	0.80498	772.536	10.5346	781.828	9.80115	808.421	22.3163	772.536	10.5346	95.5611
186	428.777	86319.8	2.27848	15.3099	0.875172	1.1595	1.43875	0.128749	1.14196	0.793717	780.722	8.3968	781.721	7.84406	784.552	18.3828	780.722	8.3968	99.5119
171	160.235	20531	0.900079	14.622	1.16083	1.24599	2.15031	0.132135	1.81006	0.841766	800.033	13.6186	821.591	12.1132	880.384	24.0161	800.033	13.6186	90.8732
83	140.692	10094.6	0.664114	14.8652	1.86892	1.25218	3.72761	0.135001	3.22525	0.865232	816.332	24.73	824.387	21.0468	846.194	38.8806	816.332	24.73	96.4709
125	56.3426	8231.27	0.463755	15.3114	3.08084	1.23706	4.85605	0.137373	3.75361	0.772977	829.792	29.226	817.547	27.2728	784.352	64.7491	829.792	29.226	105.793
232	305.39	5178.04	1.71594	14.3951	0.986094	1.34346	2.55042	0.140262	2.35208	0.922231	846.144	18.6512	864.731	14.8471	912.651	20.2891	846.144	18.6512	92.7128
19	399.367	15516.1	3.35948	14.2702	0.641082	1.36681	2.35157	0.141461	2.2625	0.962122	852.919	18.0752	874.795	13.7898	930.562	13.1598	852.919	18.0752	91.6564
279	158.552	22030.5	1.82597	14.6602	1.3546	1.33842	1.87646	0.142308	1.29853	0.692009	857.701	10.4284	862.542	10.9058	875.006	28.0458	857.701	10.4284	98.0222
114	165.417	19485.1	1.16738	14.6442	1.11822	1.3686	3.01987	0.145359	2.8052	0.928916	874.895	22.9501	875.564	17.7193	877.275	23.1414	874.895	22.9501	99.7288
9	230.306	16464.6	2.27217	14.3993	0.748239	1.4126	1.5602	0.147523	1.36908	0.877499	887.062	11.346	894.252	9.27591	912.048	15.3902	887.062	11.346	97.2604
271	399.862	32004	8.92228	14.8196	0.579449	1.39586	1.78178	0.15003	1.68493	0.945642	901.13	14.1699	887.184	10.541	852.57	12.0607	901.13	14.1699	105.696
27	343.489	20552.2	2.49167	14.409	0.565618	1.44476	1.46545	0.150983	1.35189	0.922512	906.473	11.432	907.698	8.79369	910.662	11.6657	910.662	11.6657	99.5401
3	176.626	13615.6	1.31232	14.3914	1.18668	1.47311	1.70364	0.153758	1.22237	0.717504	921.993	10.5013	919.405	10.3042	913.181	24.4145	913.181	24.4145	100.965
121	79.6436	11307.2	0.426371	14.3504	1.67407	1.42494	3.02605	0.148306	2.52081	0.833037	891.462	20.9876	899.434	18.0571	919.093	34.4184	919.093	34.4184	96.9936
87	591.208	47226.5	8.57368	14.3193	0.306725	1.4504	0.936045	0.150629	0.884365	0.944788	904.487	7.46316	910.04	5.62578	923.556	6.29562	923.556	6.29562	97.9352
257	154.343	10936.7	0.572522	14.2481	1.47994	1.40626	2.65176	0.145318	2.20036	0.829775	874.665	17.9973	891.581	15.737	933.751	30.3842	933.751	30.3842	93.6722
33	396.262	27032.1	10.4694	14.2217	0.649764	1.53954	1.30782	0.158797	1.13499	0.867849	950.086	10.0264	946.319	8.05052	937.543	13.3052	937.543	13.3052	101.338
224	319.422	26151.9	2.4425	14.2111	0.541563	1.48815	1.39563	0.153382	1.28628	0.921642	919.893	11.0269	925.562	8.47583	939.077	11.1017	939.077	11.1017	97.9571
65	187.803	27797	2.00838	14.1733	0.775397	1.47921	1.77505	0.152054	1.59674	0.899544	912.469	13.5856	921.905	10.7541	944.533	15.8842	944.533	15.8842	96.6052
269	128.87	37767.3	1.12138	14.1125	1.23489	1.60368	2.11771	0.164142	1.72039	0.812382	979.754	15.6372	971.647	13.245	953.342	25.2429	953.342	25.2429	102.77
196	388.248	47905.2	11.6151	14.1051	0.992835	1.57737	1.81261	0.161364	1.51652	0.83665	964.352	13.5833	961.332	11.2644	954.41	20.3039	954.41	20.3039	101.042
119	34.861	6247.08	0.347616	13.9972	3.54203	1.66292	4.77672	0.168816	3.20485	0.670931	1005.58	29.8398	994.491	30.2972	970.108	72.2837	970.108	72.2837	103.657
247	207.386	2464.07	1.0608	13.9721	1.56911	1.53667	2.02927	0.155718	1.28679	0.634114	932.939	11.1767	945.17	12.4827	973.775	31.976	973.775	31.976	95.8064
40	163.297	12605.2	3.42425	13.9688	1.44452	1.61066	2.54181	0.163178	2.09146	0.822821	974.415	18.914	974.364	15.9244	974.253	29.4329	974.253	29.4329	100.017
146	74.0976	23162.1	2.39646	13.9039	1.79719	1.56694	3.46589	0.158012	2.96353	0.855055	945.718	26.0679	957.217	21.4856	983.756	36.5924	983.756	36.5924	96.1334
77	160.35	29704.1	1.45684	13.9021	1.26643	1.60636	2.07087	0.161965	1.63849	0.791208	967.69	14.7228	972.69	12.9603	984.009	25.7824	984.009	25.7824	98.3416
102	490.825	23403.3	1.57419	13.8957	0.398433	1.56139	1.51557	0.15736	1.46226	0.964825	942.087	12.8165	955.02	9.38114	984.955	8.10696	984.955	8.10696	95.6476
287	66.961	11389.6	1.07383	13.8649	2.28204	1.5523	3.85472	0.156096	3.10664	0.80593	935.043	27.0401	951.407	23.8093	989.433	46.4056	989.433	46.4056	94.5029
280	210.953	20874.5	0.983812	13.8545	1.06739	1.62295	2.19893	0.163078	1.92249	0.874284	973.86	17.3768	979.133	13.816	990.998	21.6885	990.998	21.6885	98.2706
97	89.8125	16755.8	2.87139	13.8531	1.54144	1.58972	3.33355	0.159722	2.95577	0.886671	955.234	26.2423	966.189	20.781	991.213	31.3285	991.213	31.3285	96.3702
34	216.315	16663.1	2.01164	13.7011	0.707222	1.66786	1.3718	0.165735	1.17545	0.856865	988.57	10.773	996.372	8.70822	1013.56	14.334	1013.56	14.334	97.534
6	182.729	8526.83	0.91481	13.6541	0.86179	1.67421	1.74071	0.165795	1.51242	0.868848	988.903	13.8657	998.787	11.066	1020.53	17.4484	1020.53	17.4484	96.9011
78	145.331	11174.5	1.99528	13.6306	0.946978	1.61916	1.6058	0.160067	1.29685	0.807606	957.15	11.5353	977.665	10.0801	1024.02	19.1622	1024.02	19.1622	93.4698
211	85.8014	19162.2	0.770607	13.6137	1.68457	1.78538	2.44216	0.176281	1.76816	0.724013	1046.63	17.0818	1040.14	15.8959	1026.53	34.0927	1026.53	34.0927	101.958
293	55.6024	1676.96	0.86848	13.4624	3.59284	1.85582	4.51033	0.181201	2.72666	0.604535	1073.53	26.9642	1065.5	29.7693	1049.12	72.4344	1049.12	72.4344	102.326
229	306.24	12495	1.22832	13.4403	1.32804	1.82648	2.16318	0.178042	1.70753	0.789361	1056.27	16.636	1055.01	14.1945	1052.44	26.7681	1052.44	26.7681	100.364
120	202.534	39379.9	2.02913	13.4333	0.735465	1.91006	2.1201	0.186092	1.98845	0.937902	1100.17	20.1114	1084.6	14.1306	1053.49	14.8341	1053.49	14.8341	104.431
212	214.215	9769.73	0.828842	13.4003	0.947156	1.78165	1.64415	0.173155	1.34392	0.817397	1029.47	12.7872	1038.78	10.6932	1058.44	19.0792	1058.44	19.0792	97.263
15	178.907	20592.3	1.15033	13.396	0.741699	1.55589	1.65989	0.151165	1.48497	0.894616	907.493	12.5704	952.835	10.2603	1059.09	14.948	1059.09	14.948	85.6863
218	406.58	21126.7	4.58975	13.3599	1.37965	1.67991	1.80455	0.162776	1.16317	0.644578	972.183	10.4968	1000.95	11.4864	1064.51	27.7482	1064.51	27.7482	91.3267
164	170.28	14896.5	1.52483	13.3559	0.843098	1.68358	1.93332	0.163083	1.7398	0.899904	973.884	15.7259	1002.34	12.3161	1065.12	16.944	1065.12	16.944	91.4346
278	507.979	10876.2	4.82757	13.3536	0.562864	1.62908	1.79129	0.157776	1.70056	0.949349	944.404	14.9392	981.503	11.2707	1065.46	11.3184	1065.46	11.3184	88.638
112	142.83	20596.9	1.44136	13.3349	1.56771	1.81357	2.16704	0.175397	1.49611	0.690393	1041.78	14.392	1050.37	14.1841	1068.29	31.5219	1068.29	31.5219	97.5187
74	140.638	21978.9	2.07376	13.3051	1.2741	1.89495	2.06582	0.182858	1.62613	0.787158	1082.57	16.2052	1079.32	13.7311	1072.78	25.5927	1072.78	25.5927	100.913
59	298.155	33085.4	4.62892	13.2421	0.473254	1.95937	1.44493	0.18818	1.36523	0.944842	1111.51	13.9385	1101.67	9.71421	1082.28	9.47364	1082.28	9.47364	102.7
227	56.7969	7875.47	0.803063	13.2309	2.29083	1.9931	3.40122	0.191257	2.51405	0.739159	1128.18	26.02	1113.18	23.0011	1083.97	45.9536	1083.97	45.9536	104.079
173	87.0471	3206.73	0.759233	13.2297	1.65059	1.78836	2.80111	0.171594	2.26314	0.807942	1020.89	21.3676	1041.23	18.2437	1084.19	33.0999	1084.19	33.0999	94.1617
5	135.138	3267.56	2.12608	13.2102	1.37427	1.88854	2.22374	0.18094	1.74826	0.786179	1072.11	17.2676	1077.07	14.7636	1087.15	27.5267	1087.15	27.5267	98.6166
99	154.6	5538.11	0.719168	13.2049	1.325	1.8168	3.00894	0.173997	2.7015	0.897825	1034.09	25.8107	1051.53	19.7083	1087.94	26.5359	1087.94	26.5359	95.0507
190	150.503	43905.3	1.2358	13.1712	0.752299	1.95912	2.14546	0.187148	2.00924	0.936508	1105.91	20.4189	1101.58	14.4237	1093.03	15.0654	1093.03	15.0654	101.178
300	265.272	24686.4	1.24896	13.148	0.522977	1.90766	1.96354	0.181911	1.89261	0.963878	1077.41	18.7782	1083.77	13.0813	1096.6	10.479	1096.6	10.479	98.2499
244	537.907	5678.67	7.51953	13.0993	0.28582	2.01028	1.64646	0.190987	1.62146	0.984817	1126.72	16.7619	1118.99	11.1647	1104	5.71429	1104	5.71429	102.058
89	195.385	19119.8	3.94587	13.0631	0.698815	2.01016	4.26253	0.190448	4.20485	0.98647	1123.8	43.3653	1118.95	28.9105	1109.51	13.9418	1109.51	13.9418	101.289
168	53.7851	7465.96	0.520958	12.9697	2.18602	2.09631	4.3048	0.19719	3.70846	0.861469	1160.21	39.3767	1147.6	29.6018	1123.82	43.5633	1123.82	43.5633	103.238
51	135.53	18324	1.04694	12.8834	0.790621	2.05515	1.86028	0.192032	1.68391	0.905193	1132.37	17.4874	1134.01	12.707	1137.16	15.711	1137.16	15.711	99.5786
191	133.483	63792.3	0.784248	12.878	0.906568	2.1154	1.45316	0.197579	1.1357	0.781537	1162.3	12.0787	1153.84	10.0193	1137.99	18.0168	1137.99	18.0168	102.136
123	58.7204	15807.4	0.946039	12.8659	1.4619	2.07046	3.60341	0.1932	3.29354	0.914007	1138.68	34.3778	1139.09	24.677	1139.87	29.0755	1139.87	29.0755	99.8962
109	173.204	34404.5	1.22048	12.7826	0.90545	2.03867	2.15813	0.189001	1.959	0.907731	1115.96	20.0741	1128.52	14.7028	1152.74	17.9915	1152.74	17.9915	96.8092
263	217.596	5889.72	1.31826	12.7527	1.04395	2.13746	3.74365	0.197696	3.59515	0.960332	1162.93	38.2553	1161	25.9023	1157.38	20.7089	1157.38	20.7089	100.48
193	112.937	40087.4	0.803402	12.6556	1.2116	2.24435	1.83159	0.206002	1.37359	0.749943	1207.48	15.1252	1195.02	12.866	1172.56	23.9814	1172.56	23.9814	102.978
188	200.47	66849.3	1.13844	12.6206	0.599994	2.21374	1.24202	0.202631	1.08748	0.875577	1189.44	11.8118	1185.4	8.68731	1178.05	11.8836	1178.05	11.8836	100.967
180	60.5958	13816.8	1.09689	12.6082	2.06674	1.91059	3.0302	0.17471	2.21601	0.731309	1038.01	21.2461	1084.79	20.1997	1179.99	40.8667	1179.99	40.8667	87.9678
160	129.329	43489.2	0.659398	12.5999	1.14035	2.17075	2.16198	0.19837	1.83679	0.849584	1166.56	19.6003	1171.72	15.0301	1181.3	22.5418	1181.3	22.5418	98.7521
181	152.718	7379.93	0.879071	12.5726	1.38009	1.8333	3.17309	0.16717	2.85724	0.900461	996.5	26.3811	1057.46	20.8504	1185.58	27.2643	1185.58	27.2643	84.052
35	340.293	28022.9	1.25547	12.5484	0.447389	2.1994	1.21696	0.200166	1.13174	0.929973	1176.21	12.1678	1180.85	8.49477	1189.39	8.8324	1189.39	8.8324	98.8921
52	241.365	14552.6	3.23619	12.5323	0.449773	2.15415	1.54492	0.195797	1.478	0.956683	1152.7	15.6006	1166.39	10.7138	1191.88	8.8764	1191.88	8.8764	96.7128
151	251.563	43464.1	1.83366	12.4795	0.406352	2.1336	1.4172	0.193111	1.3577	0.958012	1138.21	14.166	1159.75	9.79815	1200.21	8.02166	1200.21	8.02166	94.8339
130	378.194	22375.7	2.25716	12.3052	0.44139	1.88186	2.57667	0.167948	2.53859	0.985219	1000.8	23.5323	1074.72	17.0862	1227.88	8.66613	1227.88	8.66613	81.5064
90	204.393	29206.5	1.79961	12.2654	0.394314	2.40456	1.33348	0.213903	1.27384	0.95528	1249.58	14.4699	1243.96	9.56318	1234.27	7.75338	1234.27	7.75338	101.24
170	486.612	58159.9	0.752191	12.2361	0.322761	2.38382	1.38338	0.211552	1.3452	0.972402	1237.08	15.1419	1237.76	9.89582	1238.92	6.30916	1238.92	6.30916	99.8513
111	91.1595	34926.8	7.83994	12.01	1.32206	2.62263	2.45448	0.228444	2.068	0.842542	1326.34	24.7911	1307	18.0446	1275.39	25.7646	1275.39	25.7646	103.994
98	79.2474	14051.7	0.968731	12.005	1.12481	2.57011	2.52116	0.223776	2.25634	0.894959	1301.8	26.5972	1292.17	18.431	1276.2	21.9337	1276.2	21.9337	102.006
272	143.609	20027.3	1.21925	11.9072	1.01564	2.7198	1.41586	0.234879	0.986484	0.696737	1360.02	12.0957	1333.88	10.512	1292.13	19.7492	1292.13	19.7492	105.254
25	100.659	24515.2	1.7314	11.8613	0.929053	2.67459	1.53312	0.230085	1.21956	0.795473	1334.95	14.7053	1321.46	11.3311	1299.64	18.0553	1299.64	18.0553	102.716
277	118.738	14155.1	1.15343	11.7419	1.21544	2.71124	1.99438	0.230891	1.58122	0.79284	1339.16	19.1205	1331.54	14.7951	1319.28	23.556	1319.28	23.556	101.507
297	124.337	13439.5	0.857715	11.674	0.953363	2.7758	2.46972	0.235021	2.27829	0.92249	1360.76	27.9487	1349.05	18.4376	1330.51	18.4484	1330.51	18.4484	102.274
264	227.018	29652.2	1.73211	11.3733	0.501854	2.80957	1.33825	0.231752	1.24058	0.927021	1343.68	15.0469	1358.09	10.0218	1380.83	9.64296	1380.83	9.64296	97.3091
169	471.012	7254.44	1.7773	11.3724	0.235603	2.63474	1.16911	0.217314	1.14513	0.979484	1267.67	13.1783	1310.39	8.60519	1380.98	4.52692	1380.98	4.52692	91.7946
145	267.39	81486.8	2.16705	11.2467	0.429878	2.86977	1.91296	0.234084	1.86403	0.974424	1355.87	22.793	1374.01	14.4055	1402.31	8.23579	1402.31	8.23579	96.6885
62	322.875	25079.7	1.27721	11.2143	0.222262	2.79378	1.00241	0.227229	0.977461	0.975109	1319.96	11.6669	1353.87	7.49556	1407.83	4.25499	1407.83	4.25499	93.758
57	314.152	13157.9	0.613952	11.194	0.436567	2.53414	2.10275	0.205737	2.05693	0.97821	1206.07	22.6256	1281.89	15.3108	1411.31	8.35372	1411.31	8.35372	85.4574
203	76.339	13170.8	0.876763	11.0632	1.0985	3.14406	1.65121	0.252274	1.2328	0.746605	1450.19	16.0098	1443.55	12.721	1433.75	20.9564	1433.75	20.9564	101.147
63	188.125	43859.4	1.90928	10.9881	0.42968	3.01832	1.16567	0.240539	1.08359	0.929583	1389.5	13.5443	1412.26	8.89073	1446.75	8.18257	1446.75	8.18257	96.0427
165	371.21	152693	0.897	10.9205	0.314992	3.21955	1.13588	0.254999	1.09133	0.96078	1464.2	14.2946	1461.88	8.8004	1458.48	5.98903	1458.48	5.98903	100.393
92	389.443	9429.34	2.14588	10.8612	0.738621	2.57971	2.0756	0.203212	1.93974	0.93454	1192.55	21.1188	1294.9	15.189	1468.82	14.0242	1468.82	14.0242	81.191
20	147.272	16235.3	1.09781	10.7295	0.590793	3.27509	1.70885	0.25486	1.60348	0.938336	1463.49	20.9937	1475.15	13.2934	1491.95	11.1827	1491.95	11.1827	98.0923
260	161.16	3885.78	0.814785	10.6365	0.843781	3.28854	2.9787	0.253689	2.85669	0.95904	1457.47	37.2647	1478.34	23.1967	1508.41	15.9349	1508.41	15.9349	96.6227
101	223.028	61482.4	1.14486	10.5797	0.411394	3.17642	2.01538	0.243731	1.97295	0.978944	1406.06	24.9242	1451.44	15.5652	1518.52	7.75788	1518.52	7.75788	92.5947
107	83.5939	16039.8	0.615758	10.4846	1.3082	3.21823	4.36688	0.24472	4.16632	0.954073	1411.19	52.8054	1461.56	33.8414	1535.52	24.6183	1535.52	24.6183	91.9027
150	80.3525	24523.2	1.09781	10.3625	1.64815	3.55535	2.69281	0.267206	2.12951	0.790814	1526.6	28.9467	1539.63	21.3432	1557.54	30.927	1557.54	30.927	98.0137
159	168.432	65814.3	2.0033	10.3162	0.614625	3.74344	1.90351	0.280084	1.80155	0.946436	1591.78	25.4106	1580.71	15.2544	1565.95	11.5188	1565.95	11.5188	101.65
225	81.2153	17980.7	1.29894	10.2872	1.10927	3.61749	2.10434	0.269899	1.78823	0.849782	1540.29	24.5006	1553.38	16.7412	1571.22	20.7764	1571.22	20.7764	98.0314
253	116.139	8425.56	1.129	10.1595	0.783866	3.35836	3.3719	0.247455	3.27952	0.972604	1425.34	41.9379	1494.74	26.388	1594.58	14.638	1594.58	14.638	89.3863
209	52.1014	12464.8	0.925076	10.1401	1.57085	3.89938	2.39579	0.28677	1.80894	0.755049	1625.37	25.9884	1613.55	19.3636	1598.15	29.3185	1598.15	29.3185	101.703
82	52.6827	20138.9	0.802825	10.003	1.11813	3.85302	2.03125	0.27953	1.69581	0.83486	1588.99	23.8823	1603.9	16.3765	1623.51	20.8006	1623.51	20.8006	97.8739
194	272.206	8210.92	0.688198	9.97988	0.433344	3.96823	2.40923	0.287224	2.36994	0.983691	1627.64	34.0899	1627.72	19.5414	1627.81	8.05582	1627.81	8.05582	99.9898
157	107.281	52174.8	1.31584	9.94479	0.689612	4.19317	1.58018	0.302438	1.42176	0.899746	1703.39	21.2826	1672.69	12.956	1634.36	12.8117	1634.36	12.8117	104.224
210	107.984	23510.4	1.25461	9.93512	0.536191	4.07502	1.58687	0.293631	1.49354	0.941185	1659.65	21.8538	1649.32	12.9386	1636.16	9.95909	1636.16	9.95909	101.435
236	84.7264	17998.2	3.11355	9.90606	1.03673	4.00995	2.27661	0.288097	2.02685	0.890294	1632.01	29.2236	1636.22	18.5043	1641.6	19.243	1641.6	19.243	99.4158
133	495.305	27780	15.4439	9.59748	0.17989	4.44797	2.22149	0.309612	2.21419	0.996716	1738.8	33.7453	1721.32	18.4183	1700.12	3.31232	1700.12	3.31232	102.275
1	54.0028	11335.2	0.803398	9.50311	1.10628	4.37665	1.79059	0.301653	1.40797	0.786315	1699.5	21.0341	1707.94	14.8009	1718.3	20.333	1718.3	20.333	98.906
137	132.955	35932.7	1.02471	9.37897	0.447882	4.33512	1.70673	0.294886	1.64691	0.964953	1665.9	24.1777	1700.07	14.0825	1742.43	8.20579	1742.43	8.20579	95.6081
71	141.114	25497.6	1.2446	9.27402	0.511134	4.6287	1.80314	0.311333	1.72918	0.958981	1747.26	26.465	1754.46	15.0571	1763.02	9.34271	1763.02	9.34271	99.1062
286	97.4635	35948.8	1.8348	9.24774	1.06745	4.76184	1.66265	0.319381	1.27474	0.766693	1786.71	19.8922	1778.2	13.9532	1768.21	19.4973	1768.21	19.4973	101.046
265	181.591	42069	0.91759	9.14413	0.429405	4.93851	1.59354	0.327519	1.53459	0.96301	1826.35	24.4067	1808.86	13.4566	1788.76	7.82393	1788.76	7.82393	102.101
43	218.483	37336.4	1.66228	9.13537	0.269816	4.87132	1.07864	0.322754	1.04434	0.968208	1803.17	16.4269	1797.31	9.08715	1790.5	4.91508	1790.5	4.91508	100.707
261	143.763	9521.6	1.16285	9.05822	0.551456	5.08379	3.27244	0.333986	3.22564	0.985699	1857.67	52.062	1833.4	27.773	1805.94	10.0265	1805.94	10.0265	102.865
270	165.45	27140.8	0.849814	8.63803	0.402468	5.55775	2.41873	0.348187	2.38501	0.986059	1925.94	39.7079	1909.58	20.8172	1891.84	7.23996	1891.84	7.23996	101.802
68	19.4255	6197.98	0.62827	8.62577	2.05115	5.28699	3.87074	0.330754	3.28259	0.848053	1842.03	52.5959	1866.76	33.0631	1894.39	36.8965	1894.39	36.8965	97.2361
161	181.16	90031.9	2.12201	8.35159	0.216069	5.78716	1.28791	0.350537	1.26966	0.985827	1937.16	21.2438	1944.49	11.1509	1952.3	3.86008	1952.3	3.86008	99.2247
284	437.208	11928	1.32729	7.94454	0.167055	5.15534	1.57536	0.297047	1.56648	0.994362	1676.65	23.1267	1845.28	13.398	2041.09	2.95391	2041.09	2.95391	82.1448
262	185.403	65142.8	1.9993	7.20448	0.208219	7.95854	1.05963	0.415848	1.03897	0.980504	2241.6	19.6717	2226.34	9.55859	2212.31	3.61201	2212.31	3.61201	101.324
155	264.177	65653.3	1.60383	6.49168	0.196659	8.21639	1.63041	0.386845	1.6185	0.992699	2108.18	29.1034	2255.15	14.7597	2391.29	3.34751	2391.29	3.34751	88.161
53	94.4552	31910.2	0.867175	6.45169	0.49201	7.77869	1.54167	0.363981	1.46105	0.947707	2001.02	25.1337	2205.74	13.8716	2401.8	8.36585	2401.8	8.36585	83.3133
7	58.9347	21477.8	1.36794	6.29914	0.323027	9.33531	4.27799	0.42649	4.26578	0.997145	2289.87	82.2205	2371.49	39.2547	2442.4	5.46984	2442.4	5.46984	93.7553
44	396.882	80278.2	2.41896	6.2478	0.115712	9.40495	0.839178	0.42617	0.831162	0.990448	2288.43	16.0109	2378.31	7.70209	2456.24	1.95657	2456.24	1.95657	93.1678
192	225.852	73547.6	1.23056	6.23346	0.216971	9.54263	1.75736	0.431416	1.74392	0.992349	2312.1	33.8827	2391.66	16.1528	2460.13	3.66733	2460.13	3.66733	93.9829
142	46.0812	25953.8	0.390408	6.23334	0.611679	9.34123	1.53641	0.422303	1.4094	0.917332	2270.92	26.9765	2372.08	14.0928	2460.16	10.3361	2460.16	10.3361	92.308
213	180.416	24923.2	0.751705	6.22894	0.368713	9.43259	1.82805	0.426132	1.79048	0.979448	2288.26	34.4887	2381.01	16.7841	2461.35	6.22855	2461.35	6.22855	92.9674
93	323.049	61017.1	3.42185	6.20826	0.131218	9.88332	0.933965	0.445012	0.924701	0.990081	2373.04	18.3578	2423.95	8.61217	2466.97	2.21357	2466.97	2.21357	96.1925
242	100.393	31168	1.45295	6.11422	0.290582	10.3041	0.928665	0.456932	0.882033	0.949785	2426	17.8327	2462.48	8.59555	2492.71	4.89555	2492.71	4.89555	97.3235
248	280.208	52208.4	2.78109	6.07509	0.136863	10.6075	1.05899	0.467373	1.05011	0.991613	2472.03	21.5614	2489.36	9.82673	2503.53	2.30328	2503.53	2.30328	98.742
220	177.346	30985	1.92183	6.04301	0.171522	10.1649	1.15032	0.445507	1.13746	0.988821	2375.25	22.599	2449.89	10.6344	2512.43	2.88412	2512.43	2.88412	94.5398
46	231.755	30196.4	2.08266	6.04006	0.170401	9.66858	2.83319	0.423548	2.82806	0.99819	2276.57	54.2435	2403.72	26.077	2513.25	2.86504	2513.25	2.86504	90.5827
201	89.8929	30932.7	0.722199	6.0208	0.371568	10.9315	2.09591	0.477345	2.06271	0.98416	2515.69	42.9649	2517.32	19.5003	2518.62	6.244	2518.62	6.244	99.8839
197	115.183	32180.4	0.470953	5.80888	0.3987	10.6062	5.04915	0.446837	5.03338	0.996877	2381.18	100.217	2489.25	46.8841	2578.65	6.66046	2578.65	6.66046	92.342
115	617.692	148963	5.93629	5.77675	0.741362	12.6064	2.67958	0.528168	2.57498	0.960965	2733.73	57.3726	2650.7	25.2135	2587.91	12.3707	2587.91	12.3707	105.635
144	151.106	36792.9	1.17579	5.65968	0.424228	10.6588	2.03369	0.437522	1.98895	0.978001	2339.54	39.024	2493.84	18.8807	2622.02	7.05734	2622.02	7.05734	89.2266
204	280.097	71258.4	1.3588	5.38579	0.141214	13.257	1.46886	0.517836	1.46206	0.995368	2690	32.1554	2698.12	13.8693	2704.2	2.33102	2704.2	2.33102	99.4748
96	102.018	39717.4	1.71394	5.36609	0.260462	12.7446	1.59415	0.496002	1.57273	0.986562	2596.59	33.6146	2660.96	15.0102	2710.25	4.29699	2710.25	4.29699	95.8064
18	259.726	22405.3	1.13804	5.25238	0.151393	11.5913	3.68571	0.441558	3.6826	0.999156	2357.61	72.7189	2571.97	34.4651	2745.52	2.48951	2745.52	2.48951	85.8713
176	80.2233	9999.3	0.618203	5.18816	0.399644	13.2427	6.5322	0.498296	6.51996	0.998127	2606.47	139.804	2697.1	61.7459	2765.73	6.55937	2765.73	6.55937	94.2416
21	84.4214	27176.7	1.27875	5.0547	0.287236	14.8755	2.44017	0.54534	2.42321	0.993048	2805.76	55.1268	2807.31	23.2204	2808.41	4.69618	2808.41	4.69618	99.9056
199	177.064	14211.5	1.71784	4.90264	0.186727	14.0351	1.64558	0.499049	1.63495	0.993541	2609.71	35.0876	2752.08	15.5988	2858.23	3.0393	2858.23	3.0393	91.305
116	183.55	83412.1	1.36363	4.53821	0.166113	17.8862	1.2483	0.58871	1.2372	0.991106	2984.19	29.554	2983.63	12.0044	2983.25	2.67437	2983.25	2.67437	100.032
41	430.444	11520.5	1.38205	4.45572	0.136718	15.2814	1.31149	0.493832	1.30435	0.994552	2587.23	27.7966	2832.94	12.4994	3012.74	2.1957	3012.74	2.1957	85.8764
182	112.731	13692.6	0.700054	4.28788	0.153078	18.8163	3.32937	0.585162	3.32584	0.998942	2969.78	79.1488	3032.45	32.1106	3074.24	2.44576	3074.24	2.44576	96.602
85	145.553	57566.1	1.31777	3.83896	0.155625	21.5299	1.44002	0.599452	1.43159	0.994143	3027.63	34.5879	3162.76	13.9737	3249.65	2.45154	3249.65	2.45154	93.168
118	28.1099	47371.7	1.81099	3.66258	0.626263	26.414	3.52628	0.701649	3.47022	0.984103	3426.9	92.2475	3361.99	34.5124	3323.52	9.80896	3323.52	9.80896	103.111
140	203.411	131300	2.98469	3.59719	0.155555	24.8965	2.2252	0.649531	2.21976	0.997554	3226.37	56.3475	3304.16	21.7252	3351.69	2.43142	3351.69	2.43142	96.2611
55	178.193	44284.2	74.9884	3.57611	0.12634	26.6548	2.27636	0.69133	2.27286	0.998459	3387.69	59.8907	3370.87	22.2816	3360.88	1.97334	3360.88	1.97334	100.798
153	297.602	122853	11.4164	3.36368	0.109936	30.1819	1.63357	0.736309	1.62987	0.997733	3556.88	44.5565	3492.75	16.0564	3456.18	1.70483	3456.18	1.70483	102.914
Sample:	8LQ-5		N29.15216	E88.09645
8LQ5-13	135.441	9527.62	1.14859	26.1265	26.9682	0.0535618	27.1728	0.0101493	3.32886	0.122507	65.0967	2.15607	52.9792	14.0277	-466.087	723.667	65.0967	2.15607	NA
8LQ5-115	1591.57	17052.8	13.2192	18.7861	2.19632	0.0800668	2.5314	0.0109091	1.25864	0.497212	69.9436	0.875582	78.2077	1.90543	338.626	49.7527	69.9436	0.875582	NA
8LQ5-97	105.05	5983.11	0.621728	28.2594	20.1603	0.0553588	21.506	0.0113461	7.48795	0.34818	72.7301	5.41539	54.7096	11.455	-678.171	561.704	72.7301	5.41539	NA
8LQ5-75	237.634	26632.1	1.00779	20.7965	6.30829	0.0876958	7.27661	0.0132272	3.62692	0.498435	84.7089	3.05223	85.3546	5.9571	103.477	149.242	84.7089	3.05223	NA
8LQ5-22	124.246	5255.74	0.941448	19.5694	26.4228	0.0939598	26.6334	0.0133358	3.34265	0.125506	85.3999	2.83579	91.1854	23.2313	245.348	618.091	85.3999	2.83579	NA
8LQ5-55	247.68	18046.4	0.96697	19.4281	14.7969	0.0972089	15.3784	0.0136973	4.18861	0.27237	87.6994	3.64851	94.1967	13.8351	262	341.382	87.6994	3.64851	NA
8LQ5-28	138.775	8591.66	1.06	20.6817	17.6026	0.092662	17.7978	0.0138991	2.62907	0.147718	88.9821	2.32333	89.9801	15.3266	116.514	417.866	88.9821	2.32333	NA
8LQ5-103	227.208	18066	0.781164	19.7064	8.66602	0.0973526	9.31737	0.0139141	3.4225	0.367325	89.0775	3.02771	94.3296	8.39333	229.238	200.489	89.0775	3.02771	NA
8LQ5-48	335.699	34944.1	0.795994	21.0692	7.89365	0.0922906	9.06144	0.0141028	4.44972	0.491061	90.2772	3.98908	89.6349	7.77419	72.568	187.917	90.2772	3.98908	NA
8LQ5-81	565.66	57969.6	1.22665	20.7992	3.14684	0.106108	3.23163	0.0160063	0.735454	0.227579	102.366	0.746912	102.399	3.14777	103.126	74.4006	102.366	0.746912	NA
8LQ5-7	29.9697	4706.73	0.964459	14.9919	111.15	0.149833	112.698	0.0162915	18.6134	0.165162	104.176	19.2348	141.764	150.2	828.487	501.482	104.176	19.2348	NA
8LQ5-43	35.7084	2454.88	0.992195	39.1304	153.447	0.0578439	153.796	0.0164161	10.3534	0.067319	104.966	10.7795	57.0978	85.5927	NA	NA	104.966	10.7795	NA
8LQ5-41	34.9443	2941.16	1.03712	13.3027	212.346	0.170671	212.556	0.0164664	9.43999	0.0444118	105.285	9.85816	160.001	325.346	1073.14	947.764	105.285	9.85816	NA
8LQ5-88	99.4205	10761.8	1.70917	22.3279	28.2047	0.105373	28.3166	0.0170638	2.51525	0.0888259	109.072	2.72036	101.724	27.4155	-67.2043	700.534	109.072	2.72036	NA
8LQ5-96	62.9478	6403.88	1.47452	25.1436	34.3263	0.0993542	34.4378	0.0181181	2.76883	0.0804008	115.751	3.17635	96.18	31.6122	-365.745	911.527	115.751	3.17635	NA
8LQ5-76	517.394	12652.2	30.4491	15.2286	12.5159	0.168081	15.7197	0.0185643	9.51111	0.605043	118.576	11.1748	157.752	22.9718	795.722	263.381	118.576	11.1748	NA
8LQ5-99	86.8475	7707.86	0.715013	20.2133	16.3876	0.131487	16.6633	0.019276	3.01833	0.181137	123.079	3.67969	125.433	19.6642	170.254	384.869	123.079	3.67969	NA
8LQ5-98	577.3	11881.8	1.68046	20.8877	2.47897	0.132251	2.68716	0.020035	1.03709	0.385941	127.877	1.31313	126.119	3.187	93.1225	58.7249	127.877	1.31313	NA
8LQ5-73	152.204	16800.9	0.941079	19.9875	10.3421	0.138396	10.5424	0.0200623	2.04531	0.194007	128.05	2.59318	131.614	13.0144	196.468	240.859	128.05	2.59318	NA
8LQ5-70	313.158	78163.4	1.16516	20.3383	5.17208	0.137994	5.49044	0.0203551	1.84242	0.335569	129.9	2.36935	131.255	6.76025	155.883	121.177	129.9	2.36935	NA
8LQ5-78	128.565	9057.36	0.696641	21.0561	13.4474	0.134966	13.6612	0.020611	2.40747	0.176227	131.516	3.13415	128.55	16.4967	74.0416	320.854	131.516	3.13415	NA
8LQ5-14	111.671	9896.65	0.98415	19.8751	13.0018	0.14631	14.1138	0.0210902	5.49102	0.389054	134.542	7.31119	138.648	18.2933	209.544	302.491	134.542	7.31119	NA
8LQ5-6	474.194	75143.5	0.716238	20.22	2.39334	0.144199	2.73088	0.0211466	1.31517	0.481591	134.899	1.75571	136.777	3.49458	169.482	55.9058	134.899	1.75571	NA
8LQ5-31	85.7498	10092.2	1.09637	23.5325	11.7481	0.136447	11.9762	0.0232879	2.32607	0.194225	148.402	3.41252	129.875	14.6014	-197.119	295.028	148.402	3.41252	NA
8LQ5-69	142.369	3444.98	1.08313	15.0182	21.7065	0.225625	24.2714	0.0245756	10.8595	0.447418	156.509	16.7914	206.58	45.3987	824.845	458.102	156.509	16.7914	NA
8LQ5-37	107.189	16836.5	1.49773	19.9288	7.68041	0.177023	8.63979	0.0255864	3.95692	0.457988	162.866	6.36376	165.496	13.1948	203.283	178.473	162.866	6.36376	NA
8LQ5-80	79.1277	12654.1	1.27555	21.4973	9.5576	0.164246	9.95898	0.025608	2.79885	0.281038	163.001	4.50497	154.413	14.2667	24.5159	229.751	163.001	4.50497	NA
8LQ5-66	244.018	20794.1	1.44801	19.3579	5.16803	0.199212	6.32553	0.0279687	3.64743	0.57662	177.823	6.39732	184.459	10.67	270.3	118.54	177.823	6.39732	NA
8LQ5-84	152.954	25197.3	1.04167	20.3537	14.3619	0.190744	14.5611	0.0281575	2.40061	0.164865	179.006	4.23813	177.264	23.6885	154.07	337.833	179.006	4.23813	NA
8LQ5-113	72.7512	17581.3	1.12902	18.1024	7.79618	0.220145	9.14414	0.0289031	4.77859	0.522585	183.679	8.65342	202.031	16.7537	421.98	174.223	183.679	8.65342	NA
8LQ5-116	1103.78	2377.46	1.53298	19.5518	4.65314	0.207545	8.16484	0.0294305	6.70916	0.821714	186.983	12.3648	191.491	14.25	247.407	107.174	186.983	12.3648	NA
8LQ5-26	169.043	25360.6	1.40659	19.7685	6.04119	0.208577	6.33471	0.0299046	1.90592	0.30087	189.951	3.56751	192.358	11.1011	222.009	139.841	189.951	3.56751	NA
8LQ5-33	371.186	44197.3	1.82974	19.5785	1.98907	0.242833	3.24917	0.0344816	2.56918	0.79072	218.536	5.52049	220.738	6.44619	244.266	45.8169	218.536	5.52049	NA
8LQ5-46	706.896	48308.7	0.852229	19.1379	3.88844	0.251818	7.97861	0.0349527	6.96694	0.873202	221.471	15.1678	228.052	16.2982	296.469	88.7538	221.471	15.1678	NA
8LQ5-111	164.371	23135.2	1.09954	19.342	7.46549	0.252284	8.0402	0.0353908	2.98518	0.371282	224.2	6.57773	228.43	16.4483	272.183	171.32	224.2	6.57773	NA
8LQ5-25	689.652	20872.5	0.708874	19.4595	0.946845	0.261017	1.57859	0.0368383	1.2631	0.800145	233.205	2.89297	235.487	3.31778	258.317	21.7794	233.205	2.89297	NA
8LQ5-54	213.145	21431.1	2.59072	19.4779	4.2941	0.270301	4.70801	0.0381846	1.93031	0.410006	241.57	4.57678	242.934	10.1724	256.114	98.7613	241.57	4.57678	NA
8LQ5-64	340.324	19798.8	0.687029	19.4256	2.70983	0.2803	3.08151	0.0394908	1.46716	0.476116	249.676	3.59311	250.896	6.85033	262.335	62.2257	249.676	3.59311	NA
8LQ5-117	735.856	22579.6	1.0474	19.5471	1.33084	0.314376	2.95341	0.0445688	2.63657	0.892721	281.091	7.25191	277.567	7.17284	247.98	30.6494	281.091	7.25191	NA
8LQ5-104	58.548	17412.8	0.754646	19.0713	6.95424	0.369241	9.41777	0.0510727	6.35082	0.674344	321.104	19.8932	319.091	25.793	304.395	158.629	321.104	19.8932	NA
8LQ5-30	222.421	61544.5	1.23622	18.1643	1.49269	0.459418	2.47184	0.0605238	1.97025	0.797076	378.81	7.24844	383.853	7.90111	414.353	33.3629	378.81	7.24844	NA
8LQ5-110	450.979	5728.21	0.921222	16.9469	0.526334	0.50188	2.1243	0.0616864	2.05806	0.968819	385.873	7.70851	412.974	7.20805	567.404	11.4584	385.873	7.70851	NA
8LQ5-102	383.441	116486	10.4313	17.76	1.07174	0.577252	9.21473	0.0743544	9.15219	0.993213	462.336	40.8327	462.694	34.2564	464.465	23.768	462.336	40.8327	99.5417
8LQ5-109	187.21	8316.73	0.642282	17.7819	1.90923	0.595564	4.78593	0.0768079	4.38862	0.916983	477.041	20.1797	474.415	18.1408	461.712	42.3456	477.041	20.1797	103.32
8LQ5-79	320.994	131016	0.903353	17.3848	0.68935	0.631482	1.27548	0.0796214	1.07315	0.841368	493.863	5.10196	497.018	5.01287	511.601	15.1662	493.863	5.10196	96.5329
8LQ5-101	122.816	28801.8	1.18054	17.6498	3.2466	0.633346	3.83626	0.0810736	2.04364	0.532717	502.528	9.87977	498.178	15.1054	478.219	71.7962	502.528	9.87977	105.083
8LQ5-16	825.01	5943.22	2.32175	14.8079	0.877895	0.769529	1.47159	0.0826452	1.18105	0.802568	511.893	5.81192	579.493	6.49817	854.194	18.2379	511.893	5.81192	59.927
8LQ5-51	598.557	246110	1.63559	17.3618	0.590651	0.674333	4.47328	0.0849116	4.43412	0.991244	525.373	22.3717	523.343	18.2951	514.474	12.9767	525.373	22.3717	102.119
8LQ5-39	62.2664	18726	1.04737	17.5386	7.45776	0.688136	8.36203	0.087532	3.78225	0.452312	540.925	19.6243	531.68	34.6239	492.219	164.657	540.925	19.6243	109.895
8LQ5-91	217.4	121174	4.93196	16.9452	1.20748	0.719574	1.896	0.0884341	1.46178	0.770982	546.269	7.65628	550.415	8.05622	567.63	26.2746	546.269	7.65628	96.2369
8LQ5-50	436.651	358165	3.83957	17.1132	0.864768	0.714086	1.07316	0.0886297	0.635492	0.592169	547.428	3.33525	547.17	4.53958	546.072	18.8732	547.428	3.33525	100.248
8LQ5-3	383.687	165470	2.24798	16.9675	0.876321	0.729468	2.32581	0.0897682	2.1544	0.926302	554.166	11.4402	556.241	9.9612	564.722	19.0756	554.166	11.4402	98.1307
8LQ5-4	117.348	16936.5	0.751581	16.0594	13.5342	0.773979	17.0877	0.0901482	10.4315	0.610467	556.413	55.6092	582.043	75.8406	683.377	290.218	556.413	55.6092	81.4211
8LQ5-59	61.6928	2897.04	0.210503	17.2358	6.21986	0.748567	12.4986	0.0935751	10.841	0.867381	576.646	59.8016	567.392	54.3818	530.494	136.388	576.646	59.8016	108.7
8LQ5-8	31.4323	18753.8	1.27578	16.9689	13.6933	0.761173	14.0073	0.0936778	2.94939	0.210561	577.251	16.2854	574.687	61.5457	564.537	299.513	577.251	16.2854	102.252
8LQ5-49	688.756	31052.4	2.73541	16.2769	0.517421	0.830957	1.5353	0.0980957	1.44549	0.941499	603.239	8.32419	614.143	7.07508	654.535	11.0999	603.239	8.32419	92.163
8LQ5-17	512.59	313568	5.48573	16.5766	0.694853	0.830285	1.28552	0.0998211	1.08154	0.841328	613.36	6.32793	613.77	5.92135	615.262	15.0265	613.36	6.32793	99.6909
8LQ5-87	162.443	120802	0.640072	16.2843	1.70081	0.882104	3.02695	0.104181	2.50393	0.827213	638.864	15.2296	642.118	14.4059	653.576	36.5035	638.864	15.2296	97.749
8LQ5-32	386.194	248006	1.47624	15.9712	0.612949	0.979707	0.706022	0.113483	0.350372	0.496262	692.946	2.30195	693.455	3.54769	695.113	13.0782	692.946	2.30195	99.6883
8LQ5-62	26.1522	20319.1	0.457457	15.4991	8.98897	1.11775	10.4221	0.125647	5.27423	0.506064	762.984	37.9518	761.899	55.9104	758.696	189.933	762.984	37.9518	100.565
8LQ5-52	126.751	136026	2.09687	14.9448	1.53112	1.26579	2.185	0.137199	1.55881	0.713414	828.805	12.1235	830.507	12.395	835.045	31.9242	828.805	12.1235	99.2527
8LQ5-42	175.345	195174	1.69542	14.5998	0.702645	1.37333	1.44568	0.145419	1.26344	0.873941	875.231	10.3402	877.591	8.49431	883.568	14.5119	875.231	10.3402	99.0564
8LQ5-112	232.335	29643.2	1.59383	14.347	0.487326	1.47701	1.91531	0.153688	1.85228	0.967089	921.606	15.9066	921.004	11.597	919.582	10.0358	919.582	10.0358	100.22
8LQ5-20	175.16	110470	1.75942	14.3368	0.837609	1.44819	2.42918	0.150583	2.2802	0.938672	904.231	19.2376	909.122	14.5915	921.039	17.2187	921.039	17.2187	98.1751
8LQ5-71	525.917	139439	6.18437	14.0139	0.70541	1.61215	3.28182	0.163857	3.20511	0.976626	978.173	29.089	974.944	20.5689	967.672	14.4091	967.672	14.4091	101.085
8LQ5-36	125.856	50244.6	2.5292	13.8573	3.60758	1.34208	7.12264	0.134883	6.14145	0.862243	815.66	47.0546	864.131	41.4657	990.593	73.3924	990.593	73.3924	82.3406
8LQ5-90	109.814	135712	0.899946	13.6975	1.2804	1.69631	1.57375	0.168517	0.915034	0.581433	1003.93	8.50676	1007.14	10.0535	1014.11	25.9421	1014.11	25.9421	98.997
8LQ5-107	102.038	49817	1.62837	13.6274	1.68427	1.67052	2.66416	0.165106	2.06422	0.77481	985.092	18.8571	997.385	16.9234	1024.49	34.0791	1024.49	34.0791	96.154
8LQ5-29	231.149	776031	4.37431	13.6055	0.625044	1.69745	1.78188	0.167498	1.66865	0.936458	998.313	15.4326	1007.57	11.386	1027.74	12.6403	1027.74	12.6403	97.1366
8LQ5-72	224.38	93719.8	1.69976	13.5837	2.36804	1.75396	6.00695	0.172797	5.52049	0.919017	1027.5	52.4346	1028.62	38.8649	1030.98	47.8668	1030.98	47.8668	99.6623
8LQ5-93	47.9648	39967.3	1.4563	13.5674	2.75675	1.80836	2.9954	0.177942	1.17167	0.391155	1055.72	11.4098	1048.48	19.5871	1033.42	55.719	1033.42	55.719	102.158
8LQ5-60	55.6142	49169.1	0.806714	13.4718	2.29241	1.77756	3.26159	0.173679	2.32009	0.711337	1032.35	22.1321	1037.29	21.1974	1047.73	46.2436	1047.73	46.2436	98.5323
8LQ5-1	154.907	179239	4.83714	13.4483	1.31771	1.72137	3.81663	0.167896	3.58194	0.938509	1000.51	33.1953	1016.53	24.5177	1051.24	26.5703	1051.24	26.5703	95.1746
8LQ5-95	207.491	308814	1.39972	13.4271	0.588282	1.79047	2.41599	0.17436	2.34327	0.969902	1036.09	22.4279	1041.99	15.7416	1054.42	11.8688	1054.42	11.8688	98.2609
8LQ5-18	384.937	104604	0.482186	13.2819	0.431247	1.83201	1.31378	0.176476	1.24098	0.944591	1047.69	12.0002	1057	8.6297	1076.29	8.65705	1076.29	8.65705	97.3431
8LQ5-12	198.943	299765	1.21513	13.2116	0.71071	1.93991	1.10562	0.185882	0.846932	0.766022	1099.03	8.55782	1094.97	7.40786	1086.9	14.2264	1086.9	14.2264	101.116
8LQ5-2	23.1908	16644	0.48448	13.1909	6.6905	1.97254	7.12913	0.188712	2.46206	0.345351	1114.4	25.1966	1106.18	48.0717	1090.05	134.185	1090.05	134.185	102.234
8LQ5-89	298.073	72461.1	1.36512	13.1178	0.264139	1.94612	1.45936	0.185152	1.43526	0.983484	1095.06	14.4545	1097.11	9.78872	1101.16	5.29626	1101.16	5.29626	99.4454
8LQ5-105	25.5327	43384.8	0.58347	12.7588	3.13302	2.09107	3.38012	0.193499	1.26863	0.37532	1140.3	13.2589	1145.88	23.2219	1156.43	62.1696	1156.43	62.1696	98.6054
8LQ5-83	55.7294	83413.8	1.05605	12.7126	1.40442	2.12766	1.97914	0.196172	1.39449	0.704595	1154.72	14.7427	1157.83	13.6715	1163.62	27.8334	1163.62	27.8334	99.2353
8LQ5-24	7.28407	5416.52	0.672646	12.6783	9.11934	2.13536	9.87731	0.19635	3.7946	0.384173	1155.68	40.1477	1160.32	68.4083	1168.98	180.952	1168.98	180.952	98.8621
8LQ5-9	300.039	176471	0.602012	12.5376	0.322749	2.3475	3.02471	0.213461	3.00744	0.994291	1247.23	34.1046	1226.8	21.5409	1191.06	6.36992	1191.06	6.36992	104.716
8LQ5-40	217.384	335452	1.68692	12.5076	0.451323	2.29093	2.30255	0.207818	2.25788	0.980602	1217.18	25.044	1209.49	16.2768	1195.78	8.88439	1195.78	8.88439	101.79
8LQ5-94	147.536	205806	0.518818	12.4481	0.616421	2.25991	1.16431	0.204029	0.98775	0.848354	1196.93	10.79	1199.88	8.19586	1205.18	12.1255	1205.18	12.1255	99.3153
8LQ5-21	14.0147	27749.5	0.413622	12.4184	6.04867	2.30525	7.00739	0.207627	3.53795	0.504889	1216.16	39.2128	1213.9	49.6646	1209.91	119.177	1209.91	119.177	100.517
8LQ5-38	231.628	55002.5	1.44933	12.4108	0.720159	2.06375	4.40107	0.185762	4.34175	0.986521	1098.37	43.8479	1136.86	30.1106	1211.11	14.155	1211.11	14.155	90.6918
8LQ5-61	51.5039	65180.2	1.12552	12.3596	1.9778	2.33848	2.30333	0.209622	1.18053	0.512533	1226.8	13.1881	1224.06	16.3836	1219.25	38.8852	1219.25	38.8852	100.619
8LQ5-45	238.654	307997	2.15022	12.2809	0.46405	2.36253	0.901672	0.210429	0.773091	0.857397	1231.1	8.66395	1231.35	6.43273	1231.8	9.1167	1231.8	9.1167	99.9437
8LQ5-27	97.67	13086.9	1.29177	12.1789	9.65391	2.1673	9.89279	0.191437	2.16085	0.218426	1129.16	22.382	1170.61	68.8403	1248.12	189.412	1248.12	189.412	90.4684
8LQ5-56	342.165	69517.5	1.34921	11.6776	0.449489	2.70153	3.58587	0.228804	3.55759	0.992113	1328.23	42.7033	1328.88	26.5799	1329.91	8.69807	1329.91	8.69807	99.8733
8LQ5-10	80.4977	166574	1.2555	11.6318	1.08672	2.79864	2.56617	0.236097	2.32471	0.905906	1366.38	28.6238	1355.17	19.1993	1337.52	21.0088	1337.52	21.0088	102.157
8LQ5-53	226.22	327914	1.52905	11.2234	0.461625	2.84424	1.96438	0.231519	1.90937	0.971996	1342.46	23.1396	1367.29	14.7585	1406.29	8.83923	1406.29	8.83923	95.461
8LQ5-92	450.908	648291	1.67792	11.0333	0.198461	3.1492	1.07764	0.252003	1.0592	0.982896	1448.8	13.7436	1444.81	8.30516	1438.91	3.78336	1438.91	3.78336	100.687
8LQ5-86	57.0971	128426	1.54145	10.8769	1.58591	3.2013	2.15802	0.252539	1.46353	0.678184	1451.56	19.0221	1457.47	16.6981	1466.09	30.1242	1466.09	30.1242	99.0085
8LQ5-11	40.9725	61993.1	1.25398	10.6357	1.67042	3.27279	3.63809	0.252454	3.23193	0.88836	1451.12	41.996	1474.61	28.3024	1508.56	31.5486	1508.56	31.5486	96.1923
8LQ5-58	197.519	237658	1.89301	9.91013	0.316079	4.02004	2.38946	0.288941	2.36846	0.991212	1636.23	34.2267	1638.26	19.4315	1640.84	5.86722	1640.84	5.86722	99.7193
8LQ5-68	264.763	463218	0.517012	9.87574	0.193891	4.06825	0.995705	0.291391	0.976645	0.980857	1648.48	14.2061	1647.96	8.11558	1647.29	3.59611	1647.29	3.59611	100.072
8LQ5-82	278.865	19526.6	1.95228	9.61239	0.474969	4.03805	1.82189	0.281515	1.75888	0.965419	1598.99	24.9078	1641.89	14.8283	1697.26	8.75173	1697.26	8.75173	94.2102
8LQ5-74	253.676	114822	0.523327	9.29645	0.316528	4.31559	1.82712	0.290976	1.7995	0.98488	1646.4	26.1463	1696.34	15.0632	1758.6	5.78878	1758.6	5.78878	93.6198
8LQ5-65	198.158	14460.9	1.57911	9.24214	1.24983	4.57689	3.47406	0.306791	3.24145	0.933044	1724.89	49.0572	1745.07	28.9577	1769.31	22.8261	1769.31	22.8261	97.4895
8LQ5-63	460.687	101768	0.754543	8.95951	0.214799	4.15794	5.05206	0.270185	5.04749	0.999096	1541.74	69.2157	1665.77	41.3753	1825.83	3.89596	1825.83	3.89596	84.4404
8LQ5-35	260.525	295568	2.87862	8.89148	0.163642	4.85331	1.45408	0.312976	1.44485	0.993647	1755.33	22.2022	1794.19	12.2427	1839.65	2.96308	1839.65	2.96308	95.4169
8LQ5-5	214.803	225715	0.862257	8.37343	0.265348	5.81593	1.39758	0.3532	1.37216	0.981811	1949.86	23.0879	1948.79	12.1094	1947.63	4.74308	1947.63	4.74308	100.115
8LQ5-23	266.403	341416	2.43708	6.22491	0.980844	8.18311	2.30209	0.369445	2.08269	0.904692	2026.79	36.2203	2251.48	20.8325	2462.45	16.5726	2462.45	16.5726	82.3079
8LQ5-67	298.366	499096	1.88082	6.2164	0.145234	9.49517	1.4452	0.428095	1.43788	0.994938	2297.13	27.7861	2387.08	13.2769	2464.76	2.45082	2464.76	2.45082	93.1988
8LQ5-19	57.8489	104574	0.741968	6.20876	0.340918	10.375	0.71188	0.467187	0.624938	0.87787	2471.21	12.8281	2468.82	6.59294	2466.83	5.75572	2466.83	5.75572	100.178
8LQ5-100	95.2351	179281	0.90972	6.2082	0.317667	9.47152	2.31346	0.426465	2.29155	0.990528	2289.76	44.1648	2384.79	21.2503	2466.98	5.3629	2466.98	5.3629	92.8164
Sample:	8LQ-21		N29.15252	E88.09642
8LQ21-105	860.062	7697.77	8.96647	22.3497	18.7141	0.0170484	18.9794	0.00276347	3.16231	0.166618	17.7899	0.561795	17.1648	3.23041	-69.583	460.502	17.7899	0.561795	NA
8LQ21-104	414.223	3879.21	2.30299	20.3534	13.4191	0.0189944	20.4528	0.0028039	15.4351	0.754673	18.0498	2.78211	19.1057	3.87113	154.102	315.456	18.0498	2.78211	NA
8LQ21-110	337.92	7028.82	0.350208	23.5985	22.3253	0.0366137	22.9839	0.00626652	5.46263	0.237672	40.2705	2.19297	36.5125	8.24309	-204.136	565.675	40.2705	2.19297	NA
8LQ21-60	295.7	5683.72	0.865825	23.9233	10.6624	0.0430973	10.9305	0.00747772	2.40589	0.220109	48.0251	1.15114	42.8435	4.5856	-238.532	269.802	48.0251	1.15114	NA
8LQ21-112	311.832	2741.1	1.07463	19.3595	15.1	0.0967771	15.2751	0.0135883	2.30597	0.150963	87.0059	1.99285	93.797	13.6866	270.114	347.957	87.0059	1.99285	NA
8LQ21-34	154.194	18813.8	0.998498	20.612	11.4071	0.0927737	11.988	0.0138689	3.68665	0.307527	88.7906	3.25095	90.0839	10.3345	124.46	269.335	88.7906	3.25095	NA
8LQ21-37	176.146	11484.6	1.23678	20.3346	7.86658	0.0956438	8.32451	0.0141056	2.72296	0.327101	90.2951	2.44156	92.7472	7.37876	156.309	184.385	90.2951	2.44156	NA
8LQ21-91	299.494	13372.8	0.844047	21.0341	4.63955	0.0953149	5.11359	0.0145406	2.1502	0.420488	93.0599	1.9866	92.4424	4.51836	76.5132	110.258	93.0599	1.9866	NA
8LQ21-2	182.567	5041.91	0.559898	22.718	10.9467	0.089978	11.6741	0.0148254	4.05651	0.347479	94.869	3.82019	87.4829	9.78556	-109.669	270.125	94.869	3.82019	NA
8LQ21-71	102.271	5120.91	0.803851	22.2308	26.1911	0.0930074	26.8992	0.0149958	6.13142	0.22794	95.9518	5.83964	90.301	23.2455	-56.5701	647.643	95.9518	5.83964	NA
8LQ21-4	152.565	13998.4	0.654152	22.6466	13.2571	0.0959605	13.3606	0.0157614	1.6602	0.124261	100.812	1.66066	93.0407	11.8788	-101.92	327.047	100.812	1.66066	NA
8LQ21-88	120.91	2794.89	1.2741	20.7226	27.0357	0.10661	27.2737	0.0160229	3.59461	0.131798	102.472	3.65434	102.86	26.6856	111.847	648.423	102.472	3.65434	NA
8LQ21-76	107.835	3154.39	0.723117	20.0746	12.9319	0.116981	13.8628	0.0170317	4.99433	0.360267	108.869	5.39162	112.331	14.7428	186.313	302.151	108.869	5.39162	NA
8LQ21-16	37.8371	5090.35	1.81078	-75.124	207.178	-0.0320532	207.295	0.0174642	6.95737	0.0335626	111.61	7.69827	-33.0793	-69.8107	NA	NA	111.61	7.69827	NA
8LQ21-80	917.995	13115.7	0.455447	20.2862	2.29486	0.119946	2.50552	0.0176476	1.0056	0.401354	112.772	1.12417	115.023	2.72469	161.887	53.668	112.772	1.12417	NA
8LQ21-87	190.435	5006.51	0.803989	20.8431	11.0625	0.124453	11.2482	0.0188134	2.03561	0.180972	120.152	2.42318	119.102	12.6416	98.1893	262.434	120.152	2.42318	NA
8LQ21-28	268.872	24569.4	0.87071	22.0056	6.37814	0.12413	7.12491	0.0198111	3.17548	0.445687	126.462	3.97663	118.809	7.98873	-31.8172	154.785	126.462	3.97663	NA
8LQ21-96	45.16	41282	0.606867	18.6128	37.1312	0.15324	38.2752	0.0206864	9.28798	0.242663	131.992	12.1348	144.769	51.6863	359.578	865.36	131.992	12.1348	NA
8LQ21-54	574.54	76700.6	1.56178	20.0766	2.93584	0.160967	3.01955	0.0234383	0.706074	0.233834	149.35	1.0424	151.549	4.25101	186.076	68.343	149.35	1.0424	NA
8LQ21-114	243.924	13742	0.36639	21.1005	8.32813	0.157094	9.05437	0.024041	3.55301	0.392409	153.145	5.37714	148.157	12.4825	69.0364	198.413	153.145	5.37714	NA
8LQ21-62	52.3051	7783.1	1.47845	24.9927	30.0857	0.138238	30.3865	0.0250576	4.26515	0.140363	159.541	6.72117	131.474	37.489	-350.175	791.645	159.541	6.72117	NA
8LQ21-106	209	27204	0.895777	19.9847	5.53571	0.209978	6.51693	0.0304347	3.43893	0.527692	193.268	6.54772	193.534	11.4838	196.777	128.717	193.268	6.54772	NA
8LQ21-58	338.851	16624.8	1.1276	19.7945	2.77558	0.213186	4.44652	0.0306056	3.47386	0.781253	194.338	6.65027	196.223	7.93397	218.931	64.2439	194.338	6.65027	NA
8LQ21-51	197.144	42583.6	0.808843	20.0958	6.26614	0.227045	6.69304	0.0330915	2.35208	0.351422	209.868	4.85678	207.757	12.5756	183.855	146.046	209.868	4.85678	NA
8LQ21-46	847.26	122233	2.14191	19.7441	1.16235	0.242326	1.29479	0.0347006	0.570475	0.440591	219.901	1.23332	220.324	2.56447	224.835	26.8797	219.901	1.23332	NA
8LQ21-40	178.786	39479.6	1.28051	19.685	7.12939	0.268001	7.22955	0.0382624	1.19923	0.165879	242.053	2.84896	241.094	15.5164	231.743	164.788	242.053	2.84896	NA
8LQ21-70	307.399	6965.29	2.2091	18.6672	3.89543	0.293085	7.82338	0.03968	6.7846	0.867222	250.849	16.6923	260.985	18.0068	353.033	88.0353	250.849	16.6923	NA
8LQ21-42	220.988	14196.9	0.421228	19.6879	3.65819	0.284672	4.19674	0.0406484	2.05676	0.490085	256.851	5.17895	254.357	9.44293	231.402	84.4807	256.851	5.17895	NA
8LQ21-101	285.056	62368.2	1.69258	19.3587	4.53295	0.301628	5.55063	0.0423494	3.20342	0.577128	267.379	8.3901	267.671	13.0611	270.202	103.981	267.379	8.3901	NA
8LQ21-109	99.6358	5036.43	0.643892	17.9913	4.82288	0.329263	5.72834	0.0429639	3.09092	0.539584	271.178	8.20806	289.003	14.4086	435.711	107.456	271.178	8.20806	NA
8LQ21-23	91.6706	12206.6	2.1336	19.7026	3.3809	0.304355	4.06689	0.0434914	2.26033	0.555789	274.438	6.07302	269.796	9.63584	229.68	78.1314	274.438	6.07302	NA
8LQ21-6	49.1506	11215.7	1.16162	18.8155	9.40892	0.350355	9.62017	0.0478104	2.00498	0.208414	301.065	5.8975	304.988	25.3491	335.084	213.643	301.065	5.8975	NA
8LQ21-84	26.441	5123.23	1.63438	17.2188	10.9961	0.420596	12.7275	0.0525251	6.40912	0.503563	330.006	20.6183	356.477	38.2802	532.655	241.456	330.006	20.6183	NA
8LQ21-67	241.356	40819	0.90209	18.6678	1.87811	0.421436	2.23561	0.0570589	1.21271	0.542453	357.714	4.21989	357.077	6.73034	352.963	42.4297	357.714	4.21989	NA
8LQ21-30	244.734	12660.3	1.79957	17.8687	3.41543	0.445898	3.57958	0.0577864	1.07154	0.299348	362.15	3.77359	374.403	11.2093	450.915	75.8905	362.15	3.77359	NA
8LQ21-38	263.736	62554.2	11.3424	18.1728	1.466	0.506224	1.63932	0.0667211	0.733614	0.447512	416.371	2.958	415.907	5.59436	413.311	32.7731	416.371	2.958	100.74
8LQ21-103	454.175	120771	0.813715	17.836	1.05899	0.566928	1.6304	0.0733373	1.23965	0.760338	456.23	5.46018	456.026	5.98973	454.973	23.503	456.23	5.46018	100.276
8LQ21-108	249.434	41513.4	1.73726	17.9216	1.3705	0.56992	2.74281	0.0740781	2.37586	0.866214	460.678	10.5631	457.963	10.1106	444.342	30.473	460.678	10.5631	103.677
8LQ21-9	151.568	46732.2	0.958232	17.5506	2.43588	0.590124	3.00834	0.0751163	1.76538	0.58683	466.906	7.95127	470.947	11.3367	490.687	53.7338	466.906	7.95127	95.1535
8LQ21-81	366.585	168471	5.5983	17.6764	1.02221	0.595168	1.59835	0.0763014	1.22874	0.768758	474.008	5.61536	474.163	6.05535	474.909	22.6219	474.008	5.61536	99.8104
8LQ21-74	39.6619	13918.7	1.90594	17.6503	7.86353	0.615785	8.1444	0.0788278	2.1204	0.26035	489.122	9.98764	487.202	31.5264	478.162	174.042	489.122	9.98764	102.292
8LQ21-57	515.64	29552.1	2.78772	15.6901	1.12474	0.69802	7.7113	0.0794316	7.62884	0.989306	492.729	36.1892	537.607	32.1979	732.845	23.8235	492.729	36.1892	67.2351
8LQ21-2	267.418	54290.1	1.54916	16.3162	1.99045	0.697965	4.44642	0.0825948	3.97602	0.894208	511.592	19.5549	537.575	18.5607	649.394	42.7558	511.592	19.5549	78.78
8LQ21-93	204.508	38058.9	0.465347	17.4125	1.57192	0.655965	2.01153	0.0828404	1.25512	0.623963	513.054	6.18986	512.143	8.09087	508.1	34.5494	513.054	6.18986	100.975
8LQ21-89	118.027	27583.3	0.351365	16.9628	2.81589	0.678192	4.1736	0.0834351	3.08053	0.7381	516.594	15.2929	525.681	17.1275	565.326	61.3334	516.594	15.2929	91.3797
8LQ21-1	63.8753	42782	0.736694	17.5963	5.88758	0.65653	6.68448	0.0837866	3.16523	0.473519	518.685	15.7745	512.49	26.9063	484.969	130.087	518.685	15.7745	106.952
8LQ21-48	224.771	50500	1.13633	17.1114	2.21476	0.691146	2.55518	0.0857739	1.27427	0.4987	530.495	6.48924	533.489	10.6036	546.293	48.4081	530.495	6.48924	97.1081
8LQ21-92	62.5743	21337.7	1.04283	17.2706	5.69912	0.697974	6.10758	0.087427	2.19606	0.359562	540.302	11.3817	537.58	25.4976	526.07	125.041	540.302	11.3817	102.705
8LQ21-69	72.3282	26306.8	4.68472	17.1742	4.77834	0.718182	5.31183	0.0894562	2.32012	0.436783	552.32	12.2809	549.593	22.5481	538.321	104.612	552.32	12.2809	102.6
8LQ21-111	75.4282	5420.12	0.886755	13.9997	2.52572	0.89598	6.68218	0.0909736	6.18646	0.925814	561.293	33.2557	649.577	32.0743	969.755	51.5195	561.293	33.2557	57.8798
8LQ21-32	57.4055	20341	0.471881	16.5319	6.04032	0.787577	6.53438	0.0944307	2.49252	0.381447	581.688	13.8638	589.796	29.2403	621.102	130.42	581.688	13.8638	93.6542
8LQ21-90	76.9316	88332.4	1.548	16.7324	4.91357	0.779186	5.18355	0.094558	1.65105	0.318518	582.438	9.19473	585.019	23.0543	595.057	106.541	582.438	9.19473	97.8794
8LQ21-12	240.645	104163	3.17291	16.8425	1.83601	0.789353	2.69128	0.096422	1.96776	0.731159	593.407	11.1555	590.805	12.0555	580.845	39.8684	593.407	11.1555	102.163
8LQ21-49	121.218	5797.24	0.470705	15.849	10.3907	0.855411	14.2099	0.0983273	9.69308	0.682134	604.599	55.9414	627.615	66.6162	711.452	221.409	604.599	55.9414	84.981
8LQ21-44	76.5825	47215.3	0.921627	16.0353	3.10485	0.885923	4.29394	0.103032	2.96611	0.690766	632.151	17.8603	644.177	20.4841	686.585	66.2782	632.151	17.8603	92.0718
8LQ21-7	123.594	48111.3	4.15131	16.2157	1.23506	0.906986	1.9563	0.106668	1.51715	0.77552	653.371	9.42681	655.454	9.44779	662.611	26.4623	653.371	9.42681	98.6054
8LQ21-77	388.126	30104.8	4.39625	15.6308	0.94237	0.972161	1.63707	0.11021	1.33864	0.817702	673.965	8.56636	689.577	8.19415	740.819	19.9351	673.965	8.56636	90.9758
8LQ21-78	118.253	5913.82	0.558187	15.1303	2.0837	1.06883	4.13384	0.117289	3.57027	0.86367	714.939	24.1608	738.167	21.6887	809.286	43.6182	714.939	24.1608	88.342
8LQ21-97	155.211	103528	0.51499	15.6596	1.31232	1.05306	1.8036	0.119601	1.23725	0.685989	728.264	8.52014	730.398	9.39366	736.972	27.779	728.264	8.52014	98.8185
8LQ21-11	92.5458	18138.6	1.22375	14.6036	3.29925	1.17477	4.68939	0.124426	3.33246	0.710639	755.987	23.772	788.874	25.7264	883.029	68.2402	755.987	23.772	85.6129
8LQ21-5	106.018	63502.9	1.43893	14.3867	1.30694	1.33556	2.45088	0.139355	2.07333	0.845955	841.014	16.3475	861.3	14.2315	913.855	26.9157	841.014	16.3475	92.0293
8LQ21-43	37.7799	54545.1	0.824378	14.3854	3.61788	1.51764	4.15115	0.158339	2.03543	0.490329	947.542	17.9361	937.525	25.4135	914.039	74.4753	914.039	74.4753	103.665
8LQ21-47	172.326	100564	1.84752	14.3193	0.74215	1.4111	2.99614	0.146547	2.90277	0.968836	881.577	23.9176	893.62	17.8065	923.555	15.2505	923.555	15.2505	95.4547
8LQ21-39	158.486	16100.1	1.16643	13.7624	2.58351	1.54455	3.02697	0.154169	1.57735	0.521099	924.29	13.5823	948.321	18.6586	1004.51	52.4471	1004.51	52.4471	92.0142
8LQ21-75	236.698	101409	0.811916	13.7474	1.29687	1.65473	1.76789	0.164986	1.20148	0.679613	984.426	10.9689	991.362	11.1895	1006.72	26.3119	1006.72	26.3119	97.7852
8LQ21-18	142.236	132501	1.15715	13.4504	0.928758	1.77661	1.48753	0.173311	1.16196	0.781134	1030.33	11.0642	1036.94	9.66462	1050.93	18.7361	1050.93	18.7361	98.0395
8LQ21-20	157.515	67998.8	3.11639	13.194	0.841102	1.90305	2.27595	0.182107	2.11483	0.929207	1078.48	21.0022	1082.16	15.1503	1089.59	16.8448	1089.59	16.8448	98.9796
8LQ21-63	202.045	166634	2.80959	13.1903	0.450883	1.97445	1.21157	0.188885	1.12455	0.928174	1115.33	11.5175	1106.83	8.16636	1090.17	9.0395	1090.17	9.0395	102.308
8LQ21-29	123.971	28794.1	0.653261	13.1578	1.03535	1.91424	1.42817	0.182674	0.983732	0.688804	1081.57	9.79505	1086.06	9.52565	1095.11	20.7281	1095.11	20.7281	98.7632
8LQ21-95	204.102	268012	2.18239	13.1301	0.636774	1.92854	1.44873	0.183652	1.30128	0.898223	1086.9	13.0156	1091.03	9.68741	1099.27	12.7302	1099.27	12.7302	98.8741
8LQ21-59	372.224	355815	2.92832	13.1243	0.343043	1.93781	0.666396	0.184453	0.571319	0.857326	1091.25	5.73541	1094.24	4.46327	1100.21	6.87404	1100.21	6.87404	99.1859
8LQ21-85	76.3383	60176	1.79937	13.1169	1.56823	1.95998	2.40693	0.186458	1.82592	0.758608	1102.16	18.4981	1101.88	16.1842	1101.3	31.3643	1101.3	31.3643	100.078
8LQ21-35	252.629	164783	0.94321	13.096	0.488425	1.90572	2.35938	0.181007	2.30827	0.978338	1072.47	22.806	1083.09	15.7133	1104.49	9.74616	1104.49	9.74616	97.1007
8LQ21-41	45.3277	38579.5	0.700178	13.0702	1.95714	1.97412	3.57356	0.187136	2.98997	0.836692	1105.84	30.3839	1106.72	24.0895	1108.42	39.094	1108.42	39.094	99.767
8LQ21-27	17.6298	13887.2	0.893418	13.0501	5.50919	2.06191	6.39985	0.195157	3.25684	0.508893	1149.25	34.2829	1136.25	43.7871	1111.5	110.104	1111.5	110.104	103.396
8LQ21-86	96.8262	130420	1.25823	12.9919	1.56885	2.05323	3.68864	0.193468	3.33838	0.905044	1140.13	34.8865	1133.37	25.1921	1120.46	31.282	1120.46	31.282	101.756
8LQ21-10	173.952	181342	2.13495	12.9704	0.84235	2.01415	3.02852	0.189471	2.90902	0.960541	1118.51	29.8715	1120.29	20.5516	1123.74	16.7918	1123.74	16.7918	99.5342
8LQ21-52	264.816	266788	1.47198	12.8616	0.436932	2.12236	2.77572	0.197977	2.74112	0.987533	1164.44	29.2021	1156.11	19.1599	1140.53	8.69951	1140.53	8.69951	102.096
8LQ21-61	92.4007	103652	0.655152	12.7696	0.84592	2.1073	1.50471	0.195165	1.24442	0.827015	1149.29	13.0997	1151.2	10.362	1154.76	16.786	1154.76	16.786	99.5265
8LQ21-64	48.3095	52605.9	0.641639	12.7588	2.1619	2.18552	2.65597	0.202239	1.54284	0.580895	1187.34	16.7307	1176.44	18.5044	1156.43	42.8956	1156.43	42.8956	102.672
8LQ21-99	81.3217	63015.8	0.990237	12.7474	1.44512	2.05898	1.96428	0.190359	1.33043	0.67731	1123.32	13.7153	1135.28	13.4256	1158.21	28.6833	1158.21	28.6833	96.9878
8LQ21-102	127.602	27334.7	0.753914	12.6892	1.07395	2.1425	3.8014	0.197176	3.64654	0.959263	1160.13	38.7169	1162.63	26.3218	1167.28	21.273	1167.28	21.273	99.388
8LQ21-13	24.8651	32530.4	0.92742	12.6614	3.54603	2.07119	3.92694	0.190195	1.68716	0.429639	1122.43	17.3804	1139.33	26.8967	1171.66	70.1974	1171.66	70.1974	95.7987
8LQ21-107	146.049	20305.1	0.926358	12.6426	0.990932	1.80675	8.31386	0.165666	8.25459	0.992871	988.188	75.6299	1047.9	54.3929	1174.6	19.6097	1174.6	19.6097	84.1301
8LQ21-26	85.788	120813	1.21677	12.6126	1.48479	2.20176	1.67193	0.201407	0.768603	0.45971	1182.88	8.30625	1181.6	11.6748	1179.29	29.3656	1179.29	29.3656	100.304
8LQ21-73	77.1866	74949.8	0.870434	12.5824	1.01929	2.22565	1.8714	0.203105	1.56946	0.838653	1191.98	17.0799	1189.15	13.1118	1184.03	20.1405	1184.03	20.1405	100.671
8LQ21-100	75.7295	155779	0.872747	12.572	1.40983	2.25135	1.94692	0.20528	1.34271	0.689659	1203.62	14.7421	1197.21	13.6893	1185.67	27.8627	1185.67	27.8627	101.514
8LQ21-33	74.4824	69799.4	0.494117	12.4156	0.975245	2.25447	1.37894	0.203007	0.974868	0.70697	1191.45	10.6049	1198.18	9.69956	1210.35	19.2153	1210.35	19.2153	98.4386
8LQ21-65	89.4918	166316	1.14354	12.2759	0.902009	2.35342	1.58864	0.209533	1.30773	0.823175	1226.33	14.604	1228.59	11.321	1232.59	17.7057	1232.59	17.7057	99.4924
8LQ21-21	53.8164	25208.9	0.991677	11.4561	2.32588	2.73945	2.60832	0.227613	1.18052	0.452597	1321.98	14.11	1339.23	19.4043	1366.89	44.7851	1366.89	44.7851	96.7144
8LQ21-53	144.585	217293	1.37533	10.6056	0.510567	3.45668	1.01488	0.265884	0.877101	0.86424	1519.87	11.8759	1517.39	7.99285	1513.91	9.63432	1513.91	9.63432	100.394
8LQ21-45	133.325	265761	1.35317	9.44643	0.38663	4.54681	1.17305	0.311511	1.1075	0.944123	1748.14	16.9577	1739.58	9.7639	1729.29	7.09673	1729.29	7.09673	101.09
8LQ21-8	78.1165	63251.3	1.80411	9.41226	0.834176	4.5446	2.05753	0.310233	1.88085	0.914128	1741.85	28.7088	1739.17	17.1255	1735.93	15.2974	1735.93	15.2974	100.341
8LQ21-68	77.8953	118199	1.0444	8.8761	0.506697	5.23373	1.43288	0.336924	1.3403	0.935389	1871.86	21.7744	1858.12	12.2159	1842.78	9.17138	1842.78	9.17138	101.578
8LQ21-98	126.133	24983.5	1.98197	8.80483	2.18722	4.76917	7.89131	0.304553	7.58214	0.960821	1713.85	114.119	1779.49	66.3324	1857.35	39.5206	1857.35	39.5206	92.2735
8LQ21-94	220.581	455420	1.54608	8.74658	0.212602	5.25751	0.608284	0.333516	0.569921	0.936933	1855.4	9.18866	1861.99	5.18942	1869.34	3.83583	1869.34	3.83583	99.2544
8LQ21-3	505.6	611827	6.05337	8.65624	0.0813821	5.45593	2.54394	0.342528	2.54263	0.999488	1898.82	41.8197	1893.69	21.833	1888.05	1.46501	1888.05	1.46501	100.57
8LQ21-66	172.659	102480	2.37719	6.60967	1.08552	7.72959	4.84268	0.37054	4.71945	0.974553	2031.94	82.2576	2200.05	43.5657	2360.58	18.5342	2360.58	18.5342	86.0778
8LQ21-50	128.489	611.077	1.33471	6.30147	5.6692	9.01119	8.35433	0.411834	6.13638	0.734514	2223.3	115.403	2339.14	76.4995	2441.77	96.0755	2441.77	96.0755	91.0529
8LQ21-82	153.347	350562	1.61642	6.02548	0.147933	11.3891	2.74771	0.497713	2.74372	0.99855	2603.96	58.7788	2555.53	25.6533	2517.31	2.48625	2517.31	2.48625	103.442
8LQ21-15	44.1942	297830	1.11524	5.94553	0.64954	11.1003	2.02703	0.478656	1.92014	0.947269	2521.41	40.0694	2531.58	18.8833	2539.73	10.8922	2539.73	10.8922	99.2784
8LQ21-83	67.0675	148065	0.826605	5.60417	0.332322	12.4383	1.26746	0.505556	1.22312	0.965015	2637.63	26.4766	2638.07	11.9124	2638.4	5.51649	2638.4	5.51649	99.9708
8LQ21-79	159.972	154647	1.13023	4.94653	0.132413	14.9214	1.28719	0.535314	1.28037	0.994695	2763.8	28.7784	2810.24	12.2496	2843.72	2.15808	2843.72	2.15808	97.1898
8LQ21-56	126.973	195355	10.2485	4.21209	0.3206	18.4732	2.91143	0.564338	2.89373	0.993919	2884.53	67.2977	3014.71	28.0512	3102.69	5.10613	3102.69	5.10613	92.9688
8LQ21-22	146.54	304337	4.73397	3.77496	0.131722	23.9934	1.05698	0.656905	1.04874	0.992204	3255.13	26.8037	3268.12	10.3034	3276.09	2.06574	3276.09	2.06574	99.36
Sample:	8LQ-21a		N29.15252	E88.09642
LEARY-8LQ21-1	438.883	9256.53	1.09842	22.266	5.83189	0.0935233	6.29346	0.0151029	2.36575	0.375905	96.6316	2.26901	90.7802	5.46532	-60.4233	142.284	96.6316	2.26901	NA
LEARY-8LQ21-5	122.934	25908.4	1.0365	18.0621	10.8622	0.259884	11.2979	0.0340445	3.10711	0.275017	215.812	6.5945	234.573	23.6675	426.949	242.849	215.812	6.5945	NA
LEARY-8LQ21-6	116.343	102598	0.503338	9.85111	0.506413	4.04795	1.23466	0.289214	1.12603	0.912012	1637.6	16.2841	1643.89	10.0534	1651.92	9.38696	1651.92	9.38696	99.1331
LEARY-8LQ21-7	126.648	7470.96	0.86533	21.0654	22.4974	0.116522	23.4554	0.0178023	6.63476	0.282868	113.752	7.48096	111.914	24.86	72.9998	540.75	113.752	7.48096	NA
LEARY-8LQ21-8	129.45	9547.16	1.15452	20.2379	17.7659	0.238579	18.0094	0.0350185	2.9514	0.163881	221.881	6.43719	217.256	35.2381	167.412	417.866	221.881	6.43719	NA
LEARY-8LQ21-9	198.509	25279.6	1.66157	18.8897	3.75742	0.361409	4.37481	0.0495133	2.2407	0.512183	311.533	6.81454	313.266	11.7929	326.188	85.3078	311.533	6.81454	NA
LEARY-8LQ21-10	175.32	44108.8	0.308568	17.388	2.6671	0.657764	3.34194	0.0829506	2.01374	0.602566	513.711	9.94335	513.245	13.4649	511.153	58.6369	513.711	9.94335	100.5
LEARY-8LQ21-11	357.053	400915	1.76836	9.19675	0.235996	4.8589	1.27756	0.324094	1.25558	0.982791	1809.69	19.8114	1795.16	10.7585	1778.3	4.30363	1778.3	4.30363	101.765
LEARY-8LQ21-12	253.244	165890	3.1714	13.0713	0.967285	1.96154	1.21494	0.185958	0.735153	0.605092	1099.44	7.43089	1102.41	8.171	1108.26	19.3268	1108.26	19.3268	99.2041
LEARY-8LQ21-13	42.0821	21016.6	0.7389	18.747	11.1335	0.666855	11.4826	0.0906697	2.80993	0.244712	559.497	15.0586	518.798	46.6777	343.375	252.64	559.497	15.0586	162.941
LEARY-8LQ21-14	71.8031	13033	2.13288	19.1711	9.80636	0.275445	10.2768	0.0382984	3.07362	0.299084	242.277	7.30848	247.038	22.5388	292.508	224.406	242.277	7.30848	NA
LEARY-8LQ21-18	188.558	13062.3	0.769351	21.2818	13.5047	0.136265	13.7784	0.0210325	2.73241	0.198311	134.178	3.6284	129.711	16.7792	48.6616	323.77	134.178	3.6284	NA
LEARY-8LQ21-19	253.407	14324.7	1.08301	19.3959	4.41551	0.315555	4.5828	0.0443898	1.22691	0.26772	279.986	3.36163	278.478	11.1621	265.85	101.365	279.986	3.36163	NA
LEARY-8LQ21-20	414.634	15221.6	0.964203	19.2809	7.04464	0.090479	9.71621	0.0126524	6.69161	0.688706	81.0512	5.38969	87.9495	8.1859	279.472	161.408	81.0512	5.38969	NA
LEARY-8LQ21-21	110.761	130773	1.4165	11.9914	1.61338	2.58815	2.44878	0.22509	1.84215	0.752273	1308.72	21.8189	1297.29	17.9367	1278.42	31.4338	1278.42	31.4338	102.37
LEARY-8LQ21-22	145.097	9298.44	0.848308	19.2876	12.9104	0.0945042	13.7906	0.0132199	4.84804	0.351545	84.6627	4.07764	91.6906	12.0912	278.676	296.642	84.6627	4.07764	NA
LEARY-8LQ21-23	531.947	137687	2.84664	17.1785	1.31033	0.67261	1.63703	0.0838005	0.981275	0.599425	518.768	4.89109	522.298	6.68437	537.761	28.6802	518.768	4.89109	96.468
LEARY-8LQ21-24	165.819	3897.69	0.996788	15.8855	11.68	0.144847	12.0339	0.0166881	2.89701	0.240738	106.691	3.06541	137.352	15.4608	706.572	249.258	106.691	3.06541	NA
LEARY-8LQ21-25	369.4	46935.2	1.70713	19.3679	4.19092	0.244684	4.30286	0.0343705	0.975101	0.226617	217.844	2.08871	222.249	8.58903	269.122	96.1478	217.844	2.08871	NA
LEARY-8LQ21-26	147.736	57596.4	1.74564	17.5628	3.72099	0.642611	4.01893	0.0818541	1.51856	0.377852	507.18	7.40666	503.921	15.9657	489.155	82.1196	507.18	7.40666	103.685
LEARY-8LQ21-27	441.213	161899	1.25236	4.48617	0.771996	16.7848	1.8529	0.546124	1.68442	0.909071	2809.03	38.3549	2922.62	17.758	3001.8	12.4103	3001.8	12.4103	93.5783
LEARY-8LQ21-28	396.136	361029	14.792	14.8907	0.886837	1.17345	2.26296	0.126729	2.08195	0.920011	769.18	15.0955	788.258	12.4063	842.64	18.437	769.18	15.0955	91.2821
LEARY-8LQ21-29	200.052	63833.4	0.365442	20.1458	10.4073	0.220874	10.4825	0.0322721	1.25406	0.119634	204.753	2.52738	202.637	19.2585	178.066	243.198	204.753	2.52738	NA
LEARY-8LQ21-30	149.661	72582.9	0.914272	13.1232	1.14436	1.90673	1.41112	0.18148	0.825652	0.585104	1075.05	8.17555	1083.44	9.39921	1100.34	22.8827	1100.34	22.8827	97.7022
LEARY-8LQ21-31	56.5715	44787.2	0.68623	12.7096	2.07842	2.22808	2.63707	0.205382	1.62305	0.615475	1204.17	17.8274	1189.91	18.4835	1164.09	41.1774	1164.09	41.1774	103.442
LEARY-8LQ21-32	123.68	99827.6	1.25375	10.9545	1.16676	3.18226	1.45551	0.25283	0.870164	0.597841	1453.05	11.3202	1452.86	11.2457	1452.57	22.2023	1452.57	22.2023	100.033
LEARY-8LQ21-33	214.94	85094.2	2.32478	17.8258	4.82392	0.328745	6.64985	0.0425017	4.57715	0.688309	268.321	12.0294	288.607	16.707	456.269	107.086	268.321	12.0294	NA
LEARY-8LQ21-34	488.937	143661	7.04166	18.0833	1.15308	0.495122	2.38753	0.0649365	2.09063	0.875643	405.577	8.21788	408.395	8.0283	424.336	25.7274	405.577	8.21788	95.5793
LEARY-8LQ21-37	203.121	246080	2.50067	8.89414	0.336713	4.89824	1.35363	0.315967	1.31109	0.968568	1770.01	20.2931	1801.95	11.4148	1839.1	6.09732	1839.1	6.09732	96.2428
LEARY-8LQ21-38	102.681	11630.8	0.679312	12.7968	2.34911	2.06309	3.96778	0.191478	3.19765	0.805903	1129.37	33.1272	1136.64	27.1418	1150.54	46.6593	1150.54	46.6593	98.16
LEARY-8LQ21-39	236.845	312445	3.0285	6.25992	0.452649	10.2653	1.77065	0.466059	1.71182	0.966772	2466.26	35.0808	2458.99	16.3844	2452.97	7.65647	2452.97	7.65647	100.542
LEARY-8LQ21-40	101.689	286286	1.08088	8.80215	0.734158	5.22097	1.0374	0.333303	0.732944	0.706522	1854.37	11.8114	1856.05	8.84055	1857.91	13.2624	1857.91	13.2624	99.8097
LEARY-8LQ21-41	53.2498	13457.1	1.15433	18.5532	10.7058	0.426887	11.1853	0.0574422	3.23992	0.289658	360.051	11.3456	360.964	33.991	366.81	241.889	360.051	11.3456	NA
LEARY-8LQ21-42	203.797	246385	1.37785	12.4434	0.890504	2.32071	1.1262	0.20944	0.689439	0.612182	1225.83	7.69642	1218.64	7.99178	1205.91	17.5222	1205.91	17.5222	101.652
LEARY-8LQ21-43	406.408	33755.9	5.20649	17.587	1.90725	0.494329	5.17199	0.0630532	4.80748	0.929522	394.167	18.3819	407.856	17.374	486.09	42.1239	394.167	18.3819	NA
LEARY-8LQ21-44	255.221	150132	0.70177	13.9608	0.9095	1.63673	1.16078	0.165724	0.721268	0.621363	988.508	6.61005	984.454	7.31644	975.427	18.5598	975.427	18.5598	101.341
LEARY-8LQ21-45	141.498	113682	2.69573	13.9906	1.29305	1.60037	1.53	0.162388	0.817889	0.534567	970.037	7.36575	970.356	9.56139	971.087	26.3578	971.087	26.3578	99.8918
LEARY-8LQ21-47	209.528	52815.3	1.36892	14.9645	2.6927	1.24746	3.04511	0.13539	1.42198	0.466973	818.54	10.9309	822.258	17.1636	832.344	56.1461	818.54	10.9309	98.3416
LEARY-8LQ21-48	247.7	10256.5	1.792	20.7924	12.0688	0.227813	12.2427	0.0343544	2.05661	0.167986	217.743	4.40335	208.392	23.069	103.939	286.144	217.743	4.40335	NA
LEARY-8LQ21-51	238.098	15841.2	1.73169	17.2187	14.5001	0.356075	16.3703	0.0444671	7.59809	0.46414	280.463	20.853	309.28	43.6727	532.672	319.051	280.463	20.853	NA
LEARY-8LQ-51	594.636	2993.85	0.637268	19.9645	10.1156	0.1064	11.5053	0.0154062	5.48137	0.476423	98.5577	5.36122	102.667	11.235	199.143	235.443	98.5577	5.36122	NA
LEARY-8LQ-52	485.161	110995	1.57218	13.1308	0.89088	1.98324	1.53226	0.188871	1.24666	0.813607	1115.26	12.7672	1109.83	10.3434	1099.19	17.8365	1099.19	17.8365	101.461
LEARY-8LQ-53	205.482	16043.8	1.65222	21.4008	15.4606	0.141587	15.6624	0.0219763	2.50602	0.160002	140.134	3.47388	134.457	19.7269	35.2806	372.048	140.134	3.47388	NA
LEARY-8LQ-54	88.7986	41875.2	1.48045	14.4995	3.12595	1.4264	5.93291	0.15	5.04261	0.849938	900.965	42.4008	900.043	35.4285	897.762	64.5142	900.965	42.4008	100.357
LEARY-8LQ-55	297.948	18576.6	2.21546	20.0505	8.29867	0.239485	8.50371	0.0348258	1.85614	0.218274	220.681	4.02683	217.999	16.6846	189.11	193.372	220.681	4.02683	NA
LEARY-8LQ-57	125.715	26200.8	0.960144	17.21	8.27922	0.679033	8.6681	0.0847558	2.56718	0.296164	524.447	12.9304	526.19	35.6093	533.764	181.549	524.447	12.9304	98.2544
LEARY-8LQ-58	683.159	20105.8	1.48996	20.3488	6.29622	0.0988227	6.6043	0.0145846	1.9936	0.301864	93.3392	1.8474	95.689	6.03102	154.684	147.579	93.3392	1.8474	NA
LEARY-8LQ-59	541.541	43889.1	0.706814	19.0467	8.71808	0.141717	9.28236	0.0195768	3.18705	0.343345	124.981	3.94484	134.572	11.6996	307.359	198.908	124.981	3.94484	NA
LEARY-8LQ-60	176.113	15036.9	1.30563	22.7845	20.8665	0.113911	21.3624	0.0188236	4.5761	0.214213	120.217	5.45025	109.536	22.1851	-116.863	519.106	120.217	5.45025	NA
LEARY-8LQ-61	183.823	6006.09	0.465186	21.1814	45.263	0.0862471	45.4731	0.0132494	4.36644	0.0960224	84.8504	3.68067	84.0014	36.6766	59.9069	1131.63	84.8504	3.68067	NA
LEARY-8LQ-62	62.5189	35779.2	1.34617	12.6141	2.57208	2.16191	4.15488	0.197784	3.26304	0.785351	1163.41	34.7343	1168.88	28.8532	1179.06	50.8681	1179.06	50.8681	98.672
LEARY-8LQ-63	72.7719	3207.39	0.80444	25.9625	52.83	0.107293	53.4977	0.0202031	8.42543	0.157491	128.939	10.7558	103.486	52.6823	-449.463	1483.86	128.939	10.7558	NA
LEARY-8LQ-64	204.352	22210.3	1.52025	18.8919	16.6051	0.18072	16.9722	0.0247617	3.51126	0.206883	157.68	5.4694	168.68	26.3831	325.921	379.232	157.68	5.4694	NA
LEARY-8LQ-66	255.204	8811.17	1.09801	21.3167	13.2049	0.0874377	13.3817	0.0135181	2.16817	0.162025	86.5597	1.86422	85.1137	10.9258	44.7429	316.758	86.5597	1.86422	NA
LEARY-8LQ-68	40.6939	45570.1	1.32766	5.02323	0.822207	15.1284	2.23042	0.551158	2.07334	0.929575	2829.99	47.4915	2823.36	21.2462	2818.62	13.4304	2818.62	13.4304	100.403
LEARY-8LQ-70	256.28	117550	1.64011	11.906	0.835896	2.59188	1.79293	0.22381	1.58615	0.88467	1301.98	18.6995	1298.35	13.1374	1292.33	16.2621	1292.33	16.2621	100.746
LEARY-8LQ-71	387.114	78280.2	1.08369	18.9233	2.72837	0.409027	2.86717	0.0561368	0.881304	0.307378	352.089	3.01976	348.174	8.45135	322.162	61.9666	352.089	3.01976	NA
LEARY-8LQ-72	1558.86	133380	2.18028	20.3751	1.97477	0.165879	2.4834	0.0245126	1.50583	0.606361	156.113	2.32256	155.836	3.5877	151.654	46.2724	156.113	2.32256	NA
LEARY-8LQ-73	265.107	71295.2	0.740025	12.7658	1.14396	2.06209	4.56392	0.190922	4.41823	0.968077	1126.37	45.661	1136.31	31.2172	1155.34	22.7107	1155.34	22.7107	97.4922
LEARY-8LQ-76	286.334	117792	3.15608	14.6267	1.22098	1.37712	1.72357	0.146089	1.21651	0.705808	879.003	9.99617	879.212	10.139	879.735	25.2549	879.003	9.99617	99.9168
LEARY-8LQ-77	201.6	65091.6	7.36193	14.6743	2.15752	1.37182	2.55844	0.146	1.37504	0.537453	878.502	11.2928	876.942	15.0263	872.984	44.7075	878.502	11.2928	100.632
LEARY-8LQ-78	60.4269	3257.99	1.19086	14.867	21.6715	0.234491	22.8073	0.0252841	7.1074	0.311629	160.965	11.2988	213.899	44.0162	845.954	455.832	160.965	11.2988	NA
LEARY-8LQ-79	168.264	10324.5	1.20352	23.0103	16.1279	0.159358	16.3084	0.0265946	2.4196	0.148365	169.2	4.0407	150.141	22.7651	-141.23	401.637	169.2	4.0407	NA
LEARY-8LQ-80	312.713	21975.4	1.04863	19.9862	8.1167	0.195189	8.6217	0.0282933	2.90739	0.337217	179.858	5.15689	181.047	14.2978	196.619	188.866	179.858	5.15689	NA
LEARY-8LQ-81	369.775	38262	1.29088	19.5421	3.54647	0.332021	3.91	0.0470583	1.6464	0.421074	296.436	4.77001	291.108	9.89634	248.574	81.6781	296.436	4.77001	NA
LEARY-8LQ-82	141.867	19771.2	1.54286	18.2398	9.70479	0.294365	9.88941	0.0389407	1.90196	0.192323	246.264	4.5955	261.989	22.8404	405.084	217.683	246.264	4.5955	NA
LEARY-8LQ-83	317.802	15202.7	1.00802	21.2122	9.66962	0.112615	10.139	0.0173254	3.04925	0.300744	110.73	3.3476	108.355	10.4206	56.4731	231.054	110.73	3.3476	NA
LEARY-8LQ-84	227.266	14448.9	0.581219	14.5308	1.89691	1.2412	4.96691	0.130807	4.59042	0.9242	792.466	34.2307	819.427	27.9375	893.338	39.1797	792.466	34.2307	88.7084
LEARY-8LQ-85	371.782	112685	4.63193	15.9247	1.42281	0.916914	3.74536	0.105901	3.46458	0.925033	648.898	21.3872	660.727	18.1927	701.33	30.3143	648.898	21.3872	92.5239
LEARY-8LQ-87	322.982	22960	0.816806	6.00808	1.23872	8.56081	4.39381	0.373035	4.21558	0.959437	2043.66	73.8351	2292.4	39.9683	2522.17	20.8063	2522.17	20.8063	81.0281
LEARY-8LQ-88	252.518	104731	0.739593	14.1234	1.24778	1.52996	2.75014	0.156717	2.45078	0.891146	938.508	21.4049	942.481	16.8885	951.795	25.5105	951.795	25.5105	98.604
LEARY-8LQ-90	282.575	84280.2	2.29178	16.3654	1.55186	0.915906	2.1589	0.108712	1.50087	0.695199	665.261	9.48675	660.193	10.4798	642.938	33.3817	665.261	9.48675	103.472
LEARY-8LQ-91	513.582	533418	7.07613	9.69817	1.63561	3.72922	4.10519	0.262305	3.76529	0.917202	1501.63	50.4392	1577.66	32.8809	1680.87	30.2047	1680.87	30.2047	89.3363
LEARY-8LQ-92	143.245	69478.7	2.67691	13.382	2.0022	1.86044	2.34604	0.180566	1.22274	0.521193	1070.06	12.0558	1067.14	15.4947	1061.19	40.3099	1061.19	40.3099	100.836
LEARY-8LQ-94	73.4573	35471.2	2.18449	17.066	13.9792	0.679093	14.3557	0.0840544	3.26611	0.227514	520.277	16.3252	526.226	59.0196	552.096	306.461	520.277	16.3252	94.2367
LEARY-8LQ-95	244.507	79841.6	3.53749	17.3928	1.99963	0.63446	2.40334	0.0800336	1.33324	0.554745	496.323	6.36887	498.87	9.47302	510.552	43.9395	496.323	6.36887	97.2132
LEARY-8LQ-96	244.715	63195.7	1.98291	9.27188	0.633884	4.4303	1.05669	0.29792	0.845448	0.800092	1680.99	12.51	1718.02	8.75381	1763.44	11.5858	1763.44	11.5858	95.3241
LEARY-8LQ-97	96.9665	34963.7	1.39536	13.7702	2.59449	1.69146	2.90585	0.168928	1.30865	0.450352	1006.2	12.1915	1005.31	18.5449	1003.36	52.6756	1003.36	52.6756	100.284
LEARY-8LQ-98	64.3764	2819.78	1.32486	17.1163	20.2455	0.203026	21.1536	0.0252035	6.13124	0.289844	160.459	9.71668	187.683	36.2639	545.667	446.504	160.459	9.71668	NA
LEARY-8LQ-99	127.581	7099.35	1.45801	23.1953	30.4604	0.089824	31.1678	0.015111	6.60303	0.211854	96.6829	6.33636	87.3394	26.0897	-161.112	772.612	96.6829	6.33636	NA
LEARY-8LQ-100	131.617	112472	1.53733	12.7596	2.6495	2.15738	2.79422	0.199647	0.887602	0.317656	1173.43	9.5224	1167.43	19.3885	1156.3	52.568	1156.3	52.568	101.481
Sample:	9LQ-500		N29.10226	E88.95357
62	201.314	1964.83	1.2063	16.0176	4.85832	0.0908936	8.138	0.0105592	6.5287	0.802248	67.7118	4.39756	88.3355	6.88502	688.929	103.688	67.7118	4.39756	NA
288	156.131	841.406	0.633283	15.9686	5.64612	0.109499	11.0707	0.0126816	9.52269	0.860171	81.2371	7.68742	105.507	11.0944	695.443	120.411	81.2371	7.68742	NA
88	196.432	1509	1.45591	14.8758	4.40353	0.125657	10.6592	0.013557	9.7071	0.910677	86.8071	8.36998	120.187	12.0824	844.7	91.6548	86.8071	8.36998	NA
213	220.801	8935.01	0.836075	15.3103	4.1365	0.136733	5.9974	0.0151829	4.3426	0.724081	97.1399	4.18677	130.13	7.32512	784.493	86.9317	97.1399	4.18677	NA
287	128.77	222.4	0.938444	110.634	101.198	0.0207173	101.347	0.0166234	5.49536	0.0542229	106.28	5.79259	20.821	20.8896	0	0	106.28	5.79259	NA
269	335.699	1180.43	0.630021	19.4058	6.53385	0.121664	7.49287	0.0171235	3.66768	0.48949	109.451	3.98043	116.58	8.25253	264.658	150.079	109.451	3.98043	NA
296	267.335	3555.03	0.684322	18.7936	4.11521	0.130444	7.01263	0.01778	5.6782	0.809711	113.61	6.39451	124.496	8.21663	337.718	93.246	113.61	6.39451	NA
55	419.611	4069.39	0.660752	19.1036	2.77423	0.128686	3.30976	0.0178298	1.80503	0.545367	113.925	2.03833	122.917	3.83166	300.584	63.2605	113.925	2.03833	NA
76	581.765	3445.68	1.87142	21.1633	2.60131	0.119502	4.19789	0.0183424	3.29476	0.784861	117.172	3.82565	114.621	4.55003	61.9635	61.9618	117.172	3.82565	NA
244	550.175	9876.91	0.887778	20.2282	2.36081	0.136667	3.2701	0.0200502	2.26276	0.691956	127.973	2.86717	130.071	3.99229	168.537	55.1603	127.973	2.86717	NA
112	836.822	6109.42	1.36948	20.8486	1.89211	0.133145	2.64896	0.0201326	1.85389	0.699855	128.494	2.35855	126.919	3.16042	97.515	44.796	128.494	2.35855	NA
94	364.061	3384.18	1.03845	19.82	3.02758	0.140336	3.91612	0.020173	2.48391	0.634277	128.75	3.16629	133.343	4.89358	215.992	70.0971	128.75	3.16629	NA
294	146.566	2486.62	0.609373	16.5001	5.29033	0.170132	7.44958	0.0203596	5.24487	0.704049	129.929	6.74636	159.534	10.9984	625.255	114.109	129.929	6.74636	NA
43	105.116	2198.72	0.866427	15.1668	5.50459	0.190904	8.26554	0.0209995	6.16593	0.74598	133.97	8.17523	177.4	13.4544	804.241	115.35	133.97	8.17523	NA
261	270.408	5681.78	0.897321	18.6077	3.41563	0.156774	5.84615	0.0211576	4.74457	0.811571	134.968	6.33706	147.875	8.04515	360.195	77.07	134.968	6.33706	NA
243	310.774	1645.43	0.536554	22.4358	4.83046	0.130465	5.74469	0.0212293	3.10937	0.541259	135.42	4.1668	124.516	6.73194	-78.9879	118.266	135.42	4.1668	NA
253	139.602	5170	0.563056	13.5567	4.47614	0.219175	7.6818	0.0215499	6.24293	0.812692	137.444	8.48969	201.223	14.0232	1035.01	90.4513	137.444	8.48969	NA
73	987.24	405.428	0.372046	29.4009	11.2566	0.101108	11.5493	0.0215598	2.58342	0.223686	137.506	3.51474	97.7984	10.7685	-788.921	319.387	137.506	3.51474	NA
38	300.138	3629.19	0.447208	19.052	2.65539	0.156356	4.25423	0.021605	3.32376	0.781284	137.792	4.53127	147.509	5.84089	306.712	60.4965	137.792	4.53127	NA
212	86.1311	1738.51	0.629779	13.7014	4.92705	0.219241	8.16378	0.0217865	6.50933	0.797343	138.936	8.94708	201.278	14.9068	1013.52	99.8935	138.936	8.94708	NA
290	276.814	2893.31	5.73758	17.9064	3.59509	0.171587	4.99606	0.0222839	3.46929	0.694405	142.074	4.87504	160.795	7.42976	446.228	79.9487	142.074	4.87504	NA
259	219.123	1834.14	0.819334	19.3563	3.81964	0.160585	5.51001	0.0225438	3.97121	0.720727	143.712	5.64399	151.215	7.74139	270.491	87.6031	143.712	5.64399	NA
299	338.929	14673.3	0.718361	18.8848	2.5804	0.165095	3.87779	0.0226123	2.89461	0.746459	144.144	4.12611	155.153	5.57944	326.794	58.5784	144.144	4.12611	NA
16	257.98	4901.52	1.02488	19.797	2.97175	0.17427	3.8627	0.0250219	2.46762	0.638832	159.316	3.88314	163.118	5.82077	218.661	68.8007	159.316	3.88314	NA
119	153.956	2897.07	0.902764	16.8843	3.80575	0.22759	5.14469	0.02787	3.46181	0.67289	177.203	6.0509	208.207	9.68507	575.41	82.7607	177.203	6.0509	NA
77	709.413	305.893	0.383683	52.5354	18.1281	0.0744771	18.1949	0.0283775	1.55814	0.0856358	180.385	2.77169	72.9391	12.8064	-2858.93	1011.91	180.385	2.77169	NA
53	415.972	13960.7	1.23543	19.4594	2.2642	0.206738	3.96483	0.0291776	3.25473	0.820901	185.399	5.94828	190.811	6.89712	258.32	52.0339	185.399	5.94828	NA
193	119.526	2414.58	0.560063	16.7117	4.40758	0.247614	8.64887	0.0300119	7.44152	0.860404	190.623	13.9776	224.636	17.4312	597.742	95.5096	190.623	13.9776	NA
52	615.107	21052.5	0.370277	19.7749	1.5445	0.22588	2.39919	0.0323959	1.83593	0.76523	205.526	3.7138	206.792	4.48876	221.219	35.7384	205.526	3.7138	NA
120	221.49	1225	1.33986	21.7212	4.3457	0.206492	4.94989	0.0325302	2.36987	0.478773	206.364	4.81313	190.605	8.60231	-0.370713	104.776	206.364	4.81313	NA
285	1085.85	18698.4	9.34468	19.8213	0.847178	0.227426	1.56707	0.0326943	1.31833	0.841271	207.389	2.69055	208.071	2.94824	215.788	19.617	207.389	2.69055	NA
111	311.907	3034.42	1.17908	20.6003	2.22169	0.220509	3.34272	0.0329458	2.49757	0.747166	208.959	5.1352	202.334	6.13226	125.79	52.297	208.959	5.1352	NA
18	837.607	6243.51	0.402286	20.4806	1.75088	0.227482	3.01826	0.03379	2.45851	0.814548	214.225	5.1802	208.118	5.67966	139.535	41.1098	214.225	5.1802	NA
64	308.537	611.856	0.64688	28.6505	5.75576	0.165057	6.52568	0.0342977	3.07501	0.471217	217.39	6.57332	155.12	9.38761	-716.314	160.486	217.39	6.57332	NA
224	438.628	5733.17	0.402669	20.4627	1.87638	0.23367	2.46811	0.0346789	1.60336	0.64963	219.766	3.46426	213.224	4.74682	141.562	44.026	219.766	3.46426	NA
200	266.533	21559.5	0.952506	18.348	2.20861	0.261181	3.2969	0.0347559	2.44777	0.742446	220.245	5.30005	235.618	6.93276	391.822	49.5624	220.245	5.30005	NA
78	437.981	1419.54	0.757201	20.7764	2.84916	0.234788	4.39716	0.0353789	3.34923	0.76168	224.126	7.3775	214.144	8.48978	105.716	67.337	224.126	7.3775	NA
208	130.238	2971.26	0.609352	19.4862	3.65891	0.255	5.20345	0.0360385	3.69976	0.711021	228.231	8.29628	230.63	10.7358	255.138	84.1688	228.231	8.29628	NA
67	243.237	4446.56	1.39146	19.9467	2.77816	0.252021	3.73778	0.0364591	2.50056	0.668997	230.847	5.67034	228.216	7.6397	201.2	64.5022	230.847	5.67034	NA
91	256.082	7372.59	0.815599	19.0919	2.38319	0.267523	3.92211	0.0370433	3.11502	0.794221	234.48	7.17286	240.711	8.40553	301.949	54.3295	234.48	7.17286	NA
105	130.691	3322.08	0.813816	19.1424	3.44988	0.267317	4.78454	0.0371126	3.31514	0.692886	234.91	7.64742	240.546	10.2477	295.924	78.7351	234.91	7.64742	NA
79	1243.47	5153.48	2.46696	20.4551	1.00884	0.251109	2.95727	0.0372532	2.77987	0.940013	235.784	6.43608	227.477	6.02689	142.426	23.6607	235.784	6.43608	NA
82	540.417	4246.81	1.10786	20.4173	1.41214	0.252584	2.22666	0.0374027	1.72158	0.77317	236.714	4.00131	228.673	4.55916	146.803	33.1149	236.714	4.00131	NA
248	224.365	5076.09	0.877977	18.2833	2.98144	0.305072	3.68235	0.0404534	2.16119	0.586905	255.643	5.41681	270.354	8.74046	399.748	66.8099	255.643	5.41681	NA
46	377.747	9246.8	1.13719	19.831	1.89687	0.293679	2.32115	0.0422392	1.33777	0.576341	266.698	3.49502	261.451	5.35036	214.688	43.9501	266.698	3.49502	NA
54	317.667	15022.9	1.13192	19.2726	2.08116	0.302523	4.43748	0.0422861	3.91918	0.883201	266.988	10.25	268.369	10.4654	280.458	47.6354	266.988	10.25	NA
117	412.976	12521.7	1.17078	18.9557	1.81329	0.308742	2.24532	0.0424457	1.32417	0.589748	267.974	3.47571	273.205	5.37841	318.236	41.2011	267.974	3.47571	NA
203	362.106	8987.82	1.17464	19.6921	1.72043	0.320448	3.59597	0.0457665	3.15771	0.878124	288.478	8.9085	282.247	8.86123	230.916	39.7086	288.478	8.9085	NA
50	522.391	3415.63	1.19426	19.4917	2.76538	0.333322	4.25072	0.0471209	3.22821	0.759449	296.821	9.36476	292.099	10.7904	254.479	63.5744	296.821	9.36476	NA
227	167.273	5683.87	2.37548	19.053	2.3421	0.350502	3.63909	0.0484343	2.78524	0.765367	304.902	8.29455	305.099	9.59027	306.599	53.3357	304.902	8.29455	NA
273	213.773	726.762	1.0617	28.1936	3.77225	0.24111	4.25717	0.0493022	1.97323	0.463508	310.236	5.9767	219.329	8.39781	-671.736	104.146	310.236	5.9767	NA
257	477.38	4072.32	1.94892	18.1897	1.44138	0.402313	4.48613	0.0530747	4.24827	0.946979	333.371	13.8026	343.324	13.0691	411.237	32.2338	333.371	13.8026	NA
272	102.748	2549.09	1.07062	19.2496	3.6375	0.392593	4.93012	0.0548103	3.32785	0.675005	343.986	11.1473	336.262	14.1134	283.197	83.2133	343.986	11.1473	NA
198	125.577	6906.23	1.70928	18.1667	3.20657	0.420059	5.7796	0.0553459	4.80849	0.831978	347.259	16.2562	356.093	17.3609	414.056	71.6993	347.259	16.2562	NA
114	434.159	1446.87	1.06505	19.4129	1.53043	0.433332	2.49355	0.0610113	1.96865	0.789496	381.773	7.29754	365.54	7.65473	263.789	35.1205	381.773	7.29754	NA
23	255.716	1696.82	0.635933	19.1871	2.83896	0.484333	3.65907	0.0673988	2.30848	0.630893	420.465	9.39659	401.041	12.1237	290.586	64.8747	420.465	9.39659	144.696
262	307.999	15986.8	5.05326	16.9408	1.57063	0.556004	2.62955	0.0683144	2.10894	0.802017	425.992	8.69353	448.922	9.54095	568.183	34.179	425.992	8.69353	74.9744
6	154.389	2458.53	1.78333	16.0212	1.90255	0.592297	8.39464	0.0688232	8.1762	0.973979	429.062	33.9393	472.334	31.7167	688.452	40.595	429.062	33.9393	62.3227
99	416.97	14384.4	2.60948	17.9711	1.09076	0.528876	2.40742	0.0689328	2.14613	0.891468	429.723	8.92177	431.063	8.45615	438.212	24.2991	429.723	8.92177	98.0628
107	934.911	38573.5	5.8614	17.1949	0.649235	0.559832	1.22023	0.0698161	1.03318	0.846708	435.048	4.34651	451.417	4.44688	535.68	14.2185	435.048	4.34651	81.2141
215	166.15	7441.64	1.66207	17.5884	1.62368	0.572073	3.38946	0.0729753	2.97525	0.877795	454.056	13.0445	459.355	12.5245	485.958	35.8434	454.056	13.0445	93.4352
102	841.974	5022.3	1.80637	17.5553	0.919502	0.580601	1.86001	0.0739239	1.61684	0.869262	459.753	7.17457	464.848	6.93758	490.092	20.3037	459.753	7.17457	93.8094
34	659.538	2334.38	3.07607	16.1914	0.690773	0.645136	2.73096	0.075759	2.64215	0.967481	470.759	11.9949	505.481	10.8745	665.836	14.7732	470.759	11.9949	70.7019
108	390.703	3000.84	4.85209	17.7382	2.09151	0.608875	3.35702	0.0783316	2.62586	0.7822	486.156	12.2963	482.85	12.9007	467.182	46.3287	486.156	12.2963	104.061
234	711.304	29933.5	2.68765	17.5097	0.610221	0.637089	1.46156	0.0809054	1.32808	0.908671	501.525	6.40814	500.502	5.77537	495.836	13.4408	501.525	6.40814	101.147
188	83.5963	6821.71	2.81279	17.4623	3.01676	0.645521	6.82404	0.0817541	6.121	0.896976	506.584	29.8212	505.719	27.1883	501.826	66.4463	506.584	29.8212	100.948
222	217.493	9656.41	3.91764	14.9971	1.09886	0.758418	2.54054	0.0824927	2.2906	0.90162	510.984	11.2527	573.097	11.1265	827.798	22.9269	510.984	11.2527	61.7282
47	371.895	8628.36	3.79921	16.1483	0.91373	0.708329	3.20237	0.0829583	3.06925	0.95843	513.756	15.1565	543.753	13.4831	671.537	19.5455	513.756	15.1565	76.5045
90	248.771	10766	1.33585	17.7286	1.587	0.654951	2.5238	0.0842136	1.96239	0.777556	521.224	9.82589	511.521	10.142	468.365	35.1388	521.224	9.82589	111.286
37	166.825	6983.74	3.40909	18.3558	2.23061	0.634225	8.73399	0.0844335	8.44435	0.966837	522.532	42.384	498.725	34.4303	390.874	50.0519	522.532	42.384	133.683
96	446.065	15270.8	1.349	17.4352	0.91033	0.676451	1.58281	0.0855386	1.29483	0.818058	529.097	6.5773	524.627	6.48499	505.238	20.0185	529.097	6.5773	104.723
109	160.248	10571.8	0.906058	17.8299	2.31963	0.671037	3.51099	0.086775	2.63559	0.75067	536.436	13.566	521.343	14.3169	455.775	51.4774	536.436	13.566	117.697
48	101.558	2026.16	0.63359	17.5495	3.707	0.693481	8.18877	0.0882669	7.30165	0.891666	545.279	38.1774	534.89	34.0616	490.811	81.7954	545.279	38.1774	111.098
300	412.322	20366.2	17.6471	16.9033	0.679307	0.728631	2.59092	0.0893261	2.50029	0.965017	551.55	13.2169	555.75	11.0894	572.968	14.7719	551.55	13.2169	96.262
197	60.7622	1936.35	4.16577	17.1355	3.73238	0.728447	4.8498	0.0905302	3.09675	0.638531	558.672	16.5722	555.641	20.7566	543.264	81.5918	558.672	16.5722	102.836
15	152.386	6480.25	0.59448	17.9589	2.04542	0.695828	3.55299	0.0906317	2.90517	0.817669	559.272	15.563	536.296	14.8039	439.719	45.5267	559.272	15.563	127.189
235	81.7225	6834.54	0.972592	18.8391	3.12066	0.667229	3.86688	0.0911661	2.28348	0.590522	562.43	12.2987	519.026	15.7147	332.259	70.7772	562.43	12.2987	169.275
12	224.096	11974.4	1.92155	17.3278	1.59105	0.727444	5.18328	0.0914201	4.93305	0.951723	563.93	26.637	555.052	22.1666	518.776	34.9208	563.93	26.637	108.704
281	111.027	6574.97	1.47798	18.0527	2.24795	0.698595	3.07905	0.0914672	2.10411	0.683363	564.208	11.3669	537.951	12.859	428.119	50.1269	564.208	11.3669	131.788
249	120.219	10325.1	1.12595	17.6934	2.12893	0.717383	2.69853	0.0920581	1.65822	0.614491	567.697	9.0111	549.121	11.4462	472.8	47.1057	567.697	9.0111	120.071
190	194.352	13187.7	1.05679	17.5163	1.70031	0.725528	2.83291	0.0921712	2.2659	0.799849	568.365	12.3272	553.925	12.0952	494.977	37.4924	568.365	12.3272	114.827
95	146.306	16971	6.24703	16.8843	1.95167	0.760972	3.71813	0.0931858	3.16473	0.85116	574.351	17.3905	574.571	16.3158	575.44	42.4121	574.351	17.3905	99.8107
280	131.985	7522.59	2.88984	16.6773	2.13521	0.771155	2.76221	0.0932751	1.75235	0.6344	574.878	9.63774	580.425	12.2122	602.173	46.2176	574.878	9.63774	95.4672
204	708.834	31142.7	5.43931	16.6699	0.468997	0.771991	1.7552	0.0933349	1.69138	0.96364	575.23	9.30786	580.905	7.76452	603.133	10.1489	575.23	9.30786	95.3737
268	115.45	2652.73	8.92554	16.8863	3.22182	0.773548	5.03268	0.0947374	3.86623	0.768225	583.494	21.5685	581.796	22.2917	575.19	70.0697	583.494	21.5685	101.444
289	149.54	4097.75	0.778311	17.8869	2.61551	0.740163	3.18938	0.0960199	1.82518	0.572268	591.041	10.3078	562.501	13.7753	448.651	58.1175	591.041	10.3078	131.737
7	195.821	5016.85	2.24116	18.2053	1.78624	0.735453	2.52849	0.0971073	1.78959	0.707769	597.434	10.2111	559.749	10.8805	409.312	39.9605	597.434	10.2111	145.961
17	395.968	12762.7	1.27798	16.9646	0.85091	0.789864	1.63947	0.0971839	1.40136	0.854765	597.884	8.00172	591.094	7.34638	565.092	18.5312	597.884	8.00172	105.803
100	432.59	31423.4	1.33295	16.498	0.762539	0.838201	1.58768	0.100295	1.39258	0.877113	616.137	8.1829	618.152	7.35116	625.52	16.4605	616.137	8.1829	98.5
246	209.214	10468.3	3.47362	15.9815	1.3791	0.883632	1.80122	0.10242	1.15866	0.643262	628.578	6.93925	642.942	8.5799	693.753	29.379	628.578	6.93925	90.6055
56	642.203	34517.3	16.5162	16.1297	0.423507	0.902761	1.99191	0.105608	1.94636	0.977136	647.193	11.9851	653.202	9.59622	674.021	9.0371	647.193	11.9851	96.0196
49	135.092	9734.94	3.78188	16.0761	2.60323	0.960223	3.89242	0.111957	2.8938	0.743446	684.104	18.7825	683.412	19.3628	681.112	55.6366	684.104	18.7825	100.439
106	646.322	4668.42	2.71899	14.8867	0.77347	1.05352	2.98451	0.113747	2.88254	0.965834	694.474	18.9779	730.626	15.5482	843.154	16.0954	694.474	18.9779	82.3662
211	451.939	33096.8	4.46841	15.7853	0.628906	1.00396	1.33566	0.114939	1.17833	0.882208	701.37	7.83073	705.818	6.79451	719.977	13.3615	701.37	7.83073	97.4157
32	257.684	6882.88	2.07395	14.736	1.15046	1.19897	2.15026	0.12814	1.8166	0.844831	777.247	13.3015	800.11	11.905	864.334	23.8662	777.247	13.3015	89.9244
286	171.574	3571.57	0.724812	14.6238	1.62866	1.24556	2.17587	0.132107	1.44287	0.663124	799.875	10.8539	821.401	12.2553	880.12	33.682	799.875	10.8539	90.8825
230	113.002	8761.12	1.34781	15.3284	1.56241	1.1926	3.7382	0.132584	3.39603	0.908467	802.591	25.6279	797.167	20.6485	782.012	32.853	802.591	25.6279	102.632
254	364.327	24951.3	8.33725	14.6019	0.674298	1.29139	1.01811	0.136762	0.762801	0.749234	826.328	5.91597	841.916	5.82622	883.266	13.9438	826.328	5.91597	93.5538
266	145.724	18044.9	3.25299	14.4674	1.47656	1.31584	2.76653	0.138068	2.33955	0.845661	833.729	18.2969	852.693	15.9624	902.335	30.4382	833.729	18.2969	92.3968
251	301.574	32318.7	2.51953	14.4089	0.80938	1.47224	1.61923	0.153853	1.40243	0.866109	922.526	12.0547	919.048	9.79129	910.687	16.6668	910.687	16.6668	101.3
277	371.806	5559.63	1.95632	14.3974	1.37168	1.51228	2.18501	0.157911	1.70082	0.778401	945.159	14.9525	935.36	13.3559	912.327	28.2361	912.327	28.2361	103.599
282	169.572	2709.32	2.32924	14.0153	1.47941	1.43009	2.19026	0.145366	1.61511	0.737405	874.936	13.2142	901.587	13.0885	967.458	30.1816	967.458	30.1816	90.4366
219	195.881	18660.3	1.63016	13.8845	0.803574	1.68752	1.60796	0.169933	1.39277	0.866171	1011.74	13.0411	1003.83	10.2522	986.597	16.3446	986.597	16.3446	102.549
291	385.082	23671.9	1.40474	13.8101	0.730579	1.52638	1.97563	0.152883	1.83559	0.929113	917.101	15.6916	941.044	12.1205	997.489	14.8244	997.489	14.8244	91.9411
97	250.218	30592.8	6.24951	13.6803	0.585082	1.57607	2.27892	0.156376	2.20254	0.966482	936.607	19.2006	960.822	14.1581	1016.64	11.8528	1016.64	11.8528	92.1276
210	80.7221	7569.44	2.1188	13.6335	1.96734	1.8499	2.41638	0.182917	1.40302	0.580628	1082.89	13.9856	1063.39	15.9275	1023.58	39.8263	1023.58	39.8263	105.795
241	591.557	40481.5	2.1239	13.4959	0.270182	1.7107	3.79204	0.167446	3.78241	0.997459	998.022	34.9726	1012.55	24.3041	1044.08	5.46924	1044.08	5.46924	95.5886
20	217.549	24270.4	0.812392	13.4888	0.732699	1.78902	7.3848	0.17502	7.34836	0.995066	1039.71	70.5616	1041.47	48.1345	1045.17	14.798	1045.17	14.798	99.4775
81	396.977	25863.8	1.5481	13.472	0.622289	1.75239	1.53445	0.171222	1.4026	0.914075	1018.84	13.2182	1028.04	9.92011	1047.69	12.5659	1047.69	12.5659	97.2464
263	237.793	15586	1.44154	13.4517	0.706964	1.92503	1.45925	0.187808	1.27657	0.874808	1109.49	13.0116	1089.82	9.75173	1050.73	14.2673	1050.73	14.2673	105.592
232	202.062	18077	1.90992	13.424	0.763633	1.81159	1.87357	0.176376	1.71088	0.913168	1047.15	16.5361	1049.65	12.2582	1054.88	15.3985	1054.88	15.3985	99.267
57	257.632	19629.2	1.58084	13.4077	0.785626	1.86367	1.96637	0.181226	1.80261	0.916719	1073.67	17.8282	1068.29	12.9946	1057.33	15.8357	1057.33	15.8357	101.545
260	241.193	1826.02	0.793974	13.3841	0.966588	1.49062	2.88518	0.144695	2.71845	0.942212	871.16	22.1517	926.568	17.535	1060.87	19.4694	1060.87	19.4694	82.1171
1	141.683	14661	1.83092	13.3559	1.60433	1.90412	2.13093	0.184445	1.40248	0.658157	1091.21	14.0789	1082.53	14.1875	1065.12	32.2683	1065.12	32.2683	102.45
256	328.006	9069.6	2.61893	13.3556	0.643056	1.51416	1.91874	0.146668	1.80777	0.942166	882.256	14.9059	936.122	11.7339	1065.17	12.9209	1065.17	12.9209	82.828
225	218.235	19190.7	1.28646	13.2839	0.517636	1.75544	2.09078	0.169126	2.02569	0.968867	1007.29	18.8903	1029.17	13.5257	1075.99	10.3861	1075.99	10.3861	93.6156
98	304.683	28132.8	2.79358	13.0869	0.462664	1.90626	2.34546	0.180933	2.29937	0.980351	1072.07	22.7102	1083.28	15.6221	1105.89	9.2369	1105.89	9.2369	96.9418
214	84.5311	10704.3	0.843071	13.0799	1.75537	2.10384	2.31952	0.19958	1.51619	0.653667	1173.06	16.2615	1150.06	15.9653	1106.94	35.0761	1106.94	35.0761	105.974
237	115.721	4552.78	1.31271	12.9361	1.42863	2.08628	2.23674	0.195738	1.72105	0.769446	1152.38	18.1615	1144.3	15.3538	1129.03	28.4593	1129.03	28.4593	102.068
25	160.941	32285.8	1.13875	12.9098	1.33325	2.06914	2.00682	0.193735	1.49992	0.747411	1141.58	15.6923	1138.65	13.7384	1133.07	26.5434	1133.07	26.5434	100.75
271	531.195	19030.6	2.90936	12.905	0.382761	1.83675	1.86645	0.171913	1.82678	0.978746	1022.64	17.275	1058.7	12.2715	1133.79	7.60666	1133.79	7.60666	90.1966
61	110.833	14277.8	0.736415	12.8933	1.17639	2.13609	2.38248	0.199748	2.07179	0.869593	1173.97	22.2361	1160.56	16.4789	1135.6	23.4106	1135.6	23.4106	103.378
186	175.804	11502.8	0.48568	12.8841	1.4968	2.05303	2.14719	0.191844	1.53949	0.716978	1131.36	15.9744	1133.3	14.6621	1137.05	29.7742	1137.05	29.7742	99.4992
223	286.013	5797.41	1.02033	12.8362	0.612609	1.68525	2.1866	0.156892	2.09903	0.959952	939.48	18.3504	1002.97	13.935	1144.43	12.1718	1144.43	12.1718	82.0916
59	379.264	19330.8	1.84326	12.8343	0.962117	2.04647	3.78935	0.190491	3.66518	0.96723	1124.03	37.8065	1131.12	25.8522	1144.73	19.1023	1144.73	19.1023	98.1924
284	105.02	14006.4	1.14986	12.6791	1.50771	2.20119	2.13206	0.202415	1.50747	0.70705	1188.28	16.359	1181.42	14.887	1168.86	29.8597	1168.86	29.8597	101.662
293	342.939	30700.1	1.29777	12.6431	0.382577	2.16935	1.632	0.198921	1.58653	0.972135	1169.52	16.969	1171.27	11.343	1174.53	7.58903	1174.53	7.58903	99.5736
228	34.8213	5478.68	1.12053	12.5974	3.00072	2.20968	5.68528	0.201888	4.82888	0.849365	1185.45	52.2901	1184.11	39.7623	1181.68	59.317	1181.68	59.317	100.319
40	146.003	2576.98	0.929417	12.4348	1.47014	1.87149	3.47851	0.168782	3.15257	0.9063	1005.39	29.348	1071.06	23.0239	1207.31	28.9519	1207.31	28.9519	83.2756
236	225.672	22405.4	0.814049	12.3511	0.522508	2.32624	1.45074	0.208382	1.35338	0.932888	1220.19	15.0451	1220.33	10.3023	1220.59	10.2715	1220.59	10.2715	99.9674
233	56.6537	6085.36	1.83501	12.3223	1.88778	2.38104	3.07965	0.212792	2.43321	0.790093	1243.67	27.5213	1236.92	22.025	1225.16	37.0826	1225.16	37.0826	101.511
24	235.607	17691.8	1.12533	12.3034	1.43625	2.13959	2.85751	0.190921	2.47033	0.864505	1126.36	25.5297	1161.69	19.7756	1228.17	28.2183	1228.17	28.2183	91.7104
295	95.7087	25136	1.38153	11.8806	1.1993	2.43703	2.18783	0.209991	1.82983	0.836368	1228.77	20.4714	1253.6	15.7527	1296.48	23.3019	1296.48	23.3019	94.777
207	65.3142	12924.3	1.13357	11.8209	1.34919	2.72306	2.01538	0.233457	1.49714	0.742857	1352.59	18.2669	1334.77	14.9684	1306.27	26.1984	1306.27	26.1984	103.546
36	790.727	73108.4	9.82488	11.5938	0.282112	2.5458	0.952082	0.214066	0.909326	0.955092	1250.44	10.3358	1285.24	6.94099	1343.85	5.44943	1343.85	5.44943	93.0495
93	187.801	10796.1	1.75963	11.3684	1.44217	2.64634	2.19749	0.218194	1.65805	0.754519	1272.33	19.1445	1313.62	16.1951	1381.66	27.7102	1381.66	27.7102	92.0865
252	40.6668	5876.59	0.800559	11.113	2.37135	3.16007	3.24844	0.254698	2.22016	0.683452	1462.66	29.053	1447.46	25.0605	1425.19	45.2963	1425.19	45.2963	102.629
70	447.837	21156.8	1.66941	11.1088	0.456129	2.99832	1.3352	0.241571	1.25488	0.939839	1394.86	15.7396	1407.19	10.167	1425.91	8.71076	1425.91	8.71076	97.8227
104	57.7719	4091.15	0.575561	10.774	2.19607	3.36686	2.96821	0.263087	1.99688	0.672755	1505.62	26.8125	1496.72	23.2411	1484.13	41.6144	1484.13	41.6144	101.448
278	142.541	5080.85	1.20171	10.5946	1.8545	3.63339	2.53911	0.279187	1.73434	0.68305	1587.26	24.4015	1556.87	20.2201	1515.87	34.9919	1515.87	34.9919	104.71
33	304.715	36819.7	11.625	10.5518	0.532216	3.17089	1.66217	0.242665	1.57466	0.947352	1400.54	19.8225	1450.1	12.8316	1523.49	10.0302	1523.49	10.0302	91.9294
42	217.054	2451.28	1.02178	10.5392	1.40952	3.16924	2.58732	0.242249	2.16968	0.83858	1398.38	27.2753	1449.7	19.9726	1525.74	26.5595	1525.74	26.5595	91.6523
60	697.232	19415.8	1.10387	10.3371	0.192029	3.23968	0.918417	0.242884	0.898117	0.977897	1401.67	11.3141	1466.71	7.126	1562.15	3.60112	1562.15	3.60112	89.7276
209	43.1185	9403	0.75601	10.288	1.25375	3.83082	2.15422	0.285838	1.75179	0.813192	1620.7	25.1037	1599.24	17.3473	1571.07	23.4834	1571.07	23.4834	103.159
87	106.972	15029.2	2.35705	9.92621	0.62421	3.45141	1.70189	0.248473	1.58329	0.93031	1430.59	20.3133	1516.19	13.3994	1637.83	11.5915	1637.83	11.5915	87.3469
229	314.061	6844.29	0.911943	9.7233	0.445569	3.69495	1.75018	0.260568	1.69252	0.967051	1492.75	22.5532	1570.28	13.9868	1676.09	8.23374	1676.09	8.23374	89.0615
267	273.213	38378.7	1.38844	9.66079	0.236334	4.12076	1.74386	0.288728	1.72777	0.990774	1635.17	24.9536	1658.43	14.2499	1688	4.36062	1688	4.36062	96.8703
240	298.52	12706.7	1.2638	9.42378	0.255094	3.9312	2.7739	0.268688	2.76214	0.995762	1534.14	37.7106	1620.13	22.4576	1733.69	4.67974	1733.69	4.67974	88.4899
279	258.965	10711.5	1.76289	9.42003	0.215118	4.67823	1.11579	0.319619	1.09486	0.981239	1787.87	17.0946	1763.35	9.33453	1734.42	3.94601	1734.42	3.94601	103.081
83	269.46	29564	1.51025	9.14971	0.236312	4.68971	1.3587	0.311209	1.338	0.984759	1746.65	20.4717	1765.41	11.3718	1787.65	4.30628	1787.65	4.30628	97.707
199	102.154	17808.5	1.50085	9.13905	0.638545	4.82855	1.56605	0.320049	1.42996	0.913097	1789.97	22.3495	1789.88	13.1739	1789.77	11.6313	1789.77	11.6313	100.011
5	299.903	41198.7	4.61671	9.08481	0.354346	4.75545	2.20945	0.313333	2.18085	0.987056	1757.09	33.5413	1777.07	18.5385	1800.61	6.44686	1800.61	6.44686	97.5831
71	512.394	43957.2	5.27763	8.96855	0.168974	4.58792	1.02516	0.298426	1.01114	0.986323	1683.5	14.9813	1747.08	8.54669	1824	3.06549	1824	3.06549	92.2969
84	120.696	24904.9	1.54954	8.78225	0.46125	5.57411	5.05606	0.355042	5.03498	0.99583	1958.63	85.0488	1912.11	43.5559	1861.99	8.32755	1861.99	8.32755	105.19
39	227.851	30188.2	2.91253	8.66611	0.293924	5.1443	9.32312	0.323332	9.31849	0.999503	1805.98	146.798	1843.45	79.4199	1886	5.29048	1886	5.29048	95.7574
101	494.891	14957.4	2.29648	8.61737	0.18866	4.89195	1.84429	0.305742	1.83462	0.994754	1719.72	27.6926	1800.87	15.5495	1896.15	3.39297	1896.15	3.39297	90.6956
22	146.939	27415.9	1.77981	8.41958	0.509851	6.00586	2.4836	0.366745	2.43071	0.978702	2014.07	42.0469	1976.69	21.6218	1937.8	9.12421	1937.8	9.12421	103.936
217	178.412	33441.1	2.29831	8.11058	0.375614	5.86392	1.54141	0.344936	1.49495	0.969855	1910.37	24.7163	1955.91	13.3718	2004.44	6.66767	2004.44	6.66767	95.3069
92	398.516	40101.4	0.943312	7.96639	0.145372	6.29358	1.5462	0.363628	1.53935	0.99557	1999.35	26.4619	2017.56	13.5481	2036.23	2.56976	2036.23	2.56976	98.1886
66	76.4876	15213.9	0.781777	7.29255	0.710686	7.02097	2.25235	0.371343	2.13729	0.948915	2035.72	37.3091	2114.09	20.0213	2191.21	12.3547	2191.21	12.3547	92.9039
30	133.082	30879.1	0.893796	6.83506	0.453278	7.84739	1.24489	0.389015	1.15943	0.931355	2118.26	20.9327	2213.66	11.2121	2303.16	7.78437	2303.16	7.78437	91.9719
220	233.912	15684.7	1.66837	6.45871	0.204198	7.48881	1.89193	0.350798	1.88088	0.994158	1938.41	31.4883	2171.65	16.9489	2399.95	3.4727	2399.95	3.4727	80.7688
231	412.024	54935.5	1.59755	6.36077	0.150145	8.34692	2.21343	0.385065	2.20833	0.997697	2099.9	39.5778	2269.43	20.0729	2425.9	2.54394	2425.9	2.54394	86.5619
63	177.493	3838.37	0.639829	6.35635	0.382277	9.86146	3.31022	0.454619	3.28807	0.993309	2415.76	66.2481	2421.91	30.5261	2427.07	6.48048	2427.07	6.48048	99.5337
187	126.195	6179.95	0.437863	6.14936	0.281262	10.2718	2.33998	0.458114	2.32302	0.99275	2431.23	47.0501	2459.56	21.6552	2483.06	4.74316	2483.06	4.74316	97.9127
45	514.205	7739.9	0.446282	6.12166	0.120807	9.17993	6.04449	0.407575	6.04328	0.9998	2203.82	112.816	2356.11	55.4006	2490.67	2.03571	2490.67	2.03571	88.4833
250	182.395	40003.4	1.32834	5.64043	0.235168	11.5903	1.83119	0.474139	1.81602	0.991719	2501.68	37.6541	2571.89	17.1184	2627.68	3.91003	2627.68	3.91003	95.205
118	109.175	33659.3	1.0064	5.4189	0.282272	12.8506	1.28498	0.505049	1.25359	0.975574	2635.46	27.1181	2668.76	12.106	2694.08	4.66396	2694.08	4.66396	97.824
297	399.039	85356.4	11.3377	5.21541	0.149212	14.009	1.79255	0.529901	1.78632	0.99653	2741.03	39.8855	2750.32	16.9901	2757.13	2.45098	2757.13	2.45098	99.4163
255	65.8402	28163.4	1.66972	5.18769	0.275724	14.6354	1.73748	0.550652	1.71546	0.987328	2827.88	39.2706	2791.83	16.5152	2765.88	4.5254	2765.88	4.5254	102.242
4	33.6904	12039.4	1.28251	4.95187	1.56411	15.2362	2.74401	0.547197	2.25458	0.821637	2813.51	51.4033	2830.12	26.1519	2841.96	25.4936	2841.96	25.4936	98.9989
205	326.766	76183.8	3.59208	3.72371	0.120305	20.4092	1.16776	0.551191	1.16154	0.994679	2830.12	26.6068	3110.95	11.3038	3297.56	1.88817	3297.56	1.88817	85.8247
Sample:	14LQ-50		N29.13850	E88.15105
LEARY-14LQ-50FP-34 <>	174.882	19195.7	1.20635	23.0934	19.5949	0.0949361	19.7187	0.0159008	2.20658	0.111902	101.697	2.2264	92.0912	17.3618	-150.174	490.088	101.697	2.2264	NA
LEARY-14LQ-50FP-56 <>	77.8639	2424.03	1.37772	17.593	35.3501	0.126443	36.2372	0.0161337	7.969	0.219912	103.174	8.15653	120.897	41.3248	485.358	803.763	103.174	8.15653	NA
LEARY-14LQ-50FP-79 <>	98.8055	6828.9	1.23834	19.7883	25.0646	0.11943	26.1043	0.0171404	7.29384	0.279411	109.558	7.92347	114.555	28.2861	219.697	588.088	109.558	7.92347	NA
LEARY-14LQ-50FP-53 <>	159.306	7846.57	1.36516	23.138	16.4743	0.109677	17.4937	0.0184053	5.88447	0.336376	117.569	6.85563	105.67	17.558	-154.962	411.437	117.569	6.85563	NA
LEARY-14LQ-50FP-55 <>	153.862	7470.89	0.974358	18.7055	14.7351	0.169858	15.1787	0.0230437	3.64278	0.239993	146.864	5.28944	159.295	22.3814	348.361	334.78	146.864	5.28944	NA
LEARY-14LQ-50FP-1 <>	63.2951	22096.6	1.34837	21.0438	54.777	0.152343	55.5482	0.0232512	9.22421	0.166058	148.171	13.5117	143.978	74.7004	75.4093	1402.02	148.171	13.5117	NA
LEARY-14LQ-50FP-65 <>	100.113	4700.05	1.2168	18.4202	29.5302	0.174071	29.8854	0.0232551	4.59396	0.153719	148.195	6.73038	162.946	45.0199	383.008	676.997	148.195	6.73038	NA
LEARY-14LQ-50FP-32 <>	105.308	21583.2	0.833204	19.0142	19.6187	0.169161	19.8736	0.023328	3.17294	0.159656	148.655	4.66277	158.691	29.2048	311.253	450.333	148.655	4.66277	NA
LEARY-14LQ-50FP-9 <>	125.131	6327.89	0.565348	17.9115	21.1321	0.179586	22.5488	0.0233293	7.86676	0.348876	148.663	11.5611	167.704	34.8712	445.601	474.488	148.663	11.5611	NA
LEARY-14LQ-50FP-107 <>	82.6742	5489.91	0.963757	26.3248	82.167	0.122226	82.3012	0.0233361	4.69807	0.0570839	148.705	6.90633	117.088	91.2614	-486.111	2692.45	148.705	6.90633	NA
LEARY-14LQ-50FP-17 <>	85.8495	8392.87	0.915146	20.5956	22.6889	0.15743	23.0229	0.0235158	3.90753	0.169723	149.838	5.78743	148.451	31.8072	126.38	540.101	149.838	5.78743	NA
LEARY-14LQ-50FP-75 <>	98.0613	795.924	0.785733	15.4299	11.9097	0.211143	12.9648	0.0236286	5.12299	0.395147	150.548	7.6232	194.512	22.9536	768.134	251.627	150.548	7.6232	NA
LEARY-14LQ-50FP-81 <>	111.17	8024.49	0.790137	18.6383	23.7978	0.174814	24.2664	0.0236309	4.74548	0.195558	150.563	7.06214	163.588	36.68	356.485	544.191	150.563	7.06214	NA
LEARY-14LQ-50FP-15 <>	41.6668	1253.45	1.01142	22.8864	36.4995	0.142369	37.2844	0.0236315	7.60996	0.204106	150.566	11.3253	135.152	47.215	-127.875	928.469	150.566	11.3253	NA
LEARY-14LQ-50FP-76 <>	49.6237	3457.73	0.558516	19.7071	31.2135	0.165496	31.4184	0.0236542	3.5816	0.113997	150.71	5.3352	155.503	45.3293	229.16	737.014	150.71	5.3352	NA
LEARY-14LQ-50FP-11 <>	104.089	1938.51	0.598891	16.8356	29.7947	0.193962	30.0151	0.0236834	3.63081	0.120966	150.893	5.41503	180.005	49.5497	581.737	660.669	150.893	5.41503	NA
LEARY-14LQ-50FP-59 <>	116.348	12947	0.930598	19.9071	23.85	0.164145	24.2598	0.0236992	4.44034	0.183033	150.992	6.62667	154.325	34.7461	205.791	560.229	150.992	6.62667	NA
LEARY-14LQ-50FP-84 <>	103.365	16148.4	0.986024	18.7599	18.1397	0.17433	18.6734	0.0237193	4.43246	0.237367	151.119	6.6204	163.17	28.1545	341.796	413.616	151.119	6.6204	NA
LEARY-14LQ-50FP-57 <>	53.1637	4676.28	1.00303	27.4731	59.1292	0.119181	59.4554	0.0237473	6.21991	0.104615	151.296	9.30089	114.33	64.374	-600.818	1745.54	151.296	9.30089	NA
LEARY-14LQ-50FP-42 <>	89.785	6539.49	0.967514	16.4422	18.7246	0.19929	19.1479	0.0237653	4.00412	0.209115	151.409	5.99195	184.525	32.3191	632.865	406.472	151.409	5.99195	NA
LEARY-14LQ-50FP-50 <>	192.982	20953.2	1.11689	20.0772	15.4994	0.16343	15.7772	0.0237976	2.94753	0.186822	151.612	4.41666	153.701	22.5072	186.011	362.716	151.612	4.41666	NA
LEARY-14LQ-50FP-1 <>	46.5957	6162.86	1.49066	18.6847	29.8939	0.175822	30.9907	0.0238264	8.172	0.263692	151.793	12.2597	164.459	47.0873	350.913	689.521	151.793	12.2597	NA
LEARY-14LQ-50FP-103 <>	114.828	10979.8	0.910423	22.0898	13.1139	0.148862	14.1475	0.0238491	5.30823	0.375206	151.937	7.97085	140.906	18.6155	-41.0863	319.719	151.937	7.97085	NA
LEARY-14LQ-50FP-49 <>	177.847	16649.1	0.725644	21.2589	10.8695	0.154811	11.1452	0.0238694	2.46348	0.221035	152.064	3.70224	146.151	15.1719	51.187	260.105	152.064	3.70224	NA
LEARY-14LQ-50FP-22 <>	124.539	17566.3	1.13938	21.2901	23.8918	0.15467	24.0943	0.0238826	3.1167	0.129354	152.147	4.68645	146.027	32.7825	47.7189	577.808	152.147	4.68645	NA
LEARY-14LQ-50FP-70 <>	122.693	11546.8	1.08817	21.7062	22.2455	0.151716	22.3642	0.0238844	2.30139	0.102905	152.158	3.46075	143.426	29.9223	1.24563	541.773	152.158	3.46075	NA
LEARY-14LQ-50FP-5 <>	87.0303	10627.3	1.35717	20.4432	20.3057	0.161113	21.1613	0.023888	5.95651	0.281481	152.181	8.95854	151.677	29.8232	143.802	480.71	152.181	8.95854	NA
LEARY-14LQ-50FP-82 <>	57.0104	21438.7	0.855803	17.7164	20.0186	0.186386	20.8882	0.023949	5.96424	0.285532	152.566	8.99256	173.541	33.333	469.889	447.171	152.566	8.99256	NA
LEARY-14LQ-50FP-62 <>	62.2569	5773.69	0.936135	22.9529	34.498	0.144024	34.8755	0.0239758	5.11746	0.146735	152.734	7.72423	136.622	44.6098	-135.053	875.873	152.734	7.72423	NA
LEARY-14LQ-50FP-38 <>	162.976	19045	0.98749	21.3118	13.2626	0.155289	13.4398	0.0240028	2.17506	0.161837	152.904	3.28662	146.571	18.3451	45.2975	318.122	152.904	3.28662	NA
LEARY-14LQ-50FP-88 <>	72.4534	4425.49	0.973932	16.7094	57.7259	0.198338	57.8715	0.0240362	4.10253	0.0708904	153.115	6.20757	183.719	97.5561	598.046	1367.81	153.115	6.20757	NA
LEARY-14LQ-50FP-39 <>	87.0865	9352.3	1.27887	21.4945	42.7912	0.154378	42.9106	0.0240664	3.19852	0.0745392	153.305	4.84564	145.77	58.3324	24.8206	1070.72	153.305	4.84564	NA
LEARY-14LQ-50FP-101 <>	118.326	20644.2	1.14839	21.0517	20.001	0.157769	20.2151	0.0240885	2.93425	0.145152	153.444	4.44925	148.749	27.978	74.5407	479.481	153.444	4.44925	NA
LEARY-14LQ-50FP-45 <>	104.314	11872.6	1.20115	20.5133	22.7334	0.162217	22.977	0.0241341	3.337	0.145232	153.731	5.0693	152.642	32.5748	135.786	540.229	153.731	5.0693	NA
LEARY-14LQ-50FP-28 <>	74.8809	17300.2	1.45624	22.6706	23.521	0.146838	23.9764	0.0241436	4.65102	0.193983	153.79	7.06817	139.116	31.1808	-104.53	585.247	153.79	7.06817	NA
LEARY-14LQ-50FP-106 <>	104.867	11059.2	1.0735	18.0101	12.9145	0.184872	13.5574	0.0241483	4.12562	0.304307	153.82	6.27092	172.244	21.4819	433.382	288.771	153.82	6.27092	NA
LEARY-14LQ-50FP-33 <>	235.846	32664.5	1.14296	20.9171	9.81928	0.159212	10.2409	0.0241533	2.9084	0.283997	153.852	4.42164	150.013	14.2827	89.7857	233.186	153.852	4.42164	NA
LEARY-14LQ-50FP-16 <>	96.1529	15347.6	1.4511	25.0867	16.9548	0.132831	17.4785	0.0241681	4.24652	0.242957	153.945	6.45985	126.638	20.8127	-359.884	441.17	153.945	6.45985	NA
LEARY-14LQ-50FP-51 <>	34.3627	7966.79	1.40995	14.9202	54.4528	0.223679	55.2828	0.0242045	9.54382	0.172636	154.174	14.5396	204.967	102.959	838.483	1229	154.174	14.5396	NA
LEARY-14LQ-50FP-64 <>	96.6248	17116.1	1.00424	22.4236	25.3343	0.148878	25.8889	0.0242122	5.32972	0.205869	154.222	8.12206	140.921	34.0771	-77.6521	628.368	154.222	8.12206	NA
LEARY-14LQ-50FP-6 <>	80.7786	10607.9	1.10453	23.1635	21.407	0.144145	21.8674	0.0242161	4.46366	0.204124	154.247	6.80333	136.729	27.9806	-157.696	537.048	154.247	6.80333	NA
LEARY-14LQ-50FP-27 <>	83.5191	16166.7	1.22293	22.826	20.4314	0.14632	20.9913	0.0242233	4.81609	0.229432	154.292	7.34263	138.658	27.2127	-121.356	508.527	154.292	7.34263	NA
LEARY-14LQ-50FP-35 <>	60.5669	7609.71	0.944878	27.2667	37.0457	0.122551	37.3311	0.0242353	4.60702	0.12341	154.368	7.02727	117.382	41.4048	-580.361	1032.13	154.368	7.02727	NA
LEARY-14LQ-50FP-108 <>	204.238	25243.3	0.851524	22.3257	9.29334	0.149719	9.46978	0.0242427	1.81947	0.192134	154.415	2.77614	141.664	12.5221	-66.9629	227.283	154.415	2.77614	NA
LEARY-14LQ-50FP-13 <>	139.529	26608	1.08548	21.7484	12.918	0.153741	13.235	0.0242503	2.87892	0.217524	154.462	4.39399	145.21	17.9093	-3.38757	312.68	154.462	4.39399	NA
LEARY-14LQ-50FP-30 <>	219.006	24746.2	1.38926	21.7011	8.3497	0.154191	8.49652	0.0242683	1.57268	0.185097	154.575	2.40206	145.605	11.5258	1.81322	201.486	154.575	2.40206	NA
LEARY-14LQ-50FP-25 <>	133.914	22349.2	1.12531	22.1852	24.9868	0.150829	25.0907	0.0242687	2.28077	0.0909012	154.578	3.48364	142.644	33.402	-51.5711	616.415	154.578	3.48364	NA
LEARY-14LQ-50FP-83 <>	107.93	14833.6	1.15881	21.6177	27.1498	0.155077	27.2133	0.024314	1.85843	0.0682911	154.863	2.84372	146.385	37.1144	11.1089	663.553	154.863	2.84372	NA
LEARY-14LQ-50FP-77 <>	391.171	15597	0.785211	19.9829	6.63092	0.167891	6.82124	0.0243324	1.60009	0.234575	154.979	2.45023	157.587	9.95707	196.967	154.224	154.979	2.45023	NA
LEARY-14LQ-50FP-67 <>	70.9179	11568.8	1.41974	25.2512	24.1653	0.133013	24.3954	0.0243598	3.34325	0.137044	155.151	5.12518	126.801	29.0882	-376.818	634.874	155.151	5.12518	NA
LEARY-14LQ-50FP-20 <>	421.9	12957.9	0.922454	20.7603	6.04433	0.16197	7.1405	0.0243876	3.80168	0.532412	155.326	5.83443	152.427	10.1068	107.591	142.887	155.326	5.83443	NA
LEARY-14LQ-50FP-102 <>	218.374	33248.7	1.34329	20.4023	7.04692	0.164818	7.17687	0.0243883	1.35956	0.189436	155.331	2.08658	154.912	10.3116	148.512	165.355	155.331	2.08658	NA
LEARY-14LQ-50FP-43 <>	187.785	24864.5	0.853047	21.3281	3.96843	0.157726	4.26665	0.024398	1.5671	0.367291	155.392	2.40603	148.71	5.90226	43.4629	94.8932	155.392	2.40603	NA
LEARY-14LQ-50FP-48 <>	122.739	22121.6	0.95709	21.0953	18.9009	0.159557	19.0196	0.0244119	2.12113	0.111523	155.479	3.25846	150.316	26.58	69.5983	453.085	155.479	3.25846	NA
LEARY-14LQ-50FP-29 <>	48.7402	4206.33	1.16896	16.82	25.9245	0.200252	26.4139	0.0244287	5.06105	0.191605	155.585	7.77997	185.339	44.7764	583.711	571.674	155.585	7.77997	NA
LEARY-14LQ-50FP-24 <>	140.07	17426.6	1.15439	21.2436	10.71	0.158555	11.068	0.0244291	2.79191	0.252252	155.587	4.29186	149.437	15.3813	52.939	256.187	155.587	4.29186	NA
LEARY-14LQ-50FP-97 <>	61.0551	3102.78	1.14317	16.5261	21.2732	0.203882	21.9606	0.024437	5.45143	0.248237	155.637	8.38286	188.406	37.7807	621.852	463.72	155.637	8.38286	NA
LEARY-14LQ-50FP-100 <>	57.3169	3580.22	1.23482	19.5525	32.0221	0.17248	32.4727	0.024459	5.39058	0.166004	155.776	8.29658	161.569	48.5414	247.334	754.594	155.776	8.29658	NA
LEARY-14LQ-50FP-52 <>	109.181	29363.8	0.830962	22.6979	15.9717	0.148632	16.6793	0.0244679	4.80679	0.288188	155.831	7.40067	140.703	21.9183	-107.484	395.11	155.831	7.40067	NA
LEARY-14LQ-50FP-40 <>	111.871	14533.5	1.13871	19.8052	20.3187	0.170387	20.6564	0.0244746	3.71983	0.180081	155.874	5.72869	159.755	30.5438	217.669	474.584	155.874	5.72869	NA
LEARY-14LQ-50FP-63 <>	42.61	6211.9	1.30627	47.0069	83.0351	0.0717974	83.3889	0.0244776	7.6733	0.0920183	155.893	11.8186	70.4037	56.7788	NA	NA	155.893	11.8186	NA
LEARY-14LQ-50FP-109 <>	111.915	21976.3	1.24532	20.3513	18.0787	0.165841	18.3695	0.0244784	3.25598	0.177249	155.898	5.01511	155.803	26.5387	154.347	426.346	155.898	5.01511	NA
LEARY-14LQ-50FP-12 <>	142.702	12194.9	0.707889	20.2762	8.35941	0.16655	8.83307	0.0244923	2.85366	0.323065	155.985	4.39785	156.42	12.8058	163	195.717	155.985	4.39785	NA
LEARY-14LQ-50FP-3 <>	40.452	827.914	1.10437	18.7903	37.5388	0.17982	38.1616	0.0245059	6.86662	0.179935	156.07	10.5881	167.906	59.1248	338.123	878.785	156.07	10.5881	NA
LEARY-14LQ-50FP-78 <>	133.325	19446.1	0.60043	17.6375	6.75226	0.191588	7.50915	0.0245078	3.28547	0.437529	156.082	5.06646	177.983	12.2598	479.755	149.382	156.082	5.06646	NA
LEARY-14LQ-50FP-54 <>	51.8622	5072.79	0.96114	16.2645	34.2357	0.207905	35.0961	0.0245247	7.72353	0.220068	156.189	11.9183	191.793	61.4116	656.2	755.284	156.189	11.9183	NA
LEARY-14LQ-50FP-31 <>	589.819	137752	1.00822	20.25	4.83562	0.166992	5.04438	0.0245255	1.43615	0.284702	156.194	2.21622	156.805	7.32945	166.018	113.076	156.194	2.21622	NA
LEARY-14LQ-50FP-105 <>	120.864	17733.1	1.05968	21.44	7.27748	0.158073	7.90842	0.02458	3.09537	0.391402	156.537	4.78703	149.015	10.9612	30.9333	174.582	156.537	4.78703	NA
LEARY-14LQ-50FP-104 <>	306.778	29631.5	0.602808	20.2323	7.64746	0.167515	7.99809	0.0245808	2.34217	0.292841	156.542	3.62233	157.26	11.6527	168.062	178.836	156.542	3.62233	NA
LEARY-14LQ-50FP-4 <>	254.768	41185.2	1.20965	19.8955	10.8123	0.170569	10.9529	0.0246124	1.74922	0.159704	156.74	2.70867	159.912	16.2068	207.136	251.379	156.74	2.70867	NA
LEARY-14LQ-50FP-91 <>	36.2803	4681.84	1.26127	28.0291	105.339	0.121645	105.653	0.0247288	8.14126	0.0770564	157.473	12.665	116.562	116.859	-655.61	0	157.473	12.665	NA
LEARY-14LQ-50FP-8 <>	205.774	12838	1.07484	20.2373	14.1754	0.168813	14.5568	0.0247775	3.31016	0.227397	157.779	5.15935	158.389	21.3511	167.488	332.58	157.779	5.15935	NA
LEARY-14LQ-50FP-21 <>	50.3099	9175.96	1.50489	21.411	36.1422	0.15988	36.7985	0.0248272	6.91877	0.188018	158.092	10.805	150.598	51.5481	34.182	891.23	158.092	10.805	NA
LEARY-14LQ-50FP-110 <>	71.4432	1725.83	0.319875	17.0975	30.9269	0.200626	31.4314	0.0248781	5.60876	0.178445	158.412	8.77669	185.656	53.3793	548.119	690.785	158.412	8.77669	NA
LEARY-14LQ-50FP-93 <>	64.4124	4313.74	0.980237	18.8682	9.86311	0.182462	10.7723	0.024969	4.33152	0.402097	158.984	6.80219	170.177	16.8797	328.755	224.274	158.984	6.80219	NA
LEARY-14LQ-50FP-92 <>	196.9	29940.1	0.791908	20.833	11.2403	0.165584	11.8323	0.0250189	3.69593	0.312358	159.298	5.81539	155.579	17.0693	99.2915	266.618	159.298	5.81539	NA
LEARY-14LQ-50FP-72 <>	442.09	1874.98	0.413904	18.2053	5.2883	0.189691	5.73738	0.0250462	2.22519	0.387841	159.469	3.50496	176.365	9.28897	409.318	118.38	159.469	3.50496	NA
LEARY-14LQ-50FP-95 <>	97.2054	27003.8	1.13867	19.9258	32.7544	0.173335	33.1344	0.0250496	5.00368	0.151012	159.491	7.8825	162.309	49.7416	203.605	778.785	159.491	7.8825	NA
LEARY-14LQ-50FP-46 <>	68.5035	5670.82	0.719957	16.3161	14.4724	0.213794	15.4751	0.0252994	5.47982	0.354106	161.061	8.71652	196.731	27.6835	649.41	312.277	161.061	8.71652	NA
LEARY-14LQ-50FP-36 <>	49.5274	4633.71	1.34392	20.1236	31.7167	0.17389	32.559	0.0253792	7.35823	0.225997	161.563	11.7405	162.789	49.01	180.633	756.018	161.563	11.7405	NA
LEARY-14LQ-50FP-89 <>	49.0126	3202.56	0.723308	19.4025	31.2887	0.180948	31.9224	0.0254631	6.32908	0.198265	162.09	10.1309	168.876	49.7044	265.05	734.183	162.09	10.1309	NA
LEARY-14LQ-50FP-96 <>	103.991	18309.5	0.923022	20.6848	19.8987	0.170049	20.6816	0.0255107	5.63649	0.272537	162.39	9.03878	159.461	30.5291	116.168	473.3	162.39	9.03878	NA
LEARY-14LQ-50FP-73 <>	51.6027	7249.64	0.603987	25.1986	52.1903	0.147476	52.3289	0.0269524	3.80592	0.0727308	171.446	6.4391	139.681	68.392	-371.413	1440.92	171.446	6.4391	NA
LEARY-14LQ-50FP-74 <>	151.108	4761.21	0.625087	19.6406	8.52736	0.20136	9.337	0.0286832	3.80312	0.407317	182.301	6.83602	186.276	15.8918	236.988	196.999	182.301	6.83602	NA
LEARY-14LQ-50FP-10 <>	369.105	112254	5.2984	17.6295	1.43659	0.615931	1.75361	0.0787536	1.00567	0.573486	488.679	4.73285	487.294	6.78703	480.767	31.7404	488.679	4.73285	101.646
LEARY-14LQ-50FP-37 <>	42.9262	24982.5	0.418682	18.3205	15.5887	0.624859	16.079	0.083027	3.9407	0.245083	514.165	19.4748	492.888	62.8652	395.182	351.456	514.165	19.4748	130.108
LEARY-14LQ-50FP-87 <>	99.5578	41633.3	1.91984	17.3584	3.42692	0.667226	3.6487	0.0840006	1.25268	0.343323	519.958	6.25766	519.024	14.8278	514.895	75.3128	519.958	6.25766	100.983
LEARY-14LQ-50FP-66 <>	160.348	49389	2.41754	16.7243	3.88264	0.77013	4.15967	0.0934136	1.49262	0.358831	575.694	8.22039	579.838	18.3778	596.099	84.1256	575.694	8.22039	96.5769
LEARY-14LQ-50FP-68 <>	358.705	291260	6.01267	15.2059	0.61677	1.10645	2.92886	0.122023	2.86318	0.977576	742.198	20.0729	756.465	15.6223	798.854	12.9451	742.198	20.0729	92.9078
LEARY-14LQ-50FP-19 <>	79.1253	45126.1	1.34052	14.4472	4.6689	1.48751	6.11654	0.155862	3.95139	0.646016	933.739	34.3483	925.299	37.1556	905.217	96.263	905.217	96.263	103.151
LEARY-14LQ-50FP-44 <>	257.907	744855	1.79503	10.2051	0.40424	3.63001	2.82753	0.268673	2.79849	0.989728	1534.06	38.2051	1556.13	22.5131	1586.21	7.55696	1586.21	7.55696	96.7125
LEARY-14LQ-50FP-26 <>	101.539	144496	1.71297	10.1326	0.781359	3.71096	1.20638	0.272714	0.919148	0.761905	1554.57	12.6964	1573.73	9.64949	1599.52	14.5818	1599.52	14.5818	97.1897
LEARY-14LQ-50FP-71 <>	195.633	111369	0.657259	5.48829	0.499736	11.6702	5.55586	0.464531	5.53334	0.995946	2459.53	113.153	2578.32	52.0062	2673.04	8.27318	2673.04	8.27318	92.0125
Sample:	LiuquTuff	near	N29.15204	E88.09642
LEARY-LIUQUTUFF-27	2539.42	3640.89	0.400454	20.4849	4.9325	0.0342031	5.46301	0.00508157	2.34838	0.42987	32.6749	0.765392	34.1485	1.83452	139.047	115.888	32.6749	0.765392	NA
LEARY-LIUQUTUFF-57	405.418	22704.5	1.18138	21.236	9.30204	0.0877667	9.58351	0.0135176	2.30557	0.240577	86.5565	1.98228	85.4208	7.85158	53.7659	222.357	86.5565	1.98228	NA
LEARY-LIUQUTUFF-25	250.014	13951.7	0.826571	19.8257	11.4587	0.100805	13.5164	0.0144947	7.16888	0.530383	92.7681	6.60281	97.5191	12.5686	215.302	266.107	92.7681	6.60281	NA
LEARY-LIUQUTUFF-26	452.138	1734.66	0.651052	19.3308	6.26127	0.108175	7.42234	0.0151662	3.98592	0.537017	97.0337	3.83873	104.295	7.35695	273.509	143.6	97.0337	3.83873	NA
LEARY-LIUQUTUFF-55	300.349	26965	0.715352	19.113	9.83475	0.115073	11.0317	0.0159515	4.99765	0.453025	102.019	5.05839	110.595	11.5601	299.411	224.813	102.019	5.05839	NA
LEARY-LIUQUTUFF-6	140.871	10177.6	2.93337	20.2304	10.7046	0.113086	10.9783	0.0165926	2.43599	0.221892	106.085	2.56307	108.785	11.3256	168.279	250.629	106.085	2.56307	NA
LEARY-LIUQUTUFF-44	248.726	41887.7	1.70282	21.1363	8.60484	0.112215	8.93267	0.017202	2.39777	0.268427	109.948	2.61395	107.989	9.15134	65.0125	205.182	109.948	2.61395	NA
LEARY-LIUQUTUFF-52	43.8085	3640.09	1.70053	20.0362	44.6833	0.123639	45.4993	0.0179668	8.57872	0.188546	114.793	9.76063	118.366	50.8777	190.811	1089.72	114.793	9.76063	NA
LEARY-LIUQUTUFF-41	97.5672	5917.3	1.7354	24.5561	23.0036	0.104358	23.1874	0.0185859	2.91352	0.125651	118.712	3.42706	100.791	22.2518	-304.888	594.984	118.712	3.42706	NA
LEARY-LIUQUTUFF-45	170.816	6809.86	1.10515	17.9222	18.7994	0.147468	19.2587	0.0191685	4.1812	0.217107	122.399	5.06947	139.674	25.1365	444.266	421.307	122.399	5.06947	NA
LEARY-LIUQUTUFF-9	163.366	12576.9	1.67655	21.4258	15.4544	0.128681	15.6901	0.0199964	2.70964	0.172697	127.633	3.42438	122.912	18.1655	32.5326	372.091	127.633	3.42438	NA
LEARY-LIUQUTUFF-7	84.837	6662.67	1.30335	24.7252	30.5381	0.113355	32.7082	0.0203273	11.7156	0.358186	129.724	15.0462	109.03	33.8263	-322.479	799.581	129.724	15.0462	NA
LEARY-LIUQUTUFF-16	230.122	8066.9	1.0385	20.1829	8.32739	0.141555	8.79466	0.0207208	2.82855	0.321621	132.21	3.70154	134.428	11.0738	173.776	194.58	132.21	3.70154	NA
LEARY-LIUQUTUFF-43	229.35	16008.2	2.21747	20.0446	4.98582	0.171845	5.2688	0.0249823	1.70348	0.323315	159.067	2.67653	161.018	7.84542	189.79	116.074	159.067	2.67653	NA
LEARY-LIUQUTUFF-21	2544.89	203193	7.26586	20.2769	0.713446	0.181043	2.31021	0.0266245	2.19728	0.951119	169.388	3.67345	168.958	3.59582	162.916	16.6585	169.388	3.67345	NA
LEARY-LIUQUTUFF-47	385.549	69928.5	1.71405	20.1005	2.92542	0.235701	4.1993	0.0343611	3.01265	0.717417	217.785	6.45152	214.894	8.13324	183.305	68.1554	217.785	6.45152	NA
LEARY-LIUQUTUFF-54	484.876	131036	1.98177	19.4064	1.88654	0.292778	2.63191	0.0412082	1.83518	0.697283	260.317	4.68213	260.744	6.0523	264.59	43.3033	260.317	4.68213	NA
LEARY-LIUQUTUFF-32	635.229	60096.6	1.12132	18.9036	1.61703	0.3557	1.99899	0.048767	1.17523	0.587911	306.948	3.5228	308.999	5.32555	324.502	36.7171	306.948	3.5228	NA
LEARY-LIUQUTUFF-48	143.82	30496.3	0.850358	18.693	4.24262	0.383967	4.5697	0.052056	1.69775	0.371523	327.132	5.41531	329.953	12.8739	349.88	95.9208	327.132	5.41531	NA
LEARY-LIUQUTUFF-59	202.778	33638.2	1.42851	18.625	1.47092	0.390016	3.41349	0.0526839	3.08031	0.902393	330.978	9.93786	334.381	9.72534	358.1	33.1925	330.978	9.93786	NA
LEARY-LIUQUTUFF-56	311.451	35994.6	4.84487	18.5888	3.1878	0.415187	7.26787	0.055975	6.53145	0.898675	351.101	22.3188	352.603	21.6537	362.488	71.8934	351.101	22.3188	NA
LEARY-LIUQUTUFF-14	517.99	103168	3.65482	17.2215	1.57852	0.611915	2.4272	0.0764293	1.8438	0.759639	474.774	8.43929	484.767	9.35615	532.315	34.5925	474.774	8.43929	89.1905
LEARY-LIUQUTUFF-37	445.769	37820.5	0.623611	17.3617	0.887365	0.631654	2.17893	0.0795373	1.99005	0.913317	493.36	9.45184	497.125	8.56513	514.48	19.4829	493.36	9.45184	95.8949
LEARY-LIUQUTUFF-19	145.844	64455.2	1.94346	17.6327	3.56764	0.64721	4.16866	0.0827679	2.15632	0.517269	512.623	10.6257	506.761	16.6327	480.367	78.8654	512.623	10.6257	106.715
LEARY-LIUQUTUFF-17	340.493	71743.8	31.6383	17.3162	0.997977	0.660951	2.25629	0.0830081	2.02358	0.896863	514.053	9.99834	515.195	9.11693	520.247	21.9042	514.053	9.99834	98.8094
LEARY-LIUQUTUFF-31	166.35	57654.7	1.52939	17.201	1.74303	0.725336	3.35103	0.0904883	2.86204	0.854076	558.424	15.3097	553.812	14.3055	534.887	38.1692	558.424	15.3097	104.4
LEARY-LIUQUTUFF-24	213.243	77206.8	0.603959	16.8808	1.44728	0.78238	2.13375	0.0957876	1.56788	0.734803	589.675	8.83517	586.84	9.51049	575.869	31.4636	589.675	8.83517	102.397
LEARY-LIUQUTUFF-13	394.629	136118	2.84427	16.7512	0.614085	0.801569	1.15257	0.0973836	0.975361	0.846245	599.058	5.5797	597.713	5.20706	592.596	13.3051	599.058	5.5797	101.09
LEARY-LIUQUTUFF-39	545.329	91707.9	1.43411	16.4718	0.420048	0.836603	0.995772	0.0999448	0.902841	0.906674	614.085	5.28833	617.27	4.60572	628.944	9.07156	614.085	5.28833	97.6375
LEARY-LIUQUTUFF-18	651.941	106668	7.05397	15.8673	0.657638	0.91946	1.67691	0.105812	1.54258	0.919892	648.377	9.51519	662.074	8.15649	708.981	13.9634	648.377	9.51519	91.452
LEARY-LIUQUTUFF-40	263.291	71143.6	1.84913	15.2669	1.3193	1.06399	2.39593	0.117812	1.99998	0.834741	717.957	13.5883	735.791	12.5417	790.458	27.706	717.957	13.5883	90.828
LEARY-LIUQUTUFF-42	499.259	177094	3.07009	14.3453	0.69972	1.28738	2.61747	0.133942	2.52221	0.963606	810.313	19.2055	840.135	14.9593	919.819	14.3881	810.313	19.2055	88.0947
LEARY-LIUQUTUFF-34	820.439	507879	1.36826	14.7852	0.216561	1.32422	1.98743	0.141999	1.97559	0.994046	855.957	15.8357	856.358	11.498	857.378	4.49637	855.957	15.8357	99.8342
LEARY-LIUQUTUFF-36	226.156	83118.8	2.74419	14.2803	0.658455	1.49661	2.18204	0.155005	2.08032	0.953384	928.957	17.9975	929.01	13.2824	929.137	13.5083	929.137	13.5083	99.9806
LEARY-LIUQUTUFF-10	357.386	224273	8.26745	13.8223	0.581581	1.64791	10.223	0.1652	10.2064	0.99838	985.61	93.2891	988.749	64.688	995.738	11.8049	995.738	11.8049	98.9829
LEARY-LIUQUTUFF-46	496.787	50553.9	3.69175	13.7033	0.546517	1.58483	3.15198	0.157509	3.10423	0.984853	942.917	27.2305	964.268	19.6253	1013.25	11.0769	1013.25	11.0769	93.0588
LEARY-LIUQUTUFF-3	737.416	36198.1	2.46505	13.7004	0.73088	1.60951	3.14209	0.159928	3.0559	0.97257	956.377	27.1615	973.916	19.6806	1013.67	14.8126	1013.67	14.8126	94.3479
LEARY-LIUQUTUFF-23	170.501	82986.9	1.01616	13.6767	1.38068	1.34348	5.22101	0.133264	5.03515	0.9644	806.457	38.1695	864.737	30.4007	1017.17	27.9864	1017.17	27.9864	79.284
LEARY-LIUQUTUFF-20	284.293	88717.7	3.20738	13.3953	0.557545	1.88421	1.83904	0.183055	1.75249	0.952936	1083.64	17.4804	1075.55	12.1996	1059.19	11.2218	1059.19	11.2218	102.308
LEARY-LIUQUTUFF-51	251.069	340648	2.03682	13.1163	0.501784	1.91675	1.90679	0.182336	1.83958	0.964753	1079.73	18.2882	1086.94	12.7239	1101.39	10.0362	1101.39	10.0362	98.0327
LEARY-LIUQUTUFF-53	574.473	31747	1.14561	12.8025	0.252629	1.6835	2.92044	0.156318	2.90949	0.996252	936.28	25.3553	1002.31	18.6054	1149.65	5.01699	1149.65	5.01699	81.4407
LEARY-LIUQUTUFF-35	216.352	168329	1.11536	12.5599	0.330889	2.20308	1.2624	0.200686	1.21827	0.965038	1179	13.1265	1182.02	8.81661	1187.56	6.53512	1187.56	6.53512	99.2792
LEARY-LIUQUTUFF-15	197.699	235828	1.57387	10.7619	0.325472	3.34342	2.42553	0.260963	2.4036	0.990956	1494.77	32.0671	1491.26	18.9604	1486.25	6.16527	1486.25	6.16527	100.573
LEARY-LIUQUTUFF-11	201.181	69095.6	1.8539	10.5481	0.337021	3.06453	2.26543	0.234444	2.24022	0.988872	1357.75	27.4271	1423.87	17.3451	1524.15	6.35037	1524.15	6.35037	89.0822
LEARY-LIUQUTUFF-60	823.802	401908	9.00153	9.71389	0.136043	4.06476	3.2706	0.28637	3.26777	0.999135	1623.36	46.8963	1647.26	26.6583	1677.87	2.51338	1677.87	2.51338	96.7511
LEARY-LIUQUTUFF-4	381.68	432396	1.93822	9.23194	0.253516	4.94102	1.80696	0.330833	1.78909	0.990109	1842.42	28.6706	1809.29	15.2604	1771.33	4.62906	1771.33	4.62906	104.013
LEARY-LIUQUTUFF-33	241.401	197402	1.23007	8.87992	0.19372	5.16126	1.79896	0.332402	1.7885	0.994185	1850.01	28.7633	1846.25	15.3028	1842	3.50672	1842	3.50672	100.435
LEARY-LIUQUTUFF-61	285.027	143196	1.79301	8.75828	0.165303	5.44834	1.31589	0.346084	1.30547	0.992078	1915.87	21.6369	1892.49	11.2897	1866.93	2.98332	1866.93	2.98332	102.622
LEARY-LIUQUTUFF-62	469.515	848937	3.85696	8.6883	0.209913	5.49865	3.13537	0.34649	3.12833	0.997756	1917.81	51.8953	1900.39	26.9435	1881.39	3.7818	1881.39	3.7818	101.936
LEARY-LIUQUTUFF-29	434.786	169954	1.67631	6.42158	0.77565	7.30866	2.70702	0.340391	2.59351	0.95807	1888.55	42.4581	2149.87	24.183	2409.75	13.178	2409.75	13.178	78.3713
LEARY-LIUQUTUFF-1	226.366	333788	4.24728	6.25947	2.45651	8.71405	9.09299	0.3956	8.75488	0.962817	2148.75	160.012	2308.55	83.0084	2453.09	41.5524	2453.09	41.5524	87.5936
LEARY-LIUQUTUFF-38	56.0402	73219.5	0.776333	5.74275	0.377219	11.6174	3.08036	0.483868	3.05717	0.992474	2544.09	64.2665	2574.07	28.8063	2597.75	6.28692	2597.75	6.28692	97.9345
LEARY-LIUQUTUFF-50	414.401	254479	1.70822	5.47175	0.589399	12.4801	3.6486	0.495271	3.60068	0.986866	2593.44	76.8857	2641.23	34.312	2678.04	9.75293	2678.04	9.75293	96.8411
Sample:	LQ-1		N29.11766	E88.28813
LQ-1-1 <>	376.201	85891.2	1.62269	13.9281	0.387449	1.6653	2.39412	0.168222	2.36256	0.986818	1002.31	21.931	995.397	15.1899	980.189	7.90221	980.189	7.90221	102.256
LQ-1-2 <>	377.315	29707.1	3.88174	16.0665	0.4958	0.999637	1.03416	0.116483	0.90756	0.877583	710.287	6.10384	703.626	5.24943	682.393	10.5681	710.287	6.10384	104.088
LQ-1-3 <>	431.247	566187	2.77302	6.08613	0.0944082	9.03967	1.81546	0.399018	1.813	0.998647	2164.52	33.3341	2342.03	16.5992	2500.47	1.58929	2500.47	1.58929	86.5644
LQ-1-4 <>	212.338	15128.7	1.16743	17.7098	1.36434	0.650412	3.74433	0.0835411	3.48692	0.931253	517.225	17.3307	508.732	14.9841	470.76	30.2189	517.225	17.3307	109.87
LQ-1-5 <>	440.073	42664.4	1.01966	19.7312	2.65426	0.131241	3.26753	0.0187811	1.90569	0.58322	119.948	2.26471	125.212	3.84916	226.348	61.3637	119.948	2.26471	NA
LQ-1-6 <>	351.84	72978.1	1.0461	16.7697	0.919984	0.752972	2.76489	0.0915806	2.60735	0.943019	564.878	14.1015	569.948	12.0596	590.243	19.9523	564.878	14.1015	95.7026
LQ-1-7 <>	195.805	35990.8	1.64214	12.7575	0.648173	2.07103	1.22074	0.191624	1.03445	0.847393	1130.17	10.7235	1139.27	8.35923	1156.64	12.8412	1156.64	12.8412	97.7111
LQ-1-8 <>	530.205	6172.58	0.905304	21.3065	4.19956	0.124228	4.28274	0.0191969	0.839982	0.196132	122.578	1.01991	118.898	4.8053	45.8631	100.376	122.578	1.01991	NA
LQ-1-11 <>	120.267	7573.9	0.404416	11.2592	0.776392	2.94579	2.21033	0.240551	2.06949	0.936279	1389.56	25.8688	1393.76	16.7569	1400.18	14.8789	1400.18	14.8789	99.2415
LQ-1-12 <>	209.438	62799.7	0.848395	13.4375	0.976178	1.80103	1.90075	0.175526	1.63093	0.858045	1042.48	15.6987	1045.83	12.4103	1052.85	19.6853	1052.85	19.6853	99.0151
LQ-1-13 <>	54.6319	27628.6	1.6894	5.46255	0.404971	11.3759	2.63367	0.450692	2.60235	0.988107	2398.33	52.1192	2554.45	24.5858	2680.82	6.69934	2680.82	6.69934	89.4625
LQ-1-14 <>	269.716	2876.02	1.15198	17.5887	21.4419	0.187707	21.9357	0.0239449	4.62839	0.210998	152.539	6.97725	174.671	35.215	485.904	478.283	152.539	6.97725	NA
LQ-1-17 <>	154.198	19961.8	2.71121	13.3644	1.33216	1.91319	1.36911	0.185441	0.315931	0.230756	1096.63	3.18593	1085.7	9.12999	1063.85	26.7964	1063.85	26.7964	103.082
LQ-1-18 <>	49.8558	11871.2	2.19044	12.778	1.803	2.05786	2.18712	0.190713	1.23802	0.566049	1125.23	12.7826	1134.91	14.9463	1153.44	35.7885	1153.44	35.7885	97.5542
LQ-1-20 <>	62.0087	3742.56	0.468743	17.5882	5.94204	0.636972	6.65038	0.081253	2.98659	0.449085	503.597	14.4679	500.43	26.2816	485.976	131.269	503.597	14.4679	103.626
LQ-1-21 <>	259	248418	3.63193	3.64032	0.0854282	22.6902	1.93275	0.599068	1.93086	0.999023	3026.08	46.6321	3213.75	18.7985	3333.06	1.33702	3333.06	1.33702	90.7898
LQ-1-23 <>	137.781	15641.9	2.46774	13.3338	1.30493	1.92299	1.47951	0.185965	0.697214	0.471248	1099.48	7.04764	1089.11	9.8835	1068.45	26.2482	1068.45	26.2482	102.904
LQ-1-26 <>	224.537	49610.2	0.853723	17.2179	1.05612	0.663992	1.32105	0.0829168	0.793577	0.600719	513.509	3.91701	517.053	5.35258	532.761	23.1484	513.509	3.91701	96.3864
LQ-1-27 <>	203.542	39180.7	0.8714	18.2937	2.9325	0.620509	3.17059	0.0823281	1.20544	0.380193	510.004	5.91087	490.167	12.3279	398.472	65.735	510.004	5.91087	127.99
LQ-1-28 <>	115.587	46267.1	1.20076	8.14452	0.530461	5.81778	1.51341	0.343654	1.4174	0.93656	1904.22	23.3693	1949.06	13.1137	1997.03	9.42534	1997.03	9.42534	95.3529
LQ-1-32 <>	312.065	72535.7	2.84536	13.7332	0.760346	1.64381	3.07841	0.163728	2.98303	0.969017	977.462	27.0552	987.178	19.4371	1008.82	15.4017	1008.82	15.4017	96.8914
LQ-1-34 <>	94.7623	2955.7	0.661096	18.9153	12.0085	0.271195	12.2802	0.0372043	2.56897	0.209196	235.481	5.94027	243.649	26.6074	323.124	273.584	235.481	5.94027	NA
LQ-1-35 <>	580.727	44674.7	1.837	19.916	4.50362	0.238705	5.18578	0.0344795	2.57093	0.495766	218.523	5.52394	217.359	10.1473	204.793	104.539	218.523	5.52394	NA
LQ-1-37 <>	248.558	57588.5	8.65347	14.2661	0.738643	1.47858	5.83383	0.152985	5.78688	0.991952	917.673	49.4989	921.648	35.3509	931.154	15.1443	931.154	15.1443	98.5522
LQ-1-39 <>	304.632	75125.5	5.00981	14.6753	0.789837	1.29157	2.43468	0.137468	2.303	0.945916	830.329	17.9422	841.992	13.9342	872.854	16.3644	830.329	17.9422	95.1281
LQ-1-41 <>	258.954	4512.47	0.481148	20.1173	7.4774	0.134666	7.55817	0.0196484	1.10205	0.145809	125.433	1.36898	128.282	9.10853	181.356	174.436	125.433	1.36898	NA
Sample:	LQ-2		N29.11740	E88.28860
LEARY-LQ-2-2 <>	308.207	18393	0.885666	17.859	4.04297	0.185254	4.33884	0.023995	1.57478	0.362949	152.855	2.37882	172.571	6.88597	452.12	89.8004	152.855	2.37882	NA
LEARY-LQ-2-5 <>	109.999	28924.4	1.18635	14.0728	0.632167	1.5049	1.69291	0.153599	1.57044	0.927662	921.107	13.4795	932.375	10.3275	959.089	12.8995	959.089	12.8995	96.0398
LEARY-LQ-2-6 <>	107.745	92898.9	0.933854	11.6673	0.842397	2.67809	2.43904	0.226618	2.28895	0.938463	1316.75	27.261	1322.43	18.0342	1331.63	16.2992	1331.63	16.2992	98.8826
LEARY-LQ-2-7 <>	31.8861	545.666	1.08881	10.3261	16.0904	0.337597	18.6525	0.0252832	9.43479	0.505819	160.959	14.9982	295.349	47.8367	1564.15	303.642	160.959	14.9982	NA
LEARY-LQ-2-8 <>	327.793	71811.9	5.9397	16.9654	1.14968	0.753557	1.45522	0.092721	0.892138	0.61306	571.609	4.87999	570.286	6.34982	564.995	25.0224	571.609	4.87999	101.171
LEARY-LQ-2-10 <>	296.813	17206.5	1.04574	17.1197	1.42554	0.689454	4.2795	0.0856053	4.03509	0.942889	529.494	20.5117	532.472	17.7348	545.245	31.146	529.494	20.5117	97.1112
LEARY-LQ-2-12 <>	105.621	14654	6.32571	15.2913	5.18777	0.932595	7.30527	0.103428	5.14335	0.70406	634.465	31.0785	668.999	35.8095	787.102	108.991	634.465	31.0785	80.6078
LEARY-LQ-2-13 <>	176.874	23826.2	0.820771	17.2317	2.19291	0.680779	2.82272	0.0850812	1.77732	0.62965	526.381	8.98372	527.245	11.6094	531.008	48.0224	526.381	8.98372	99.1287
LEARY-LQ-2-15 <>	106.978	33666.5	1.03006	18.1697	10.2997	0.667291	10.488	0.0879351	1.97865	0.188659	543.314	10.3097	519.064	42.6463	413.687	230.762	543.314	10.3097	131.334
LEARY-LQ-2-17 <>	122.364	9478.83	3.10403	17.6852	6.12912	0.346702	8.31558	0.0444699	5.61985	0.675823	280.48	15.4246	302.238	21.7407	473.789	135.671	280.48	15.4246	NA
LEARY-LQ-2-18 <>	104.769	31432.1	1.1255	12.7874	1.22778	2.15057	2.73197	0.199451	2.44053	0.893324	1172.37	26.1612	1165.24	18.9374	1151.99	24.3934	1151.99	24.3934	101.769
LEARY-LQ-2-19 <>	100.658	49602	0.817086	15.9068	2.86631	0.827724	3.0757	0.0954922	1.11543	0.362659	587.937	6.26786	612.349	14.1441	703.686	60.9926	587.937	6.26786	83.5511
LEARY-LQ-2-22 <>	25.9719	9549.37	0.838273	12.7899	4.90595	2.09225	5.15538	0.194078	1.58416	0.307283	1143.43	16.5982	1146.26	35.4328	1151.61	97.4448	1151.61	97.4448	99.2897
LEARY-LQ-2-23 <>	64.178	69319.7	1.18153	7.31176	0.546375	7.74564	1.943	0.41075	1.8646	0.959649	2218.35	34.9973	2201.91	17.4747	2186.63	9.50246	2186.63	9.50246	101.451
LEARY-LQ-2-24 <>	96.8642	8421.93	0.653549	18.4948	7.33063	0.279813	8.10225	0.0375332	3.45084	0.425912	237.525	8.04744	250.509	17.9888	373.916	165.205	237.525	8.04744	NA
LEARY-LQ-2-26 <>	323.09	83470	3.99525	14.6935	1.39897	1.33309	3.49891	0.142064	3.20707	0.916589	856.323	25.7171	860.227	20.3025	870.321	28.9691	856.323	25.7171	98.3916
LEARY-LQ-2-27 <>	79.1065	18690.9	1.08238	17.7525	4.49992	0.635124	6.96106	0.0817744	5.31104	0.762964	506.705	25.881	499.283	27.4612	465.398	99.7505	506.705	25.881	108.876
LEARY-LQ-2-29 <>	65.9502	2326.07	0.941346	-45.0992	418.761	-0.0481297	418.79	0.0157428	4.95361	0.0118284	100.694	4.94922	-50.0853	-218.315	NA	NA	100.694	4.94922	NA
LEARY-LQ-2-30 <>	299.13	13036.7	1.67151	21.7775	4.79314	0.147773	5.00597	0.0233401	1.44411	0.288479	148.731	2.12325	139.944	6.54429	-6.61761	115.726	148.731	2.12325	NA
LEARY-LQ-2-31 <>	171.281	1193.42	0.429278	25.5204	15.0696	0.0794834	15.5016	0.0147117	3.6343	0.234446	94.1469	3.39671	77.6591	11.5901	-404.424	395.17	94.1469	3.39671	NA
LEARY-LQ-2-32 <>	31.8732	33840.9	0.975023	6.28362	0.647385	8.65065	8.40555	0.394237	8.38058	0.99703	2142.45	152.79	2301.9	76.65	2446.57	10.9576	2446.57	10.9576	87.5694
LEARY-LQ-2-33 <>	597.096	100175	2.56359	18.1187	0.956834	0.514159	1.50494	0.0675652	1.16159	0.771856	421.47	4.73916	421.242	5.18893	419.97	21.3646	421.47	4.73916	100.357
LEARY-LQ-2-34 <>	280.968	5126.14	1.09038	23.754	12.5077	0.0829526	12.9805	0.0142911	3.47155	0.267444	91.4743	3.15315	80.917	10.0962	-220.638	315.659	91.4743	3.15315	NA
LEARY-LQ-2-36 <>	67.1244	16718.7	0.552728	16.0751	5.05175	0.699318	6.45069	0.0815317	4.01139	0.621854	505.259	19.494	538.384	26.9611	681.252	107.967	505.259	19.494	74.1662
LEARY-LQ-2-39 <>	258.821	59970.8	1.29328	13.19	0.754881	1.91372	2.1795	0.183073	2.0446	0.938104	1083.74	20.3958	1085.88	14.5361	1090.19	15.1245	1090.19	15.1245	99.4084
LEARY-LQ-2-40 <>	491.555	54801.9	1.6339	20.0529	2.13848	0.232076	3.0121	0.0337525	2.12125	0.704241	213.991	4.46477	211.911	5.76099	188.825	49.7564	213.991	4.46477	NA
LEARY-LQ-2-41 <>	46.9695	31690.7	0.923814	14.2201	1.93219	1.47876	3.12679	0.15251	2.45835	0.786221	915.019	20.9709	921.724	18.9427	937.784	39.6247	937.784	39.6247	97.5725
LEARY-LQ-2-42 <>	50.5193	2191.95	2.34262	20.655	52.7471	0.116577	53.3301	0.0174637	7.86421	0.147463	111.607	8.70144	111.964	56.5947	119.587	1331.09	111.607	8.70144	NA
LEARY-LQ-2-43 <>	185.993	79844.3	1.95844	11.366	0.366777	2.92275	1.67711	0.240934	1.63652	0.975793	1391.55	20.4828	1387.82	12.6887	1382.07	7.04628	1382.07	7.04628	100.686
LEARY-LQ-2-44 <>	54.5989	9340.32	1.16095	21.7252	21.9348	0.218462	22.2182	0.0344221	3.53725	0.159205	218.165	7.58793	200.629	40.4698	-0.810088	534.256	218.165	7.58793	NA
LEARY-LQ-2-46 <>	101.276	8445.34	0.940673	16.2688	3.66679	0.670612	7.47055	0.0791272	6.50874	0.871254	490.911	30.766	521.085	30.4585	655.647	78.6899	490.911	30.766	74.8743
LEARY-LQ-2-47 <>	104.222	11018.5	1.25699	24.2265	17.1541	0.141835	17.4799	0.0249215	3.35941	0.192187	158.685	5.26581	134.677	22.0505	-270.436	438.475	158.685	5.26581	NA
LEARY-LQ-2-48 <>	258.455	8001.82	0.858135	20.8185	6.27477	0.122145	6.69706	0.0184427	2.34046	0.349477	117.806	2.73217	117.015	7.40198	100.952	148.526	117.806	2.73217	NA
LEARY-LQ-2-49 <>	156.694	5604.68	0.851324	17.6275	10.0488	0.124897	10.452	0.0159676	2.87535	0.2751	102.121	2.9132	119.502	11.7839	481.016	222.493	102.121	2.9132	NA
LEARY-LQ-2-50 <>	675.217	21070.3	9.16144	19.8273	1.24464	0.26091	2.13514	0.0375192	1.73484	0.812519	237.437	4.04422	235.4	4.48605	215.126	28.8295	237.437	4.04422	NA
LEARY-LQ-2-51 <>	44.7151	4205.5	1.49647	14.5776	3.48465	1.27736	3.90975	0.135051	1.77295	0.453468	816.615	13.5987	835.677	22.2705	886.683	72.0194	816.615	13.5987	92.0978
LEARY-LQ-2-52 <>	619.449	143804	8.52667	16.983	0.617361	0.723347	3.24227	0.0890965	3.18295	0.981705	550.192	16.7859	552.641	13.8191	562.726	13.4299	550.192	16.7859	97.7726
LEARY-LQ-2-53 <>	91.0005	50869	1.80678	9.81222	0.744345	4.09206	3.43679	0.291211	3.35522	0.976265	1647.58	48.7819	1652.72	28.0506	1659.25	13.7828	1659.25	13.7828	99.2966
LEARY-LQ-2-54 <>	500.669	190161	2.58236	18.1612	1.28717	0.521511	2.44182	0.0686921	2.07501	0.84978	428.271	8.59791	426.16	8.49849	414.736	28.7674	428.271	8.59791	103.264
LEARY-LQ-2-57 <>	180.975	200594	1.28917	7.38101	0.258322	7.49335	3.43523	0.401135	3.42551	0.997169	2174.26	63.2219	2172.19	30.7834	2170.22	4.50187	2170.22	4.50187	100.186
LEARY-LQ-2-58 <>	101.903	74761	0.860625	13.6936	1.7946	1.67079	2.70014	0.165935	2.01747	0.747173	989.675	18.5093	997.486	17.153	1014.68	36.3734	1014.68	36.3734	97.5357
LEARY-LQ-2-59 <>	54.2605	7773.07	0.705084	15.7813	9.45398	0.765711	10.5432	0.0876406	4.6671	0.442664	541.568	24.2431	577.299	46.457	720.526	201.06	541.568	24.2431	75.1629
LEARY-LQ-2-60 <>	270.372	28268.5	1.15511	17.9857	3.93404	0.227525	4.06955	0.0296795	1.04139	0.255898	188.542	1.93503	208.154	7.6592	436.393	87.6062	188.542	1.93503	NA
LEARY-LQ-2-62 <>	63.3514	36997.6	1.16795	12.6746	2.73169	2.15735	2.8659	0.198314	0.866754	0.302437	1166.26	9.24692	1167.42	19.8859	1169.56	54.0816	1169.56	54.0816	99.7174
LEARY-LQ-2-63 <>	59.3815	2075.61	0.812075	20.7038	30.9299	0.11494	31.9808	0.0172592	8.13106	0.254248	110.311	8.89312	110.474	33.4886	114.005	745.413	110.311	8.89312	NA
LEARY-LQ-2-64 <>	280.049	3408.04	0.636558	22.2812	7.2378	0.0923034	7.42641	0.0149161	1.66307	0.22394	95.445	1.57563	89.6468	6.37219	-62.0877	176.718	95.445	1.57563	NA
LEARY-LQ-2-65 <>	219.098	9882.97	1.68211	16.8932	2.48333	0.689766	4.26923	0.0845106	3.47266	0.813416	522.99	17.4445	532.66	17.6969	574.293	54.0074	522.99	17.4445	91.0668
LEARY-LQ-2-66 <>	122.631	5309.14	1.40246	18.177	4.81551	0.536943	7.39905	0.0707863	5.61755	0.759226	440.891	23.9394	436.407	26.2527	412.797	107.699	440.891	23.9394	106.806
LEARY-LQ-2-67 <>	54.2357	14135.9	1.18046	13.4633	13.5905	0.407627	14.1979	0.0398027	4.10824	0.289356	251.61	10.1376	347.165	41.7708	1049	275.178	251.61	10.1376	NA
LEARY-LQ-2-69 <>	76.4711	21758.6	1.41646	13.4428	1.87027	1.72372	2.76439	0.168056	2.03566	0.736388	1001.39	18.8806	1017.41	17.7655	1052.07	37.6943	1052.07	37.6943	95.1828
LEARY-LQ-2-70 <>	220.13	64426.9	1.70444	16.2676	1.15518	0.9481	2.38605	0.11186	2.08777	0.874991	683.543	13.5403	677.113	11.7916	655.807	24.7592	683.543	13.5403	104.229
LEARY-LQ-2-71 <>	337.672	71164.6	1.34852	15.7604	1.16687	1.0082	3.27322	0.115242	3.05816	0.934299	703.121	20.3715	707.963	16.6872	723.332	24.7347	703.121	20.3715	97.2059
LEARY-LQ-2-72 <>	65.9758	52722.2	0.648947	13.3444	1.56796	1.66553	3.06864	0.161194	2.63782	0.859604	963.41	23.6053	995.483	19.4714	1066.85	31.544	1066.85	31.544	90.3041
LEARY-LQ-2-73 <>	285.092	4844.77	0.921002	17.3512	3.26973	0.260272	4.10837	0.0327533	2.48748	0.605468	207.757	5.08555	234.886	8.61534	515.81	71.8267	207.757	5.08555	NA
LEARY-LQ-2-75 <>	49.4304	1233.13	0.993919	19.1529	24.5393	0.142383	25.8244	0.0197784	8.04509	0.311531	126.255	10.0586	135.164	32.6931	294.687	567.747	126.255	10.0586	NA
LEARY-LQ-2-76 <>	112.744	7697.27	1.65105	13.3746	12.4831	0.155214	13.2032	0.015056	4.30068	0.32573	96.3339	4.11221	146.505	18.0145	1062.3	252.057	96.3339	4.11221	NA
LEARY-LQ-2-77 <>	61.2073	12053.1	0.761764	8.9314	0.819262	4.70432	4.49649	0.30473	4.42123	0.983261	1714.72	66.5688	1768.01	37.67	1831.53	14.8476	1831.53	14.8476	93.6223
LEARY-LQ-2-78 <>	90.5592	57665.5	1.71934	10.1142	0.767995	4.00137	6.98513	0.29352	6.94278	0.993937	1659.09	101.567	1634.47	56.8037	1602.92	14.326	1602.92	14.326	103.504
LEARY-LQ-2-79 <>	323.046	4121.98	0.745784	22.1106	7.9878	0.0923715	8.25784	0.0148128	2.09447	0.253635	94.7891	1.97081	89.7101	7.0904	-43.3792	194.4	94.7891	1.97081	NA
LEARY-LQ-2-80 <>	115.344	3126.94	1.21405	51.4506	59.8191	0.0383115	60.0492	0.0142961	5.25188	0.0874597	91.5063	4.77186	38.1742	22.5014	NA	NA	91.5063	4.77186	NA
LEARY-LQ-2-81 <>	198.046	9922.95	1.10823	22.5098	8.81334	0.143152	9.60633	0.0233704	3.82186	0.397848	148.922	5.62635	135.847	12.2152	-87.0472	216.349	148.922	5.62635	NA
LEARY-LQ-2-82 <>	185.81	1065.87	0.629711	15.1667	26.6773	0.134481	27.23	0.0147928	5.4582	0.200448	94.6621	5.12909	128.117	32.7864	804.265	568.151	94.6621	5.12909	NA
LEARY-LQ-2-83 <>	90.228	9925.23	0.544715	18.1351	5.03086	0.635572	5.21547	0.0835955	1.37536	0.263707	517.549	6.8399	499.561	20.5815	417.954	112.443	517.549	6.8399	123.829
LEARY-LQ-2-84 <>	169.044	18989.8	4.30522	14.0345	1.20455	1.57784	2.85506	0.160605	2.58852	0.906642	960.135	23.0911	961.519	17.7459	964.703	24.5768	964.703	24.5768	99.5265
LEARY-LQ-2-85 <>	94.052	18246.5	1.64107	8.15643	0.541398	5.91625	1.83029	0.349982	1.74838	0.95525	1934.51	29.2197	1963.62	15.8987	1994.43	9.62261	1994.43	9.62261	96.9959
LEARY-LQ-2-86 <>	119.695	44175.1	0.729864	12.8896	1.31975	2.11062	2.7812	0.19731	2.44813	0.880242	1160.86	26.0074	1152.28	19.1636	1136.2	26.2618	1136.2	26.2618	102.17
LEARY-LQ-2-87 <>	246.515	18985.3	1.01462	19.6719	4.07654	0.247821	4.45159	0.0353576	1.78845	0.401754	223.993	3.9372	224.805	8.97725	233.331	94.1289	223.993	3.9372	NA
LEARY-LQ-2-88 <>	44.318	76876.2	1.65592	4.29843	0.503392	18.4711	1.30223	0.575839	1.201	0.922264	2931.75	28.2913	3014.6	12.5442	3070.31	8.04557	3070.31	8.04557	95.4871
LEARY-LQ-2-89 <>	189.483	25222.8	1.51737	19.5991	5.09409	0.226523	5.47578	0.0321994	2.00861	0.366816	204.299	4.03921	207.325	10.269	241.851	117.444	204.299	4.03921	NA
LEARY-LQ-2-90 <>	98.4843	17341	1.22126	20.4972	11.2597	0.200446	12.3973	0.0297983	5.18766	0.418451	189.285	9.67672	185.504	21.022	137.615	265.191	189.285	9.67672	NA
LEARY-LQ-2-91 <>	75.048	4744.58	1.13429	22.2677	22.8358	0.159231	23.3638	0.025716	4.93911	0.2114	163.68	7.98259	150.03	32.5973	-60.6201	563.063	163.68	7.98259	NA
LEARY-LQ-2-93 <>	144.833	23007.2	1.23527	16.663	2.19283	0.785477	3.43846	0.0949258	2.64849	0.770255	584.603	14.8019	588.603	15.3605	604.036	47.4635	584.603	14.8019	96.7829
LEARY-LQ-2-94 <>	48.5386	27421.4	0.430862	12.8908	2.21432	1.96115	2.95311	0.183353	1.95388	0.661634	1085.27	19.516	1102.28	19.8617	1136.03	44.0853	1136.03	44.0853	95.5316
LEARY-LQ-2-95 <>	81.2094	23049.1	1.19604	16.6649	4.11681	0.679973	4.94559	0.0821852	2.74057	0.554145	509.153	13.4169	526.758	20.328	603.781	89.1306	509.153	13.4169	84.3275
LEARY-LQ-2-96 <>	118.363	3446.74	1.40313	23.7494	21.081	0.0912471	21.539	0.015717	4.41811	0.205122	100.53	4.40709	88.6644	18.2893	-220.147	535.215	100.53	4.40709	NA
LEARY-LQ-2-97 <>	108.848	65971.2	1.57563	12.1216	0.602882	2.29473	2.46613	0.201739	2.3913	0.969658	1184.66	25.8782	1210.67	17.4422	1257.37	11.798	1257.37	11.798	94.217
LEARY-LQ-2-98 <>	95.8289	5748.73	1.21854	19.5997	16.453	0.108261	17.2395	0.0153893	5.14787	0.298609	98.45	5.02957	104.373	17.1011	241.796	381.431	98.45	5.02957	NA
LEARY-LQ-2-100 <>	46.6804	2973.54	0.818987	22.1121	60.6521	0.0953516	61.1403	0.0152917	7.7107	0.126115	97.8307	7.48649	92.4765	54.0932	-43.5428	1618.86	97.8307	7.48649	NA
LEARY-LQ-2-101 <>	128.259	61072.8	1.68383	14.2376	1.38599	1.51567	3.09255	0.156508	2.76458	0.893948	937.343	24.1178	936.729	18.9211	935.301	28.4489	935.301	28.4489	100.218
LEARY-LQ-2-102 <>	41.9864	3511.55	1.21831	18.6769	155.843	0.186716	155.966	0.0252921	6.17539	0.0395945	161.015	9.82018	173.823	254.359	351.854	1220.64	161.015	9.82018	NA
LEARY-LQ-2-103 <>	322.198	6036.51	0.662312	30.1149	29.2104	0.0604758	29.3002	0.0132087	2.29254	0.0782432	84.5916	1.92663	59.6209	16.9676	-857.341	853.5	84.5916	1.92663	NA
LEARY-LQ-2-104 <>	135.545	17895.5	1.21293	21.7244	8.91493	0.240012	9.65276	0.0378164	3.70132	0.383447	239.284	8.6943	218.431	18.9731	-0.726918	215.265	239.284	8.6943	NA
LEARY-LQ-2-105 <>	53.9478	30752.7	1.45045	12.5158	2.06312	2.15532	2.20294	0.195646	0.772326	0.350589	1151.89	8.1468	1166.77	15.2803	1194.51	40.7255	1194.51	40.7255	96.4316
LEARY-LQ-2-106 <>	150.77	241886	1.34692	9.47554	0.380337	4.53199	1.24552	0.311453	1.18603	0.952236	1747.85	18.1575	1736.86	10.3611	1723.64	6.98618	1723.64	6.98618	101.405
LEARY-LQ-2-107 <>	90.9086	2978.22	1.48979	23.9618	25.481	0.0924973	25.9249	0.0160748	4.77703	0.184264	102.801	4.87189	89.827	22.2908	-242.594	652.647	102.801	4.87189	NA
LEARY-LQ-2-108 <>	49.7558	42186.6	0.397903	16.5002	5.8082	0.680733	6.19902	0.0814639	2.16624	0.349449	504.855	10.5191	527.218	25.499	625.235	125.309	504.855	10.5191	80.7464
LEARY-LQ-2-109 <>	55.9577	7496.49	0.56175	19.1862	9.3505	0.619685	9.49111	0.0862302	1.62764	0.171491	533.203	8.32943	489.65	36.8874	290.689	214.033	533.203	8.32943	183.427
LEARY-LQ-2-110 <>	42.9638	12160.9	1.37001	12.8541	3.80443	1.69789	4.36805	0.158289	2.14622	0.491344	947.262	18.9072	1007.74	27.9198	1141.69	75.6655	1141.69	75.6655	82.9703

## Sheet: DZ Systematic Uncertainty
Sample	206/238 Age (% 2-sigma)	206/207 Age (% 2-sigma)
1LQ-51	1.4	0.8
1LQ-660	1.2	0.8
1LQ-1073	1.2	0.9
1LQ-BT0	1	0.8
1LQ-BT1	0.8	0.7
4LQ-173	0.8	0.8
5LQ-196	0.9	0.9
7LQ-268	1.1	0.8
8LQ-5	1	0.7
8LQ-21	0.8	0.8
8LQ21a	0.9	0.9
9LQ-500	1.3	0.9
14LQ-50	0.9	0.8
LiuquTuff	1.2	1.1
LQ-1	1	1.6
LQ-2	1.2	1.1

## Sheet: Detrital zircon Hf
Hf isotopic data
Sample	(176Yb + 176Lu) / 176Hf (%)	Volts Hf	176Hf/177Hf	± (1s)	176Lu/177Hf	176Hf/177Hf (T)	E-Hf (0)	E-Hf (0) ± (1s)	E-Hf (T)	Age (Ma)
Sample:	1LQ-51		N29.12652	E88.65069
1LQ51-100	12.7467	3.52912	0.282918	2.76283e-05	0.000885755	0.282917	4.71534	0.977006	6.9004	101
1LQ51-103	15.2788	4.41725	0.282366	2.44968e-05	0.000872346	0.282363	-14.8133	0.866269	-10.5101	199
1LQ51-12	55.5147	3.52021	0.28232	4.36674e-05	0.00375425	0.28229	-16.4414	1.54419	-8.08094	423
1LQ51-16	13.9248	3.61021	0.283035	2.89606e-05	0.000951439	0.283033	8.8411	1.02412	11.0227	101
1LQ51-18	13.3807	3.47901	0.282998	3.56521e-05	0.00093089	0.282996	7.51734	1.26075	9.50531	92
1LQ51-2	4.71197	3.2761	0.283029	3.86526e-05	0.000346611	0.283026	8.63426	1.36686	20.4187	533
1LQ51-21	12.6583	3.95218	0.282928	2.85363e-05	0.000873686	0.282926	5.04747	1.00911	7.06009	93
1LQ51-23	16.4039	3.59334	0.282828	3.41766e-05	0.00111292	0.282826	1.51816	1.20857	3.57983	96
1LQ51-28	35.9631	2.17023	0.282876	3.75602e-05	0.00184994	0.282868	3.22223	1.32822	8.2899	241
1LQ51-29	12.2919	3.53316	0.281664	3.75738e-05	0.000746667	0.281638	-39.6529	1.3287	0.0534797	1800
1LQ51-36	11.0584	3.46367	0.282006	3.17984e-05	0.000618214	0.281993	-27.5438	1.12447	-3.48534	1094
1LQ51-37	13.8852	2.75627	0.282254	3.18101e-05	0.00076442	0.282246	-18.7686	1.12489	-5.67398	601
1LQ51-38	5.98819	2.94269	0.282204	3.26605e-05	0.000314495	0.282201	-20.544	1.15496	-7.42762	594
1LQ51-44	10.4195	2.70098	0.282495	6.81924e-05	0.000653012	0.282494	-10.2587	2.41146	-8.40989	85
1LQ51-45	5.82024	3.82217	0.281552	3.12436e-05	0.00035714	0.281544	-43.6049	1.10485	-17.2185	1191
1LQ51-46	25.4639	2.92371	0.282907	3.13756e-05	0.0017112	0.282903	4.30138	1.10952	6.38902	99
1LQ51-47	12.0252	3.37041	0.282944	3.01907e-05	0.000804221	0.282942	5.60951	1.06762	7.93052	107
1LQ51-48	3.29173	3.33417	0.282006	2.8776e-05	0.000181837	0.282003	-27.5444	1.01759	-4.58743	1031
1LQ51-51	12.0172	3.21728	0.282263	3.03628e-05	0.000687259	0.282249	-18.4536	1.07371	5.62117	1096
1LQ51-52	10.3587	3.32492	0.282385	2.73686e-05	0.000581248	0.282378	-14.1276	0.967824	0.902414	685
1LQ51-55	6.14519	3.58982	0.282382	3.00965e-05	0.000401133	0.282378	-14.2467	1.06429	-2.02115	555
1LQ51-56	13.1374	3.50181	0.282053	3.52208e-05	0.000814382	0.282034	-25.8956	1.2455	0.7952	1219
1LQ51-58	10.04	2.81552	0.280441	3.98416e-05	0.000592887	0.2804	-82.8848	1.4089	-1.49332	3611
1LQ51-6	10.4773	3.04286	0.283137	3.55107e-05	0.000685596	0.283136	12.4413	1.25575	14.6196	100
1LQ51-60	7.11666	3.57279	0.282069	2.81635e-05	0.000415906	0.28206	-25.3288	0.995934	0.587989	1170
1LQ51-65	18.5948	2.63388	0.282952	3.65861e-05	0.0012726	0.28295	5.9139	1.29378	7.85937	91
1LQ51-67	11.1531	3.31737	0.282103	3.18413e-05	0.000657791	0.282088	-24.1338	1.12599	1.30706	1157
1LQ51-67	5.84406	3.56516	0.281281	3.0692e-05	0.000355542	0.281273	-53.1777	1.08535	-27.5785	1157
1LQ51-73	7.67981	3.73246	0.282414	3.3143e-05	0.00045734	0.282409	-13.13	1.17202	-0.658137	567
1LQ51-74	12.8155	3.18566	0.282264	3.5326e-05	0.000817669	0.282256	-18.4383	1.24922	-8.22971	470
1LQ51-75	6.75622	3.41758	0.281811	2.98898e-05	0.00038718	0.281808	-34.4294	1.05698	-23.1529	513
1LQ51-78	5.12718	3.19738	0.281689	3.19629e-05	0.00026858	0.281686	-38.7631	1.13029	-25.9639	580
1LQ51-8	9.26311	3.12651	0.283089	4.0492e-05	0.000659568	0.283088	10.7472	1.4319	12.9924	103
1LQ51-83	27.6271	4.08083	0.281568	2.62841e-05	0.00160797	0.28151	-43.0401	0.929473	-2.43961	1889
1LQ51-85	10.575	3.44801	0.282102	3.28107e-05	0.000660216	0.282087	-24.1395	1.16027	2.36963	1205
1LQ51-86	11.254	3.31551	0.28311	3.44026e-05	0.000709552	0.283109	11.4797	1.21657	13.2859	83
1LQ51-87	10.8118	3.21698	0.281683	3.52877e-05	0.000659591	0.281664	-38.9742	1.24786	-6.02337	1495
1LQ51-87	6.25504	3.55607	0.282036	3.69606e-05	0.000364777	0.282026	-26.4797	1.30702	6.80938	1495
1LQ51-88	18.8325	3.67643	0.28202	3.59562e-05	0.0010796	0.281999	-27.0444	1.2715	-4.04666	1061
1LQ51-89	12.3069	3.53556	0.282109	2.50794e-05	0.000728716	0.282093	-23.9084	0.886873	1.78944	1171
1LQ51-9	66.9225	2.52933	0.283099	3.81783e-05	0.00419846	0.283092	11.1061	1.35008	12.8961	92
1LQ51-90	13.6139	3.25144	0.282099	2.71994e-05	0.000810835	0.282082	-24.244	0.961841	0.745423	1142
1LQ51-92	8.48361	3.66936	0.282112	2.84185e-05	0.000510318	0.282102	-23.7915	1.00495	-1.23065	1023
1LQ51-93	5.2179	3.25667	0.280954	3.30926e-05	0.000321353	0.280938	-64.7584	1.17024	-5.61165	2628
1LQ51-96	5.8648	3.53959	0.281854	2.55367e-05	0.000337699	0.281847	-32.9217	0.903045	-7.45829	1148
1LQ51-98	2.69316	4.18157	0.282394	3.5016e-05	0.000141027	0.282393	-13.8097	1.23825	-1.15246	570
1LQ51-99	12.2019	3.47779	0.283038	3.88845e-05	0.000734681	0.283037	8.93844	1.37506	10.8951	90
Sample:	1LQ-660		N29.12032	N88.55923
1LQ660-10	13.8438	3.63748	0.282163	3.09462e-05	0.000901976	0.282158	-21.9823	1.09434	-15.1293	317
1LQ660-104	8.0212	3.51063	0.282233	3.30332e-05	0.00047822	0.282229	-19.5127	1.16814	-8.40476	506
1LQ660-12	13.5689	2.57594	0.2831	3.14018e-05	0.00104284	0.283098	11.1415	1.11045	13.4254	106
1LQ660-13	7.54628	3.54263	0.281979	2.76805e-05	0.000435883	0.281975	-28.5097	0.978854	-17.3314	509
1LQ660-14	15.2203	3.21669	0.283046	3.24416e-05	0.00104471	0.283044	9.22249	1.14722	11.0961	87
1LQ660-17	40.4727	3.64636	0.281822	4.09586e-05	0.00180376	0.281804	-34.0625	1.4484	-23.0777	522
1LQ660-22	17.15	2.66499	0.283022	3.22535e-05	0.00118019	0.283019	8.36552	1.14057	10.4459	97
1LQ660-23	18.1529	2.9179	0.283081	3.06222e-05	0.001259	0.283078	10.4645	1.08288	13.0545	121
1LQ660-25	16.8243	3.53256	0.282465	2.90048e-05	0.000942968	0.282462	-11.3121	1.02568	-7.01667	199
1LQ660-31	8.07166	3.24099	0.281592	3.67696e-05	0.000484281	0.281576	-42.1819	1.30027	-3.05226	1761
1LQ660-32	16.3902	2.96167	0.282372	3.09052e-05	0.000958745	0.282368	-14.5986	1.09289	-10.0039	213
1LQ660-33	12.3301	2.94207	0.282896	3.47157e-05	0.000794753	0.282894	3.91029	1.22764	5.75382	85
1LQ660-34	8.9057	2.9352	0.282102	3.71809e-05	0.000533389	0.282096	-24.1591	1.31481	-11.6637	570
1LQ660-35	10.9963	2.79674	0.282492	3.83724e-05	0.000776007	0.28249	-10.3503	1.35694	-6.1629	193
1LQ660-37	14.9076	2.62951	0.283067	3.20019e-05	0.00110288	0.283065	9.96672	1.13167	12.0093	95
1LQ660-38	17.6386	1.76368	0.281843	6.8509e-05	0.00102986	0.281833	-33.3032	2.42265	-22.2011	515
1LQ660-40	16.3447	3.06504	0.283035	2.89489e-05	0.00108159	0.283033	8.85343	1.02371	11.2202	110
1LQ660-44	29.8828	2.10523	0.282672	5.28268e-05	0.00187622	0.282669	-3.99075	1.86809	-2.1675	87
1LQ660-47	17.1174	3.02484	0.282261	5.15843e-05	0.000939459	0.282252	-18.5154	1.82415	-7.03851	530
1LQ660-50	25.9309	2.79576	0.28311	3.06415e-05	0.00191831	0.283105	11.4969	1.08356	14.7488	155
1LQ660-54	4.75352	4.64447	0.281933	3.07718e-05	0.000283893	0.28193	-30.1319	1.08817	-17.8384	557
1LQ660-59	12.6907	3.10218	0.281899	3.54664e-05	0.000702639	0.281892	-31.345	1.25418	-20.3696	504
1LQ660-62	6.30334	4.0221	0.282334	2.49861e-05	0.000357963	0.28233	-15.9596	0.883572	-4.07532	539
1LQ660-63	8.83421	2.44534	0.282333	4.27117e-05	0.000520009	0.28233	-15.9803	1.51039	-8.95502	321
1LQ660-67	27.2987	2.70071	0.282266	4.26448e-05	0.00157842	0.282261	-18.3393	1.50803	-14.1306	199
1LQ660-73	9.76226	2.82922	0.28225	3.15303e-05	0.000583082	0.282244	-18.919	1.11499	-6.87655	550
1LQ660-84	19.0885	3.49367	0.282928	3.33259e-05	0.00139527	0.282925	5.05529	1.17849	7.12112	97
1LQ660-87	7.60933	4.03394	0.282292	3.55325e-05	0.000466507	0.28229	-17.4491	1.25652	-14.1241	152
1LQ660-9	12.6769	3.71538	0.282373	2.68882e-05	0.000766488	0.282372	-14.5544	0.950836	-11.7363	130
1LQ660-92	30.0231	2.86493	0.282354	2.72032e-05	0.00174692	0.28235	-15.2513	0.961975	-12.644	124
Sample:	1LQ-1073		N29.11846	E88.65651
1LQ1073-1	57.666	4.50218	0.283087	2.67695e-05	0.00381285	0.28308	10.6837	0.946638	12.6155	98
1LQ1073-10	11.9493	2.78932	0.282366	3.77944e-05	0.000703484	0.282364	-14.8152	1.33651	-12.1875	121
1LQ1073-100	8.23457	3.86003	0.281736	3.85683e-05	0.000510139	0.281721	-37.1049	1.36387	-3.72724	1507
1LQ1073-102	5.86131	5.09132	0.283074	2.88152e-05	0.000432644	0.283073	10.2251	1.01898	12.0682	84
1LQ1073-105	25.3331	2.89497	0.282069	3.43685e-05	0.00145898	0.282067	-25.303	1.21536	-23.4811	86
1LQ1073-17	19.9482	3.51527	0.282486	2.44922e-05	0.00114234	0.282465	-10.5869	0.866106	10.0174	952
1LQ1073-18	32.059	3.87891	0.28174	3.19398e-05	0.00189951	0.281721	-36.9587	1.12947	-25.715	536
1LQ1073-22	11.8311	3.5852	0.282601	3.26371e-05	0.000720738	0.282596	-6.52375	1.15413	0.99027	345
1LQ1073-26	8.03399	3.13012	0.282147	3.21727e-05	0.000478052	0.282139	-22.5602	1.13771	-3.80934	851
1LQ1073-3	22.9816	3.32556	0.282014	3.54599e-05	0.00150104	0.281971	-27.2545	1.25395	5.21902	1510
1LQ1073-31	16.2398	2.97513	0.281886	3.11467e-05	0.00100391	0.281864	-31.8043	1.10143	-6.51917	1163
1LQ1073-32	16.7133	3.00376	0.282821	3.47577e-05	0.00118739	0.282816	1.28494	1.22912	6.78016	256
1LQ1073-36	14.9325	4.26384	0.280994	2.61179e-05	0.000884215	0.280948	-63.3473	0.923596	-3.14402	2718
1LQ1073-38	2.21058	3.50272	0.281705	2.91471e-05	0.00012362	0.281704	-38.1851	1.03072	-25.9538	552
1LQ1073-47	7.33749	3.43877	0.281718	2.94289e-05	0.000478706	0.281713	-37.727	1.04068	-25.493	558
1LQ1073-48	25.56	2.81247	0.282486	2.65828e-05	0.00182703	0.282451	-10.5894	0.940034	10.6514	1002
1LQ1073-49	2.14148	4.60072	0.280798	2.99772e-05	0.000147443	0.280791	-70.2754	1.06007	-15.3859	2433
1LQ1073-5	27.2215	4.49601	0.283077	3.21549e-05	0.00212814	0.283074	10.3373	1.13708	12.3156	95
1LQ1073-53	8.07575	3.01345	0.281933	6.44989e-05	0.000491791	0.281918	-30.1219	2.28084	5.26338	1594
1LQ1073-54	12.8166	2.58441	0.28185	3.86321e-05	0.000782848	0.281836	-33.069	1.36613	-13.0125	919
1LQ1073-57	6.49545	3.63641	0.281698	3.07692e-05	0.000400956	0.281685	-38.4479	1.08808	-1.86181	1644
1LQ1073-6	20.4889	3.59	0.283008	4.40342e-05	0.00122245	0.283006	7.8797	1.55716	9.80714	90
1LQ1073-60	26.5204	4.13847	0.282389	2.95612e-05	0.00160693	0.282378	-13.9967	1.04536	-6.24455	366
1LQ1073-61	6.59608	3.38768	0.281089	3.61081e-05	0.000394137	0.28107	-59.9867	1.27687	-4.10959	2491
1LQ1073-63	9.52432	3.5668	0.281954	3.62043e-05	0.000540015	0.281943	-29.3848	1.28028	-5.98759	1062
1LQ1073-65	10.267	3.64347	0.282383	3.83078e-05	0.000576507	0.282373	-14.2302	1.35466	5.54708	899
1LQ1073-66	12.0161	3.63546	0.28212	3.62054e-05	0.000741689	0.282099	-23.5308	1.28031	8.22533	1443
1LQ1073-68	7.12303	3.33031	0.281163	3.09253e-05	0.000424566	0.281142	-57.3723	1.0936	-1.02417	2513
1LQ1073-71	11.3568	3.33623	0.282156	6.53361e-05	0.000664952	0.282148	-22.2522	2.31045	-9.03453	605
1LQ1073-72	30.4376	2.87811	0.282162	6.98987e-05	0.00187296	0.282121	-22.0191	2.4718	2.85144	1174
1LQ1073-76	8.27031	3.54861	0.283063	3.33004e-05	0.000499566	0.283063	9.84245	1.17759	11.6379	82
1LQ1073-78	5.31929	3.53727	0.2818	2.48104e-05	0.000297646	0.281797	-34.8472	0.87736	-23.6737	507
1LQ1073-8	39.9657	2.52075	0.282775	3.50085e-05	0.00259476	0.28277	-0.370208	1.23799	1.35089	84
1LQ1073-80	22.6309	2.93483	0.283042	3.46585e-05	0.0013713	0.283039	9.07828	1.22561	11.1679	98
1LQ1073-82	13.1678	2.42887	0.282512	4.05691e-05	0.000861039	0.28251	-9.66289	1.43463	-7.02478	122
1LQ1073-86	14.0564	3.88335	0.282093	3.3728e-05	0.000866402	0.282075	-24.4702	1.19271	0.0335759	1122
1LQ1073-88	13.0585	3.74718	0.281964	3.89649e-05	0.000813115	0.281944	-29.0254	1.3779	-0.319809	1310
1LQ1073-9	2.6795	3.21423	0.282549	2.67272e-05	0.000235736	0.282547	-8.33397	0.945141	3.42497	531
1LQ1073-92	16.4552	3.47595	0.282303	5.67627e-05	0.001166	0.28229	-17.0441	2.00727	-4.43265	586
1LQ1073-95	22.0831	3.45464	0.282373	3.14841e-05	0.00140885	0.282367	-14.566	1.11336	-9.77887	225
1LQ1073-99	4.90454	4.59803	0.282388	3.35007e-05	0.000278103	0.282385	-14.0225	1.18467	-0.794012	598

## Sheet: Ar-Ar Data
LIUQU intrusion 1					mica		1.508	mg
SPLIT ID	RL3								J-factor	J error				Sample Location:
Lab ID	2327								0.000121071	1.94403e-06				N29.144714
Step	Temp	40Ar/39Ar	37Ar/39Ar	36Ar/39Ar	39ArK	K/Ca	40Ar*	39Ar	Age	±1s				E88.129478
ID				(x 10-3)	(x 10-16 mol)		(%)	(%)	(Ma)	(Ma)
A	300	191.495	34.2086	0.396871	0.0649654	0.0149145	40.1792	14.9813	19.0319	Age_Er
B	400	225.786	232.474	0.601414	0.0373773	0.00219467	29.4567	8.61936	19.1705	2.38517
C	500	221.528	170.897	0.566878	0.0211815	0.00298545	30.5059	4.88455	18.5309	3.91724
D	600	346.216	100.608	0.956505	0.0196179	0.00507122	20.6674	4.52397	18.5848	6.19824
E	700	263.032	74.3388	0.65274	0.0294481	0.00686323	28.9103	6.79085	19.3644	4.36405
F	800	265.122	1.30128	0.609149	0.0758664	0.392079	32.1427	17.4951	20.5855	3.3267
G	900	197.584	6.84077	0.379259	0.0820492	0.0745828	43.5524	18.9209	20.8663	1.76614
H	1000	90.1832	5.11914	0.121422	0.0462894	0.099666	60.664	10.6745	13.2771	1.67782
I	1100	74.5312	5.02691	0.0842768	0.0298343	0.101495	67.1169	6.87992	12.1427	1.59046
J	1200	136.173	36.5098	0.0802748	0.00424511	0.0139744	84.6895	0.978941	28.4977	2.37841
L	1400	28.8287	43.0555	-0.125461	0.00444224	0.0118499	240.498	1.0244	17.263	16.7594
M	1500	29.3896	4.22681	0.0181083	0.0183266	0.120707	82.92	4.22619	5.9214	16.5273
total gas age			n=	12	0.433643			100	18	0.9
plateau	MSWD =	0.13	n=	7	0.330506	steps	E-O	76.216	20.1	1
Notes:
Isotopic ratios corrected for blank, radioactive decay, mass discrimination, and interferring reactions.
Individual analyses show analytical error only; plateau and total gas age errors include error in J and irradiation parameters. All at one sigma.
Analyses in italics are excluded from plateau age calculations.
n= number of heating steps
K/Ca = molar ratio calculated from reactor produced 39ArK and 37ArCa.
LIUQU intrusion 2					mica		1.508	mg
SPLIT ID	RL2								J-factor	J error				Sample Location:
Lab ID	2326								0.000121071	1.94403e-06				N29.144714
Step	Temp	40Ar/39Ar	37Ar/39Ar	36Ar/39Ar	39ArK	K/Ca	40Ar*	39Ar	Age	±1s				E88.129478
ID				(x 10-3)	(x 10-16 mol)		(%)	(%)	(Ma)	(Ma)
B	400	260.432	5.21373	0.978169	0.0135797	0.0978578	-10.8311	5.52372	-6.85426	Age_Er
C	450	151.4	0.993111	0.519715	0.0116359	0.513743	-1.38949	4.73308	-0.508762	16.1566
D	500	184.347	2.71786	0.69491	0.00932907	0.187723	-11.2779	3.79473	-5.0405	17.3478
E	550	1424.51	-0.232562	5.06573	0.00467782	-2.19384	-5.08608	1.90277	-17.5911	21.6639
F	600	1645.2	-1.58363	6.41539	0.00148933	-0.322173	-15.2368	0.605804	-61.5494	47.4224
G	650	410.527	2.13232	1.27922	0.00737436	0.239271	7.95991	2.99962	7.89105	268.951
H	700	390.978	-2.15449	1.01741	0.0112833	-0.23681	23.0588	4.58962	21.623	27.0987
I	750	356.183	-0.0719068	0.926484	0.0159697	-7.09535	23.1323	6.49591	19.8002	20.0855
J	800	412.812	0.700477	0.990274	0.0236913	0.728367	29.1265	9.63678	28.8378	14.3988
K	850	399.042	-0.0473027	0.909163	0.0284822	-10.7859	32.6707	11.5855	31.2307	10.6951
L	900	290.315	-0.310126	0.674288	0.0395367	-1.64515	31.3569	16.0821	21.8603	9.32066
M	950	211.048	-0.298536	0.415818	0.0365934	-1.70902	41.7659	14.8849	21.1709	6.06656
N	1000	167.63	-1.01621	0.275535	0.0211232	-0.502064	51.3787	8.59217	20.6779	6.59297
O	1050	129.477	-0.283332	0.1486	0.0210768	-1.80073	66.0682	8.5733	20.549	11.631
total gas age			n=	14	0.245843			100	18	4
plateau	MSWD =	0.13	n=	14	0.245843	steps	E-O	100	20	3
Notes:
Isotopic ratios corrected for blank, radioactive decay, mass discrimination, and interferring reactions.
Individual analyses show analytical error only; plateau and total gas age errors include error in J and irradiation parameters. All at one sigma.
Analyses in italics are excluded from plateau age calculations.
n= number of heating steps
K/Ca = molar ratio calculated from reactor produced 39ArK and 37ArCa.

## Sheet: Fission Track Data
Sample Number		5LQ-196			Mineral	Zircon			Sample Location:
Position (#)		52			Glass (U ppm)	49.4			N29.17325
Area of Graticule Square		6.4e-07			Irradiation	UA-Z7			E88.15549
No. of Crystals		114			Analyst	RJL
Zeta Factor ± Error		114.359	2.01935		Count Date	4.10.2015
Rho d (% Relative Error)		327247	2.1851		Locality
N d		2094.38			Rock Type
N s	N i	N g	ρ s	ρ i	ρ s / ρ i	U ppm	Grain Age (Ma)	± 1σ	50% Age	"+95%"	"-95%"
57	47	28	3.1808e+06	2.62277e+06	1.21277	395.923	22.6531	4.50847	23.0809	10.9602	7.94635
40	3	4	15625000	1171875	13.3333	176.902	244.783	146.691	278.445	872.997	199.473
44	3	4	17187500	1171875	14.6667	176.902	268.758	160.548	305.196	946.669	217.817
26	8	3	1.35417e+07	4.16667e+06	3.25	628.984	60.5282	24.5308	64.7364	88.8328	38.0543
32	7	6	8.33333e+06	1.82292e+06	4.57143	275.18	84.9769	35.5379	91.0004	134.623	54.0207
18	8	4	7031250	3125000	2.25	471.738	41.9646	17.8705	45.3849	65.5572	27.9898
24	5	10	3750000	781250	4.8	117.934	89.1965	43.9202	98.063	196.492	64.5576
58	4	6	1.51042e+07	1.04167e+06	14.5	157.246	265.766	137.592	292.214	662.62	192.538
28	4	6	7.29167e+06	1.04167e+06	7	157.246	129.669	69.4069	144.44	350.024	98.7787
15	4	2	11718750	3125000	3.75	471.738	69.79	39.3219	79.3405	204.755	57.0251
36	3	4	14062500	1171875	12	176.902	220.719	132.781	251.583	797.842	181.025
137	14	10	21406250	2187500	9.78571	330.216	180.556	50.9145	185.764	149.165	81.1364
24	5	4	9375000	1953125	4.8	294.836	89.1965	43.9202	98.063	196.492	64.5576
84	7	6	2.1875e+07	1.82292e+06	12	275.18	220.719	87.0516	233.259	318.052	129.773
43	4	4	16796875	1562500	10.75	235.869	198.077	103.692	218.75	510.035	146.055
18	4	3	9.375e+06	2.08333e+06	4.5	314.492	83.6578	46.3032	94.4213	238.863	66.7436
15	9	3	7.8125e+06	4.6875e+06	1.66667	707.607	31.1111	13.1467	33.7298	46.5904	20.9563
21	6	30	1093750	312500	3.5	47.1738	65.1607	30.2191	71.1069	124.223	45.5898
29	3	2	22656250	2343750	9.66667	353.803	178.389	108.305	204.304	662.599	148.479
211	74	21	1.56994e+07	5.50595e+06	2.85135	831.157	53.1342	7.33216	53.5414	16.5831	12.9119
48	12	6	1.25e+07	3.125e+06	4	471.738	74.4159	24.1084	77.5746	75.3965	38.5276
16	4	6	4.16667e+06	1.04167e+06	4	157.246	74.4159	41.6522	84.3713	216.165	60.2716
8	2	2	6250000	1562500	4	235.869	74.4159	58.8681	95.8892	589.816	80.9698
42	4	4	16406250	1562500	10.5	235.869	193.539	101.419	213.822	499.606	142.929
62	11	9	1.07639e+07	1.90972e+06	5.63636	288.284	104.613	34.3518	108.985	109.396	54.1586
24	4	6	6.25e+06	1.04167e+06	6	157.246	111.304	60.1924	124.479	306.012	86.0219
43	5	9	7.46528e+06	868056	8.6	131.038	158.945	75.2343	172.593	328.017	109.035
70	16	10	10937500	2500000	4.375	377.39	81.3485	22.6574	83.8474	65.4239	36.9529
21	7	12	2.73437e+06	911458	3	137.59	55.8923	24.4439	60.5017	93.9482	37.5536
19	3	3	9.89583e+06	1.5625e+06	6.33333	235.869	117.432	73.0303	136.157	460.628	101.366
119	6	8	2.32422e+07	1171875	19.8333	176.902	360.827	151.315	383.277	573.605	219.815
46	5	2	35937500	3906250	9.2	589.672	169.89	80.142	184.283	348.256	115.979
39	4	3	2.03125e+07	2.08333e+06	9.75	314.492	179.906	94.5884	199.017	468.118	133.529
94	12	9	1.63194e+07	2.08333e+06	7.83333	314.492	144.934	44.6154	150.05	137.213	70.4612
81	5	9	14062500	868056	16.2	131.038	296.219	136.754	319.121	574.615	195.621
53	1	6	1.38021e+07	260417	53	39.3115	922.459	931.481	1306.58	11409.8	1138.34
112	15	9	1.94444e+07	2.60417e+06	7.46667	393.115	138.222	38.2014	142.148	110.772	61.4714
73	11	12	9.50521e+06	1.43229e+06	6.63636	216.213	122.997	39.9309	127.927	126.62	62.7734
44	6	8	8593750	1171875	7.33333	176.902	135.78	59.2135	145.739	236.718	87.7413
35	6	9	6.07639e+06	1.04167e+06	5.83333	157.246	108.238	47.9224	116.638	193.276	71.368
29	1	2	22656250	781250	29	117.934	521.008	530.117	754.6	8851.9	665.252
213	72	21	1.58482e+07	5.35714e+06	2.95833	808.693	55.1193	7.67189	55.547	17.3958	13.4956
32	7	9	5.55556e+06	1.21528e+06	4.57143	183.454	84.9769	35.5379	91.0004	134.623	54.0207
98	31	12	1.27604e+07	4.03646e+06	3.16129	609.328	58.8836	12.246	59.9225	31.1203	20.8981
106	57	21	7.8869e+06	4.24107e+06	1.85965	640.216	34.7037	5.78284	35.1261	13.5846	10.1865
54	9	6	1.40625e+07	2.34375e+06	6	353.803	111.304	40.1959	116.929	136.668	62.1885
31	19	4	12109375	7421875	1.63158	1120.38	30.4577	8.91525	31.664	25.2815	14.9752
92	16	9	1.59722e+07	2.77778e+06	5.75	419.323	106.705	29.0579	109.73	83.4269	47.1803
59	10	4	23046875	3906250	5.9	589.672	109.465	37.5607	114.449	123.198	58.6816
59	8	8	1.15234e+07	1562500	7.375	235.869	136.543	51.5869	143.956	182.099	78.6313
200	7	16	19531250	683594	28.5714	103.193	513.607	198.02	539.731	683.43	289.906
221	18	15	2.30208e+07	1875000	12.2778	283.043	225.74	55.6941	230.591	152.646	90.1148
89	20	12	1.15885e+07	2.60417e+06	4.45	393.115	82.7342	20.6048	84.749	56.5238	34.114
52	4	6	1.35417e+07	1.04167e+06	13	157.246	238.776	124.076	262.928	602.439	174.036
121	6	8	2.36328e+07	1171875	20.1667	176.902	366.722	153.726	389.493	582.025	223.239
98	8	12	1.27604e+07	1.04167e+06	12.25	157.246	225.238	83.0616	236.343	287.594	125.438
22	9	12	2.86458e+06	1.17187e+06	2.44444	176.902	45.5784	18.08	48.7416	63.1315	28.5315
133	18	10	20781250	2812500	7.38889	424.564	136.797	34.5704	140.033	96.0412	56.3876
50	15	9	8.68056e+06	2.60417e+06	3.33333	393.115	62.0727	18.3567	64.3128	54.1843	29.9424
65	28	20	5078125	2187500	2.32143	330.216	43.2923	9.86155	44.2589	25.6427	16.8246
35	6	4	13671875	2343750	5.83333	353.803	108.238	47.9224	116.638	193.276	71.368
68	18	12	8.85417e+06	2.34375e+06	3.77778	353.803	70.3041	18.7398	72.3169	52.7801	30.8922
25	6	4	9765625	2343750	4.16667	353.803	77.498	35.2983	84.1483	144.147	53.0017
56	9	6	1.45833e+07	2.34375e+06	6.22222	353.803	115.39	41.5656	121.167	141.175	64.2634
15	4	2	11718750	3125000	3.75	471.738	69.79	39.3219	79.3405	204.755	57.0251
46	5	4	17968750	1953125	9.2	294.836	169.89	80.142	184.283	348.256	115.979
73	20	25	4562500	1250000	3.65	188.695	67.9387	17.2527	69.708	47.504	28.655
61	13	9	1.05903e+07	2.25694e+06	4.69231	340.7	87.2088	26.7528	90.4477	81.4474	42.9006
209	12	15	2.17708e+07	1250000	17.4167	188.695	317.926	94.7971	327.752	283.245	147.644
29	4	4	11328125	1562500	7.25	235.869	134.253	71.7055	149.42	360.936	101.957
24	3	2	18750000	2343750	8	353.803	147.983	90.7157	170.32	562.952	125.019
44	62	24	2.86458e+06	4.03646e+06	0.709677	609.328	13.2657	2.64135	13.5392	6.28942	4.7323
18	4	4	7031250	1562500	4.5	235.869	83.6578	46.3032	94.4213	238.863	66.7436
129	37	18	1.11979e+07	3.21181e+06	3.48649	484.842	64.9104	12.2418	65.8333	30.2023	21.0327
18	6	4	7031250	2343750	3	353.803	55.8923	26.3946	61.3087	109.168	39.9974
65	5	12	8.46354e+06	651042	13	98.2787	238.776	111.018	257.83	473.306	159.517
25	3	3	1.30208e+07	1.5625e+06	8.33333	235.869	154.075	94.241	177.131	583.092	129.726
51	17	15	5312500	1.77083e+06	3	267.318	55.8923	15.7315	57.743	45.1149	25.9368
98	9	8	19140625	1.75781e+06	10.8889	265.353	200.597	70.0954	209.526	233.7	107.289
178	10	40	6953125	390625	17.8	58.9672	324.75	105.934	336.816	333.658	162.272
10	5	10	1562500	781250	2	117.934	37.3153	20.4653	42.594	95.4564	30.9497
106	8	10	16562500	1250000	13.25	188.695	243.282	89.4614	255.132	308.649	134.909
80	6	8	15625000	1171875	13.3333	176.902	244.783	103.84	260.85	403.758	152.051
45	8	6	1.17187e+07	2.08333e+06	5.625	314.492	104.404	40.1664	110.466	143.014	61.5486
92	11	15	9.58333e+06	1.14583e+06	8.36364	172.971	154.629	49.5218	160.514	156.011	77.544
39	11	4	15234375	4296875	3.54545	648.64	66.0027	22.6091	69.1995	72.848	35.9638
145	31	15	1.51042e+07	3.22917e+06	4.67742	487.462	86.9339	17.3746	88.2718	43.874	29.48
73	6	8	1.42578e+07	1171875	12.1667	176.902	223.732	95.2254	238.627	372.084	139.684
157	15	25	9812500	937500	10.4667	141.521	192.934	52.4217	198.058	150.625	83.9003
108	25	25	6750000	1562500	4.32	235.869	80.3322	17.9715	81.9076	47.185	30.177
53	9	12	6.90104e+06	1.17187e+06	5.88889	176.902	109.26	39.5106	114.809	134.411	61.1501
34	10	4	13281250	3906250	3.4	589.672	63.3081	22.8437	66.7433	76.0408	36.084
48	34	16	4687500	3.32031e+06	1.41176	501.221	26.3626	5.95553	26.9918	15.1433	10.3394
183	20	70	4.08482e+06	446429	9.15	67.3911	168.978	40.0781	172.413	108.299	65.6304
42	4	6	1.09375e+07	1.04167e+06	10.5	157.246	193.539	101.419	213.822	499.606	142.929
55	5	9	9.54861e+06	868056	11	131.038	202.612	94.8108	219.226	408.154	136.695
35	5	9	6.07639e+06	868056	7	131.038	129.669	62.1008	141.317	273.356	90.4186
122	11	12	1.58854e+07	1.43229e+06	11.0909	216.213	204.26	64.5588	211.634	201.53	100.608
75	20	18	6.51042e+06	1.73611e+06	3.75	262.077	69.79	17.6725	71.59	48.6353	29.3394
211	19	24	1.3737e+07	1.23698e+06	11.1053	186.73	204.52	49.3229	208.749	134.026	80.242
205	18	25	12812500	1125000	11.3889	169.826	209.66	51.8766	214.22	142.512	84.043
40	8	15	4.16667e+06	833333	5	125.797	92.8864	36.0693	98.4635	128.889	55.4055
153	28	18	13281250	2.43056e+06	5.46429	366.907	101.444	21.0455	103.098	53.9239	35.4407
81	20	25	5062500	1250000	4.05	188.695	75.3407	18.9306	77.2329	52.0225	31.3889
82	23	18	7.11806e+06	1.99653e+06	3.56522	301.388	66.3687	15.7704	67.8816	42.2132	26.4303
154	7	24	1.0026e+07	455729	22	68.7951	399.049	154.623	419.936	545.129	227.761
38	17	30	1.97917e+06	885417	2.23529	133.659	41.6912	12.2212	43.263	35.2837	20.2606
133	32	30	6.92708e+06	1.66667e+06	4.15625	251.594	77.3054	15.3754	78.5018	38.6985	26.1734
53	12	14	5.91518e+06	1.33929e+06	4.41667	202.173	82.1184	26.3535	85.4919	82.2229	42.0368
107	20	24	6.96615e+06	1.30208e+06	5.35	196.557	99.3386	24.3603	101.628	66.5928	40.2168
29	14	18	2.51736e+06	1.21528e+06	2.07143	183.454	38.644	12.6231	40.4871	38.4056	20.6833
80	9	24	5.20833e+06	585937	8.88889	88.4508	164.217	57.9202	171.806	194.53	88.9708
44	8	16	4296875	781250	5.5	117.934	102.102	39.3479	108.068	140.196	60.3219
44	16	12	5.72917e+06	2.08333e+06	2.75	314.492	51.2531	15.0318	53.1248	43.836	24.72
**********	**********	**********	**********	**********	**********	**********	**********	**********	**********	**********	**********
6813	1240	1039	1.02457e+07	1.86477e+06	5.49435	281.499	101.998	4.25773	102.035	6.35838	5.99661
Sample Number		7LQ-268			Mineral	Zircon			Sample Location:
Position (#)		53			Glass (U ppm)	49.4			N29.16355
Area of Graticule Square		6.4e-07			Irradiation	UA-Z7			E88.13490
No. of Crystals		26			Analyst	RJL
Zeta Factor ± Error		114.359	2.01935		Count Date	40655
Rho d (% Relative Error)		325867	2.18973		Locality
N d		2085.55			Rock Type
N s	N i	N g	ρ s	ρ i	ρ s / ρ i	U ppm	Grain Age (Ma)	± 1σ	50% Age	"+95%"	"-95%"
27	7	8	5.27344e+06	1.36719e+06	3.85714	207.26	71.4718	30.3806	76.8316	115.748	46.3705
16	8	8	3125000	1562500	2	236.868	37.1583	16.124	40.3676	59.4333	25.3372
97	16	12	1.26302e+07	2.08333e+06	6.0625	315.824	111.983	30.3804	115.114	87.1282	49.2864
63	15	15	6562500	1562500	4.2	236.868	77.7867	22.4548	80.3727	65.9539	36.4756
49	9	6	1.27604e+07	2.34375e+06	5.44444	355.302	100.655	36.6129	105.877	124.843	56.752
258	36	36	1.11979e+07	1562500	7.16667	236.868	132.171	23.8073	133.733	58.2918	40.4402
57	12	12	7.42187e+06	1.5625e+06	4.75	236.868	87.9039	28.0286	91.4341	87.3017	44.6492
30	8	8	5859375	1562500	3.75	236.868	69.4971	27.7227	74.0786	99.9426	42.8584
83	11	12	1.08073e+07	1.43229e+06	7.54545	217.129	139.082	44.7983	144.493	141.565	70.2713
50	11	8	9765625	2.14844e+06	4.54545	325.694	84.1431	28.122	87.8883	90.0483	44.5137
16	12	9	2.77778e+06	2.08333e+06	1.33333	315.824	24.796	9.49479	26.5613	30.7199	15.5432
49	6	10	7656250	937500	8.16667	142.121	150.4	65.1886	161.176	259.499	96.3811
36	7	24	2.34375e+06	455729	5.14286	69.0866	95.1207	39.3834	101.628	148.621	59.7066
114	17	8	22265625	3.32031e+06	6.70588	503.345	123.754	32.3627	126.927	91.2876	52.6516
76	6	6	1.97917e+07	1.5625e+06	12.6667	236.868	231.798	98.5116	247.133	384.184	144.397
61	11	10	9531250	1718750	5.54545	260.555	102.508	33.7022	106.812	107.378	53.1505
199	29	21	1.48065e+07	2.15774e+06	6.86207	327.104	126.608	25.4162	128.488	64.4686	42.7422
43	24	8	8.39844e+06	4687500	1.79167	710.605	33.2977	8.53576	34.2866	22.9727	14.5075
66	8	7	1.47321e+07	1.78571e+06	8.25	270.707	151.917	57.0331	159.967	200.577	86.7526
117	21	21	8.70536e+06	1562500	5.57143	236.868	102.984	24.578	105.218	66.4606	40.6801
70	17	9	1.21528e+07	2.95139e+06	4.11765	447.418	76.2704	20.7338	78.5173	59.0775	33.9962
276	13	30	14375000	677083	21.2308	102.643	383.926	109.495	394.601	317.046	170.996
54	30	21	4.01786e+06	2.23214e+06	1.8	338.383	33.4521	7.67529	34.2429	19.8197	13.1951
124	19	25	7750000	1187500	6.52632	180.02	120.471	29.8728	123.248	82.2377	49.0008
43	9	10	6718750	1406250	4.77778	213.181	88.4144	32.5046	93.1787	111.243	50.5153
141	20	24	9.17969e+06	1.30208e+06	7.05	197.39	130.041	31.2865	132.834	85.0555	51.4373
**********	**********	**********	**********	**********	**********	**********	**********	**********	**********	**********	**********
2215	382	368	9.40472e+06	1.62194e+06	5.79843	245.879	107.146	6.65733	107.271	12.3621	11.1112
Sample Number		9LQ-500			Mineral	Zircon			Sample Location:
Position (#)		54			Glass (U ppm)	49.4			N29.10226
Area of Graticule Square		6.4e-07			Irradiation	UA-Z7			E88.95357
No. of Crystals		105			Analyst	RJL
Zeta Factor ± Error		114.087	2.01935		Count Date	4.5.15
Rho d (% Relative Error)		324486	2.19438		Locality
N d		2076.71			Rock Type
N s	N i	N g	ρ s	ρ i	ρ s / ρ i	U ppm	Grain Age (Ma)	± 1σ	50% Age	"+95%"	"-95%"
52	19	8	10156250	3.71094e+06	2.73684	564.955	50.4603	13.6016	52.0108	38.0909	22.6275
23	5	2	17968750	3906250	4.6	594.69	84.5876	41.8066	93.1078	187.415	61.524
127	12	8	2.48047e+07	2343750	10.5833	356.814	192.978	58.5337	199.404	178.444	91.9878
34	5	4	13281250	1953125	6.8	297.345	124.654	59.8086	135.929	263.692	87.1436
33	10	4	12890625	3906250	3.3	594.69	60.7947	22.0122	64.1314	73.3408	34.7935
39	2	6	1.01562e+07	520833	19.5	79.292	351.198	254.815	423.212	2098.14	330.439
168	7	16	16406250	683594	24	104.071	429.597	166.163	451.872	582.426	244.325
24	4	3	1.25e+07	2.08333e+06	6	317.168	110.113	59.5487	123.148	302.846	85.1049
77	15	8	1.50391e+07	2.92969e+06	5.13333	446.017	94.3234	26.7534	97.2709	78.25	43.3112
67	3	10	10468750	468750	22.3333	71.3628	400.671	236.72	452.133	1331.62	318.028
87	12	9	1.51042e+07	2.08333e+06	7.25	317.168	132.818	41.0712	137.588	126.603	64.9498
37	3	6	9.63542e+06	781250	12.3333	118.938	224.338	134.819	255.575	808.809	183.693
39	9	12	5.07812e+06	1.17187e+06	4.33333	178.407	79.7142	29.5639	84.1435	101.466	46.0386
198	9	15	20625000	937500	22	142.726	394.871	135.041	410.815	434.91	203.961
109	19	8	2.12891e+07	3.71094e+06	5.73684	564.955	105.323	26.3519	107.832	72.7413	43.3105
75	8	10	11718750	1250000	9.375	190.301	171.235	63.8704	180.081	223.633	96.9294
80	10	6	2.08333e+07	2.60417e+06	8	396.46	146.403	49.2783	152.606	160.263	76.5756
66	6	6	1.71875e+07	1.5625e+06	11	237.876	200.458	85.6623	214.031	336.57	125.911
48	6	24	3.125e+06	390625	8	59.469	146.403	63.5286	156.939	253.158	93.9692
27	5	9	4687500	868056	5.4	132.153	99.1859	48.371	108.712	215.386	70.8798
48	12	8	9375000	2343750	4	356.814	73.6172	23.8503	76.7422	74.5969	38.1154
107	17	8	2.08984e+07	3.32031e+06	6.29412	505.486	115.463	30.3216	118.469	85.6554	49.3799
50	12	8	9765625	2343750	4.16667	356.814	76.6664	24.7394	79.8765	77.3025	39.5056
59	17	5	18437500	5312500	3.47059	808.778	63.9219	17.6877	65.9221	50.5741	29.0863
49	7	6	1.27604e+07	1.82292e+06	7	277.522	128.284	51.9604	136.382	194.069	78.2647
146	18	12	1.90104e+07	2.34375e+06	8.11111	356.814	148.413	37.3104	151.853	103.446	60.772
30	8	4	11718750	3125000	3.75	475.752	69.0407	27.5409	73.5922	99.2951	42.5777
65	5	10	10156250	781250	13	118.938	236.245	109.842	255.102	468.569	157.842
106	32	10	16562500	5000000	3.3125	761.203	61.0239	12.4283	62.048	31.3953	21.2265
46	21	9	7.98611e+06	3.64583e+06	2.19048	555.044	40.4183	10.7053	41.6597	29.4741	17.9915
57	16	10	8906250	2500000	3.5625	380.602	65.6061	18.6532	67.7688	54.0952	30.5303
160	13	18	1.38889e+07	1.12847e+06	12.3077	171.799	223.88	64.8741	230.579	192.444	102.378
20	10	10	3125000	1562500	2	237.876	36.9137	14.3344	39.4445	48.5138	22.927
37	10	9	6.42361e+06	1.73611e+06	3.7	264.307	68.125	24.3562	71.7086	80.8971	38.4036
41	12	4	16015625	4687500	3.41667	713.628	62.9336	20.7317	65.7602	65.0905	33.2337
58	8	12	7.55208e+06	1.04167e+06	7.25	158.584	132.818	50.232	140.058	177.461	76.5939
157	8	20	12265625	625000	19.625	95.1504	353.389	128.472	369.719	434.175	192.297
34	15	8	6640625	2.92969e+06	2.26667	446.017	41.8196	13.0161	43.599	38.7754	21.3903
55	9	10	8593750	1406250	6.11111	214.088	112.134	40.4443	117.775	137.466	62.5529
101	16	8	1.97266e+07	3125000	6.3125	475.752	115.797	31.3285	119.002	89.775	50.7927
82	18	10	12812500	2812500	4.55556	428.177	83.7756	21.9335	86.0296	61.5543	36.0459
81	28	12	1.05469e+07	3.64583e+06	2.89286	555.044	53.325	11.7865	54.4057	30.5259	20.0371
58	8	4	22656250	3125000	7.25	475.752	132.818	50.232	140.058	177.461	76.5939
86	15	8	16796875	2.92969e+06	5.73333	446.017	105.259	29.6017	108.448	86.3738	47.8358
101	18	16	9.86328e+06	1.75781e+06	5.61111	267.61	103.033	26.5199	105.641	74.1196	43.4404
120	18	21	8.92857e+06	1.33929e+06	6.66667	203.894	122.232	31.0873	125.193	86.5738	50.7874
113	15	9	1.96181e+07	2.60417e+06	7.53333	396.46	137.954	38.109	141.865	110.499	61.3161
62	18	15	6.45833e+06	1875000	3.44444	285.451	63.4427	17.08	65.3211	48.1963	28.2001
60	16	8	11718750	3125000	3.75	475.752	69.0407	19.5229	71.2749	56.5571	31.925
255	8	16	2.49023e+07	781250	31.875	118.938	564.542	203.326	589.277	662.357	300.896
65	22	8	1.26953e+07	4296875	2.95455	654.159	54.4573	13.5197	55.8539	36.6394	22.6668
97	20	12	1.26302e+07	2.60417e+06	4.85	396.46	89.1531	22.038	91.2675	60.3625	36.4379
4	2	18	347222	173611	2	26.4307	36.9137	31.9851	51.2792	345.501	45.9759
116	20	8	22656250	3906250	5.8	594.69	106.473	25.953	108.873	70.8426	42.7942
46	13	8	8984375	2.53906e+06	3.53846	386.548	65.1657	20.5512	67.8274	62.9798	33.128
125	23	14	1.39509e+07	2.56696e+06	5.43478	390.796	99.8198	22.8221	101.808	60.6347	38.0033
128	21	18	1.11111e+07	1.82292e+06	6.09524	277.522	111.846	26.521	114.215	71.5941	43.8372
53	11	8	1.03516e+07	2.14844e+06	4.81818	327.079	88.5722	29.4523	92.4447	94.1786	46.5687
60	23	15	6250000	2.39583e+06	2.6087	364.743	48.1064	11.8755	49.3497	31.9733	20.0044
155	17	12	2.01823e+07	2.21354e+06	9.11765	336.991	166.594	42.8215	170.591	119.919	69.3384
178	32	15	1.85417e+07	3.33333e+06	5.5625	507.469	102.147	19.8236	103.595	49.6597	33.6053
178	16	16	1.73828e+07	1562500	11.125	237.876	202.701	53.2115	207.691	150.293	85.5051
81	18	6	2.10937e+07	4.6875e+06	4.5	713.628	82.7605	21.6915	84.9957	60.8897	35.6552
53	5	6	1.38021e+07	1.30208e+06	10.6	198.23	193.277	90.5855	209.231	390.944	130.712
83	9	9	1.44097e+07	1562500	9.22222	237.876	168.48	59.3171	176.212	199.028	91.0624
30	7	6	7.8125e+06	1.82292e+06	4.28571	277.522	78.8435	33.1692	84.5493	125.94	50.4976
69	8	6	1.79687e+07	2.08333e+06	8.625	317.168	157.702	59.0673	165.984	207.442	89.7762
83	26	15	8.64583e+06	2.70833e+06	3.19231	412.318	58.8198	13.323	60.0547	34.9093	22.5245
52	14	8	10156250	2734375	3.71429	416.283	68.3866	20.6811	70.9311	62.0232	33.4955
180	28	12	2.34375e+07	3.64583e+06	6.42857	555.044	117.907	24.1823	119.749	61.7859	40.6284
53	13	12	6.90104e+06	1.69271e+06	4.07692	257.699	75.0247	23.3164	77.9401	71.221	37.4855
267	47	40	1.04297e+07	1.83594e+06	5.68085	279.504	104.303	16.759	105.301	39.6663	28.868
69	11	6	1.79687e+07	2.86458e+06	6.27273	436.106	115.074	37.5	119.751	119.111	59.0115
74	13	9	1.28472e+07	2.25694e+06	5.69231	343.599	104.512	31.5672	108.184	95.6893	50.453
171	42	25	10687500	2625000	4.07143	399.632	74.9242	13.0747	75.8119	31.5901	22.5311
96	28	20	7500000	2187500	3.42857	333.026	63.1518	13.6802	64.3488	35.3281	23.1953
55	5	8	1.07422e+07	976562	11	148.672	200.458	93.8044	216.899	404.025	135.253
40	9	8	7812500	1.75781e+06	4.44444	267.61	81.7452	30.2464	86.2506	103.735	47.0765
149	27	24	9.70052e+06	1.75781e+06	5.51852	267.61	101.346	21.3893	103.055	55.1491	35.9427
75	8	6	1.95312e+07	2.08333e+06	9.375	317.168	171.235	63.8704	180.081	223.633	96.9294
75	8	6	1.95312e+07	2.08333e+06	9.375	317.168	171.235	63.8704	180.081	223.633	96.9294
71	13	10	11093750	2031250	5.46154	309.239	100.307	30.3921	103.872	92.2159	48.6089
74	11	14	8.25893e+06	1.22768e+06	6.72727	186.903	123.333	40.0058	128.261	126.835	62.8784
91	6	10	14218750	937500	15.1667	142.726	274.791	116.081	292.497	448.27	169.566
91	14	10	14218750	2187500	6.5	333.026	119.205	34.3864	122.957	101.847	55.1614
71	16	9	1.23264e+07	2.77778e+06	4.4375	422.891	81.6183	22.7039	84.1143	65.5449	37.02
108	22	10	16875000	3437500	4.90909	523.327	90.2318	21.2588	92.1676	57.0841	35.3571
287	16	27	1.66088e+07	925926	17.9375	140.964	323.752	83.6628	331.188	232.216	133.294
171	24	20	13359375	1875000	7.125	285.451	130.551	28.6944	132.877	75.2288	47.7156
81	4	8	1.58203e+07	781250	20.25	118.938	364.331	186.892	399.037	875.067	259.671
55	7	12	7.16146e+06	911458	7.85714	138.761	143.818	57.8558	152.664	215.193	86.9462
80	10	8	15625000	1953125	8	297.345	146.403	49.2783	152.606	160.263	76.5756
244	15	21	1.81548e+07	1.11607e+06	16.2667	169.911	294.272	78.7199	301.582	222.773	125.039
168	24	16	16406250	2343750	7	356.814	128.284	28.2264	130.579	74.0281	46.9495
93	14	10	14531250	2187500	6.64286	333.026	121.8	35.0852	125.614	103.863	56.2624
163	17	20	12734375	1328125	9.58824	202.195	175.077	44.894	179.238	125.556	72.6368
41	14	10	6406250	2187500	2.92857	333.026	53.9806	16.7786	56.1809	50.5941	27.298
110	15	12	1.43229e+07	1.95312e+06	7.33333	297.345	134.329	37.1663	138.16	107.836	59.8248
139	22	20	10859375	1718750	6.31818	261.664	115.9	26.7936	118.221	71.6057	44.3955
57	12	9	9.89583e+06	2.08333e+06	4.75	317.168	87.3273	27.8452	90.8346	86.737	44.3575
68	11	12	8.85417e+06	1.43229e+06	6.18182	218.053	113.42	36.9983	118.048	117.562	58.237
160	21	20	12500000	1640625	7.61905	249.77	139.506	32.617	142.309	87.6467	53.7351
212	42	40	8281250	1640625	5.04762	249.77	92.7597	15.8837	93.7873	38.2514	27.29
133	15	12	1.73177e+07	1.95312e+06	8.86667	297.345	162.066	44.3777	166.506	128.141	71.219
92	24	15	9.58333e+06	2500000	3.83333	380.602	70.5665	16.2963	72.068	43.2087	27.3487
**********	**********	**********	**********	**********	**********	**********	**********	**********	**********	**********	**********
9009	1419	1122	1.2546e+07	1.9761e+06	6.34884	300.843	116.457	4.67362	116.493	6.69081	6.33474
Sample Number		12LQ-24			Mineral	Zircon			Sample Location:
Position (#)		54			Glass (U ppm)	49.4			N29.18525
Area of Graticule Square		6.4e-07			Irradiation	UA-Z7			E87.92965
No. of Crystals		31			Analyst	RJL
Zeta Factor ± Error		114.087	2.01935		Count Date	2015-06-16
Rho d (% Relative Error)		323106	2.19906		Locality
N d		2067.88			Rock Type
N s	N i	N g	ρ s	ρ i	ρ s / ρ i	U ppm	Grain Age (Ma)	± 1σ	50% Age	"+95%"	"-95%"
59	4	4	23046875	1562500	14.75	238.892	266.282	137.785	292.724	663.38	192.764
163	14	12	2.1224e+07	1.82292e+06	11.6429	278.708	211.096	59.0918	217.005	172.255	93.9076
98	10	8	19140625	1953125	9.8	298.615	178.14	59.3505	185.391	191.793	91.9087
151	14	12	1.96615e+07	1.82292e+06	10.7857	278.708	195.788	54.9771	201.34	160.651	87.479
151	8	15	1.57292e+07	833333	18.875	127.409	338.823	123.296	354.557	417.777	184.705
35	3	4	13671875	1171875	11.6667	179.169	211.52	127.387	241.244	768.205	173.812
144	13	16	14062500	1.26953e+06	11.0769	194.1	200.993	58.4832	207.112	174.126	92.4591
114	10	12	1.48437e+07	1.30208e+06	11.4	199.077	206.762	68.4407	214.958	219.986	105.711
34	7	12	4.42708e+06	911458	4.85714	139.354	88.9062	36.986	95.0927	139.864	56.1454
132	26	16	12890625	2.53906e+06	5.07692	388.2	92.9003	20.1047	94.5669	52.2658	33.7536
72	9	10	11250000	1406250	8	215.003	145.787	51.7076	152.673	174.335	79.5816
164	57	50	5125000	1781250	2.87719	272.337	52.8127	8.25608	53.3368	19.255	14.4458
31	4	6	8.07292e+06	1.04167e+06	7.75	159.262	141.281	75.1656	157.008	377.21	106.703
26	4	6	6.77083e+06	1.04167e+06	6.5	159.262	118.702	63.8413	132.47	323.388	91.0412
121	9	15	1.26042e+07	937500	13.4444	143.335	243.151	84.2905	253.618	278.75	128.547
57	12	9	9.89583e+06	2.08333e+06	4.75	318.523	86.9582	27.7278	90.4508	86.3756	44.1708
140	35	20	10937500	2734375	4	418.062	73.3057	14.0072	74.3557	34.7793	23.9576
77	14	16	7.51953e+06	1.36719e+06	5.5	209.031	100.582	29.361	103.889	87.3011	47.2294
77	21	9	1.33681e+07	3.64583e+06	3.66667	557.416	67.2287	16.659	68.8923	45.3994	27.7522
153	17	15	15937500	1.77083e+06	9	270.745	163.781	42.1259	167.721	118.02	68.227
260	28	25	16250000	1750000	9.28571	267.559	168.913	33.9331	171.349	86.0594	56.7068
65	14	16	6.34766e+06	1.36719e+06	4.64286	209.031	85.0097	25.162	87.9466	75.0961	40.5913
406	48	30	2.11458e+07	2500000	8.45833	382.228	154.041	23.9102	155.355	56.0455	40.9851
65	12	9	1.12847e+07	2.08333e+06	5.41667	318.523	99.0696	31.2525	102.899	97.0507	49.6691
78	15	9	1.35417e+07	2.60417e+06	5.2	398.154	95.1359	26.9562	98.0978	78.8251	43.6305
95	19	10	14843750	2968750	5	453.896	91.5027	23.1404	93.7682	64.0508	38.113
162	15	16	1.58203e+07	1.46484e+06	10.8	223.962	196.044	53.1985	201.224	152.767	85.1075
149	29	40	5.82031e+06	1.13281e+06	5.13793	173.197	94.0086	19.264	95.5137	49.1183	32.5296
376	74	40	14687500	2890625	5.08108	441.951	92.9758	12.1119	93.5576	27.1557	21.1482
129	32	18	1.11979e+07	2.77778e+06	4.03125	424.698	73.8752	14.7378	75.0304	37.1132	25.0982
148	16	15	1.54167e+07	1.66667e+06	9.25	254.819	168.272	44.5375	172.554	126.466	71.7802
**********	**********	**********	**********	**********	**********	**********	**********	**********	**********	**********	**********
3932	593	495	1.24116e+07	1.87184e+06	6.63069	286.188	121.066	6.33439	121.154	10.9386	10.0455
Sample Number		14LQ-50			Mineral	Zircon			Sample Location:
Position (#)		56			Glass (U ppm)	49.4			N29.13850
Area of Graticule Square		6.4e-07			Irradiation	UA-Z7			E88.15105
No. of Crystals		37			Analyst	RJL
Zeta Factor ± Error		114.087	2.01935		Count Date	4.10.2015
Rho d (% Relative Error)		321725	2.20378		Locality
N d		2059.04			Rock Type
N s	N i	N g	ρ s	ρ i	ρ s / ρ i	U ppm	Grain Age (Ma)	± 1σ	50% Age	"+95%"	"-95%"
30	4	6	7.8125e+06	1.04167e+06	7.5	159.945	136.193	72.5965	151.466	365.029	103.143
13	2	6	3.38542e+06	520833	6.5	79.9725	118.2	89.8411	147.703	858.357	120.752
101	16	12	1.3151e+07	2.08333e+06	6.3125	319.89	114.82	31.0651	117.998	89.0301	50.3667
10	9	9	1.73611e+06	1562500	1.11111	239.918	20.3592	9.37211	22.5457	33.9222	15.1033
16	6	6	4.16667e+06	1.5625e+06	2.66667	239.918	48.7546	23.3801	53.7206	97.2008	35.5563
18	7	6	4.6875e+06	1.82292e+06	2.57143	279.904	47.0197	20.9864	51.1609	81.1474	32.381
17	6	4	6640625	2343750	2.83333	359.876	51.7895	24.6362	56.9293	102.16	37.3973
37	9	12	4.81771e+06	1.17187e+06	4.11111	179.938	75.0102	27.9595	79.2513	96.1117	43.5894
15	8	10	2343750	1250000	1.875	191.934	34.319	15.0561	37.3832	55.6556	23.7024
89	22	18	7.72569e+06	1.90972e+06	4.04545	293.233	73.819	17.6996	75.5031	47.6946	29.5247
64	73	10	10000000	11406250	0.876712	1751.4	16.0696	2.78902	16.3112	6.46923	5.00153
21	6	9	3.64583e+06	1.04167e+06	3.5	159.945	63.9151	29.642	69.7482	121.884	44.7203
74	8	20	5781250	625000	9.25	95.967	167.562	62.5418	176.242	219.144	94.9404
43	9	12	5.59896e+06	1.17187e+06	4.77778	179.938	87.0921	32.0194	91.7857	109.606	49.7626
186	44	27	1.07639e+07	2.5463e+06	4.22727	390.977	77.117	13.1105	77.9781	31.4531	22.6205
58	11	18	5.03472e+06	954861	5.27273	146.616	96.0475	31.7029	100.138	101.158	50.0446
81	12	10	12656250	1875000	6.75	287.901	122.703	38.1126	127.184	117.719	60.3446
45	14	15	4687500	1.45833e+06	3.21429	223.923	58.7212	18.0466	61.0273	54.3023	29.308
41	13	12	5.33854e+06	1.69271e+06	3.15385	259.911	57.622	18.4131	60.0811	56.585	29.7482
26	11	6	6.77083e+06	2.86458e+06	2.36364	439.849	43.2328	15.598	45.7109	50.8331	25.0323
171	36	16	1.66992e+07	3515625	4.75	539.814	86.5892	16.0657	87.73	39.6123	27.4465
9	10	10	1406250	1562500	0.9	239.918	16.4959	7.59368	18.3262	26.7448	12.3905
12	4	8	2343750	781250	3	119.959	54.8231	31.69	62.9972	167.066	46.3323
25	11	10	3906250	1718750	2.27273	263.909	41.5754	15.0884	44.0026	49.2318	24.2364
92	24	18	7.98611e+06	2.08333e+06	3.83333	319.89	69.9693	16.159	71.4581	42.8463	27.1181
75	9	10	11718750	1406250	8.33333	215.926	151.15	53.4915	158.228	180.13	82.2691
34	43	20	2656250	3359375	0.790698	515.823	14.4948	3.35161	14.8941	8.35792	5.92561
46	65	16	4.49219e+06	6.34766e+06	0.707692	974.665	12.9747	2.52666	13.2304	5.98127	4.53222
40	13	6	1.04167e+07	3.38542e+06	3.07692	519.821	56.2227	18.0195	58.6457	55.4085	29.1266
44	6	12	5.72917e+06	781250	7.33333	119.959	133.198	58.089	142.97	232.349	86.0816
37	17	12	4.81771e+06	2.21354e+06	2.17647	339.883	39.82	11.7215	41.3407	33.8655	19.4419
55	11	16	5.37109e+06	1.07422e+06	5	164.943	91.1144	30.2041	95.0546	96.5038	47.7252
25	7	7	5.58036e+06	1562500	3.57143	239.918	65.2129	27.9471	70.2405	106.777	42.7396
26	5	8	5078125	976562	5.2	149.948	94.7324	46.3376	103.93	206.701	67.9685
47	14	12	6.11979e+06	1.82292e+06	3.35714	279.904	61.3187	18.7503	63.6868	56.3638	30.4257
59	9	14	6.58482e+06	1.00446e+06	6.55556	154.233	119.2	42.7894	125.092	145.161	66.0948
24	5	6	6.25e+06	1.30208e+06	4.8	199.931	87.4945	43.083	96.193	192.828	63.3297
**********	**********	**********	**********	**********	**********	**********	**********	**********	**********	**********	**********
1806	579	429	6.5778e+06	2.10883e+06	3.11917	323.805	56.9912	3.16277	57.0449	5.61916	5.15471

## Sheet: Liuqu Sandstone Petrography
Sample		Qm	Qp	Qpt	Qss	Silt	K	P	Phyllite	Schist	Lv.Lath	Lv.microlitic	Lv.felsic	Lv.vitric	Lv.mafic	Shale/mud	Chert	Black Chert	Musc	Chlorite	Biotite	Tourm	CaCO3	PRX	Serp	Chalcedony	Other	Total	Comments	Qt (qm+qp+qss+qpt)	Qt+c (Qt + chert)	F	L total	Qt+c normalized	F Normalized	Ltotal normalized		Qm	Lt	F	Qmnormalized	F normalized	Lt normalized	Ls	Lv	Lm	Lm (normalized)	Lv (normalized)	Ls (normalized)
1LQ51		24	62		9	73	1		45				61	75		8	51		20				9		8		4	450		95	146	1	303	32.4444	0.222222	67.3333		24	354	1	6.33245	0.263852	93.4037	141	136	53	16.0606	41.2121	42.7273
1LQ304		53	107		14	50			17				17	59		19	91		18						5			450		174	265	0	185	58.8889	0	41.1111		53	276	0	16.1094	0	83.8906	160	76	22	8.52713	29.4574	62.0155
1LQ344		233	125		1	19			3				6	11		18	19	1	9						3		2	450		359	378	0	71	84.1871	0	15.8129		233	91	0	71.9136	0	28.0864	57	17	6	7.5	21.25	71.25
1LQ471		55	116		5	61			23				17	72		18	64	1	11						5		2	450		176	240	0	209	53.4521	0	46.5479		55	274	0	16.7173	0	83.2827	144	89	28	10.728	34.0996	55.1724
1LQ660		47	145	3	22	37			13				32	33		11	92		13				2					450		217	309	0	141	68.6667	0	31.3333		47	233	0	16.7857	0	83.2143	142	65	16	7.17489	29.148	63.6771
1LQ1073		95	137	2	7	34	0	0	25	0			25	33		11	72		8				1					450		241	313	0	137	69.5556	0	30.4444		95	209	0	31.25	0	68.75	118	58	27	13.3005	28.5714	58.1281
4LQ45		26	42				4		10	2			35	76	7		235		2					6	4		1	450		68	303	4	141	67.6339	0.892857	31.4732		26	378	4	6.37255	0.980392	92.6471	235	118	16	4.33604	31.9783	63.6856
4LQ173		5	2			1		9	5	6	9		149	27			209		11						13	4		450		7	216	9	210	49.6552	2.06897	48.2759		5	434	9	1.11607	2.00893	96.875	214	185	24	5.67376	43.7352	50.591
5LQ589		66	43		1	10	4	1	66	18	5	2	76	9	3		133		9		1						3	450		110	243	5	179	56.9087	1.17096	41.9204		66	335	5	16.2562	1.23153	82.5123	143	95	84	26.087	29.5031	44.4099
6LQ130		176	51	1	4	19	1	6	27	2			56	57	1		28		4		3		10		3		1	450		232	260	7	181	58.0357	1.5625	40.4018		176	211	7	44.6701	1.77665	53.5533	57	114	33	16.1765	55.8824	27.9412
6LQ320		149	62		22	34	1	1	20		1	2	16	56			74		2		1		5		1		3	450		233	307	2	140	68.3742	0.445434	31.1804		149	215	2	40.7104	0.546448	58.7432	113	75	21	10.0478	35.8852	54.067
6LQ373		126	66		37	24	4	4	8				37	62	2		62		1	2	11	1		1			2	450		229	291	8	151	64.6667	1.77778	33.5556		126	213	8	36.3112	2.30548	61.3833	86	101	8	4.10256	51.7949	44.1026
7LQ268		171	69		4	14		5	15	1		1	41	54		11	58				2						4	450		244	302	5	142	67.2606	1.11359	31.6258		171	201	5	45.3581	1.32626	53.3156	83	96	16	8.20513	49.2308	42.5641
11LQ358		18	11				2	3	5		1	5	29	109	31	17	52		1	1	2			1	162			450		29	81	5	363	18.0401	1.11359	80.8463		18	416	5	4.10023	1.13895	94.7608	69	175	167	40.6326	42.5791	16.7883

## Sheet: Liuqu Clast Counts
Section		Red Chert	Green Chert	Black Chert	Quartzite	Green Lithic SS	Brown SS	White SS	Red Sandstone	Serpentinized Material	Limestone	Volcanic	Basalt	qtz vein	Granite	Siltstone	phyllite	Gabbro
1LQ10		25	38		2	25	2						8
1LQ65		13	35		5	27	1			9			12
1LQ123		22	35		4	36	1			2				1
1LQ200		26	18		3	36	1			15		1		5
1LQ275		9	24		2	50	2			7			2	7
1LQ365		16	17		1	37				3				4
1LQ687		0	17		3	53	4			3
1LQ1005		2	3			45				3				4
4LQ12		30	31			36	1		2	24
4LQ162		61	37		2	10				10
5LQ22		24	5		5	76	1			18
5LQ158		33	27		2	40		4		16
5LQ410		18	10	2	1	35	13	7		19
5LQ634		8	3	4	11	33	17	20		20	2
6LQ1		2	1	3	14	62	29			15
6LQ110		4		3	7	76	15	8		4		1
6LQ416		0	1	1	6	65	14	19		9		1						0
7LQ28		1	12	3	3	80		6		5	2
7LQ238		1	3	2	9	80	6	15
9LQ0		4	2	5	3		100
9LQ98		8	2				90
10LQ4		18				52				10		6						29
10LQ60		6				9				6	1	10	42					40
11LQ12		28	60	8		5						2	16				1
11LQ60		24	71			1							16
11LQ120		6	40			7						27	29					1
11LQ230		3	25			1				1		5	48					22
12LQ2		0	62	16		2						4	20					0

## Sheet: Liuqu carbon isotopes
Leary, R.J., DeCelles, P.G., Quade, J., Gehrels, G.E., and Waanders, G., 2016, The Liuqu Conglomerate, southern Tibet: Early Miocene basin development related to deformation within the Great Counter Thrust system: Lithosphere, doi:10.1130/L542.1.
δ13C VALUES FROM LIUQU SOIL CARBONATES
Sample	δ13C	Std Deviation	Lat	Lon	Type
1LQ473 A1	-10.1704	0.0295615	29.1211	88.5608	Paleosol Carbonate
1LQ473 A2	-10.2696	0.0469827	29.1211	88.5608	Paleosol Carbonate
1LQ473 B1	-11.3076	0.0516644	29.1211	88.5608	Paleosol Carbonate
1LQ473 C1	-10.1832	0.052627	29.1211	88.5608	Paleosol Carbonate
1LQ473 C2	-10.3005	0.0263752	29.1211	88.5608	Paleosol Carbonate
1LQ474 A1	-10.3927	0.0563165	29.1211	88.5608	Paleosol Carbonate
1LQ474 B1	-10.691	0.0277861	29.1211	88.5608	Paleosol Carbonate
1LQ474 B2	-10.6824	0.0147572	29.1211	88.5608	Paleosol Carbonate
1LQ475 A2	-9.87542	0.0252902	29.1211	88.5608	Paleosol Carbonate
1LQ475 A3	-10.876	0.0112804	29.1211	88.5608	Paleosol Carbonate
1LQ475 B1	-9.69197	0.0171947	29.1211	88.5608	Paleosol Carbonate
1LQ475 C1	-10.2311	0.0554005	29.1211	88.5608	Paleosol Carbonate
1LQ475 C2	-11.9243	0.027656	29.1211	88.5608	Paleosol Carbonate
1LQ705 A1	-8.46953	0.00487156	29.1191	88.5638	Paleosol Carbonate
1LQ705 B1	-9.36549	0.0119068	29.1191	88.5638	Paleosol Carbonate
1LQ705 B2	-8.11394	0.0195127	29.1191	88.5638	Paleosol Carbonate
1LQ730 B1	-9.23661	0.0236793	29.1191	88.5638	Paleosol Carbonate
1LQ730 B2	-9.11045	0.0548929	29.1191	88.5638	Paleosol Carbonate
1LQ730 C1	-9.14468	0.0425371	29.1191	88.5638	Paleosol Carbonate
1LQ730 C2	-9.67761	0.00582539	29.1191	88.5638	Paleosol Carbonate
1LQ821 A1	-8.7088	0.0233146	29.1186	88.5648	Paleosol Carbonate
1LQ821 A2	-9.14628	0.0351795	29.1186	88.5648	Paleosol Carbonate
1LQ821 B1	-9.29392	0.00941072	29.1186	88.5648	Paleosol Carbonate
1LQ821 B2	-9.88108	0.0440459	29.1186	88.5648	Paleosol Carbonate
1LQ821 C1	-9.37769	0.0112296	29.1186	88.5648	Paleosol Carbonate
1LQ821 C2	-9.39207	0.0460838	29.1186	88.5648	Paleosol Carbonate
4LQ47 A1	-10.5877	0.0361274	29.2006	87.6583	Paleosol Carbonate
4LQ47 A2	-10.7872	0.0326421	29.2006	87.6583	Paleosol Carbonate
4LQ47 B1	-10.2382	0.0179944	29.2006	87.6583	Paleosol Carbonate
4LQ47 B2	-8.48328	0.0231453	29.2006	87.6583	Paleosol Carbonate
6LQ130 A1	-9.90427	0.0266101	29.1648	88.1488	Paleosol Carbonate
6LQ130-A2	-9.0187	0.0140781	29.1648	88.1488	Paleosol Carbonate
6LQ130 B1	-9.47124	0.0178673	29.1648	88.1488	Paleosol Carbonate
6LQ130 B2	-9.20171	0.0292273	29.1648	88.1488	Paleosol Carbonate
7LQ165 A1	-9.39186	0.0121	29.1634	88.1369	Paleosol Carbonate
10LQ-84 A1	-7.28078	0.0180794	29.1931	87.9167	Paleosol Carbonate
10LQ-84 A2	-7.56165	0.0482804	29.1931	87.9167	Paleosol Carbonate
10LQ-84 B1	-7.23592	0.0358124	29.1931	87.9167	Paleosol Carbonate
10LQ-84 B2	-7.60112	0.009264	29.1931	87.9167	Paleosol Carbonate
10LQ-84 C1	-7.91968	0.0146009	29.1931	87.9167	Paleosol Carbonate
10LQ-84 C2	-8.60511	0.0309827	29.1931	87.9167	Paleosol Carbonate
10LQ-84 D1	-7.50487	0.0357849	29.1931	87.9167	Paleosol Carbonate
10LQ-84 D2	-7.84688	0.0108838	29.1931	87.9167	Paleosol Carbonate
4LQ115 A1	-10.6344	0.00816929	29.1995	87.6576	Reworked Paleosol Carbonate
4LQ115 A2	-11.6152	0.047049	29.1995	87.6576	Reworked Paleosol Carbonate
5LQ636 A1	0.850819	0.0287736	29.1692	88.1551	Limestone Clast
5LQ636 A2	1.40268	0.00868924	29.1692	88.1551	Limestone Clast
5LQ636 B1	1.00755	0.0350772	29.1692	88.1551	Limestone Clast
5LQ636 B2	0.151373	0.020521	29.1692	88.1551	Limestone Clast
5LQ636 C1	-0.28689	0.0273194	29.1692	88.1551	Limestone Clast
5LQ636 C2	-0.342593	0.0363985	29.1692	88.1551	Limestone Clast
5LQ636 D1	-6.80143	0.0319559	29.1692	88.1551	Reworked Paleosol Carbonate
5LQ636 D2	-8.17516	0.0288837	29.1692	88.1551	Reworked Paleosol Carbonate
6LQ63 A1	0.658197	0.0343108	29.1622	88.1504	Limestone Clast
6LQ63 A2	0.24481	0.0399963	29.1622	88.1504	Limestone Clast
6LQ63 B1	0.749072	0.0233984	29.1622	88.1504	Limestone Clast
6LQ63 B2	0.777137	0.0462203	29.1622	88.1504	Limestone Clast
6LQ63 C1	-0.0707778	0.0341349	29.1622	88.1504	Limestone Clast
6LQ63 C2	-0.856688	0.0330689	29.1622	88.1504	Limestone Clast
7LQ150 A1	1.22603	0.0319038	29.1634	88.1369	Limestone Clast
5LQ150 A2	1.81456	0.0260317	29.1634	88.1369	Limestone Clast
7LQ150 A3	-0.660524	0.0216914	29.1634	88.1369	Limestone Clast
